# Supplementary material
Source: PubMed Central journal article supplement (PMC3091075)

## Suzuki–Miyaura Coupling of Aryl Carbamates and Sulfamates: Experimental and Computational Studies

Kyle W. Quasdorf, Aurora Antoft-Finch, Peng Liu, Amanda L. Silberstein, Anna Komaromi, Tom Blackburn, Stephen D. Ramgren, K. N. Houk,\* Victor Snieckus,\* and Neil K. Garg\*

*Department of Chemistry and Biochemistry, University of California, Los Angeles, California 90095*

*and*

*Department of Chemistry, Queen's University, Kingston, Ontario K7L 3N6, Canada*

### Supporting Information – Table of Contents

|                                                             |            |
|-------------------------------------------------------------|------------|
| <b>Materials and Methods</b> .....                          | <b>S1</b>  |
| <b>Experimental Procedures</b> .....                        | <b>S2</b>  |
| <b>A. Synthesis of Aryl Sulfamate Substrates</b> .....      | <b>S2</b>  |
| <b>B. Cross-Coupling Reactions of Aryl Sulfamates</b> ..... | <b>S6</b>  |
| <b>C. Mechanistic and Competition Experiments</b> .....     | <b>S14</b> |
| <b><sup>1</sup>H NMR Spectra</b> .....                      | <b>S18</b> |

**Materials and Methods.** Unless stated otherwise, reactions were conducted in flame-dried glassware under an atmosphere of nitrogen using anhydrous solvents (either freshly distilled or passed through activated alumina columns). All commercially obtained reagents were used as received. NiCl<sub>2</sub> (anhydrous) and PCy<sub>3</sub> were obtained from Strem Chemicals. Finely powdered anhydrous K<sub>3</sub>PO<sub>4</sub> was obtained from Acros.<sup>1</sup> Boronic acids were obtained from Oakwood Products, Inc., Frontier Scientific, Inc. and TCI. Reaction temperatures were controlled using an IKAmag temperature modulator, and unless stated otherwise, reactions were performed at room temperature (rt, approximately 23 °C). Thin-layer chromatography (TLC) was conducted with EMD gel 60 F254 pre-coated plates (0.25 mm) and visualized using a combination of UV, anisaldehyde, ceric ammonium molybdate, iodine, and potassium permanganate staining. EMD silica gel 60 (particle size 0.040–0.063 mm) was used for flash column chromatography. <sup>1</sup>H NMR spectra were recorded on Bruker spectrometers (at 500 MHz) and are reported relative to deuterated solvent signals. Data for <sup>1</sup>H NMR spectra are reported as follows: chemical shift (δ ppm), multiplicity, coupling constant (Hz) and integration. <sup>13</sup>C NMR spectra were recorded on Bruker Spectrometers (at 125 MHz). Data for <sup>13</sup>C NMR spectra are reported in terms of chemical shift. IR spectra were recorded on a Perkin-Elmer 100 spectrometer and are reported in terms of frequency of absorption (cm<sup>-1</sup>). Melting points are uncorrected and were obtained on a

---

<sup>1</sup> Powdered potassium phosphate was found to be essential for reproducibility and high yields. Granular or pellet material from Sigma-Aldrich, Strem Chemicals, or Pfaltz & Bauer gave poor results, even after grinding with mortar and pestle.

Laboratory Devices Mel-Temp II instrument. High resolution mass spectra were obtained from the UC Irvine Mass Spectrometry Facility.

## Experimental Procedures.

*Note:* Supporting information for aryl carbamates (synthesis and cross-couplings) and synthetic applications have previously been reported.<sup>2,3</sup>

### A. Synthesis of Aryl Sulfamate Substrates

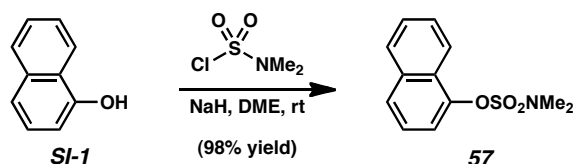

**Representative Procedure (sulfamate **57** is used as an example).** A round bottom flask was charged with NaH (0.60 g, 15.12 mmol, 1.2 equiv, 60% dispersion in oil). Then a solution of 1-naphthol (**SI-1**) (1.82 g, 12.60 mmol, 1 equiv) in DME (32 mL) was added dropwise via cannula to the NaH. A solution of dimethylsulfamoyl chloride (1.30 mL, 11.97 mmol, 0.95 equiv) in DME (10 mL) was then added dropwise via cannula to the reaction vessel. The reaction was allowed to stir for 17 h, and then quenched with H<sub>2</sub>O (2 mL). The volatiles were removed under reduced pressure, and then Et<sub>2</sub>O (20 mL) and H<sub>2</sub>O (15 mL) were added. The layers were separated, and the organic layer was washed successively with a solution of 1 M KOH (10 mL) and H<sub>2</sub>O (20 mL). The combined aqueous layers were extracted with Et<sub>2</sub>O (3 x 15 mL). The combined organic layers were then washed with brine (15 mL), dried over MgSO<sub>4</sub>, and concentrated under reduced pressure. The crude residue was purified by flash chromatography (4:1 Hexanes:EtOAc) to yield 1-naphthylsulfamate **57** as a white solid (2.97 g, 98% yield). *R<sub>f</sub>* 0.29 (4:1 Hexanes:EtOAc); <sup>1</sup>H NMR (500 MHz, CDCl<sub>3</sub>): δ 8.18 (d, *J* = 8.5, 1H), 7.88 (d, *J* = 7.5, 1H), 7.77 (d, *J* = 8.0, 1H), 7.60-7.53 (m, 3H), 7.46 (t, *J* = 8.0, 1H), 3.07 (s, 6H); <sup>13</sup>C NMR (125 MHz, CDCl<sub>3</sub>): δ 146.0, 134.7, 127.8, 127.0, 126.7, 126.7, 126.6, 125.3, 121.4, 117.7, 38.8; IR (film): 3065, 2944, 195, 1456, 1357 cm<sup>-1</sup>; HRMS-ESI (*m/z*) [M + Na]<sup>+</sup> calcd for C<sub>12</sub>H<sub>13</sub>NO<sub>3</sub>SNa, 274.0514; found, 274.0511.

<sup>2</sup> Quasdorf, K. W.; Riener, M.; Petrova, K.; Garg, N. K. *J. Am. Chem. Soc.* **2009**, *131*, 17748–17749.

<sup>3</sup> Antoft-Finch, A.; Blackburn, T.; Snieckus, V. *J. Am. Chem. Soc.* **2009**, *131*, 17750–17752.

*Note:* Supporting information for the synthesis of the aryl sulfamates shown in Tables 6 and 7 have previously been reported.<sup>2</sup>

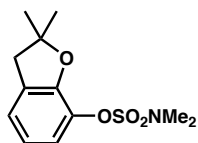

**SI-2**

**SI-2 (Table 9, entry 1).** Purification by flash chromatography (5:1 Benzene:Et<sub>2</sub>O) afforded **SI-2** as a light yellow oil (66% yield). *R<sub>f</sub>* 0.70 (5:1 Benzene:Et<sub>2</sub>O); <sup>1</sup>H NMR (500 MHz, CDCl<sub>3</sub>): δ 7.16 (dd, *J* = 8.2, 0.7, 1H), 7.03 (dd, *J* = 7.4, 1.1, 1H), 6.79 (dd, *J* = 8.0, 7.5 1H), 3.06 (s, 2H), 2.97 (s, 6H), 1.51 (s, 6H); <sup>13</sup>C NMR (125 MHz, CDCl<sub>3</sub>): δ 150.4, 134.3, 130.1, 123.5, 122.7, 120.4, 88.6, 43.2, 38.8, 28.4; IR (film): 2927, 1617, 1478, 1372, 1172, 1009 cm<sup>-1</sup>; HRMS-ESI (*m/z*) [M + Na]<sup>+</sup> calcd for C<sub>12</sub>H<sub>17</sub>NO<sub>4</sub>SNa, 294.0776; found, 294.0779.

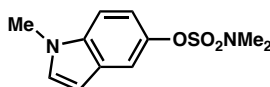

**SI-3**

**SI-3 (Table 9, entry 2).** Supporting information for the synthesis of sulfamate **SI-3** has previously been reported.<sup>2</sup>

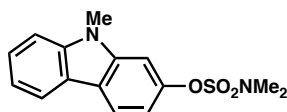

**SI-4**

**SI-4 (Table 9, entry 3).** Purification by flash chromatography (2:1 Hexanes:EtOAc) afforded **SI-4** as a white solid (78% yield). *R<sub>f</sub>* 0.70 (1:1 Hexanes:EtOAc); <sup>1</sup>H NMR (500 MHz, CDCl<sub>3</sub>): δ 8.07-8.04 (m, 2H), 7.49 (t, *J* = 7.5, 1H), 7.39 (d, *J* = 8.0, 1H), 7.37 (s, 1H), 7.26 (t, *J* = 7.5, 1H), 7.13 (d, *J* = 8.0, 1H), 3.82 (s, 3H), 3.02 (s, 6H); <sup>13</sup>C NMR (125 MHz, CDCl<sub>3</sub>): δ 148.5, 141.6, 141.2, 125.8, 122.1, 121.3,

210.8, 120.2, 119.4, 112.6, 108.6, 102.1, 38.7, 29.2; IR (film): 2935, 1599, 1452, 1359, 1179  $\text{cm}^{-1}$ ; HRMS-ESI ( $m/z$ )  $[\text{M} + \text{Na}]^+$  calcd for  $\text{C}_{15}\text{H}_{16}\text{N}_2\text{O}_3\text{SNa}$ , 327.0779; found, 327.0774.

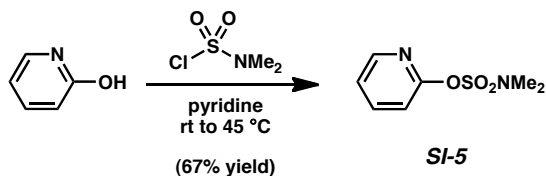

**SI-5 (Table 9, entry 4).** To a solution of 2-hydroxypyridine (2.00 g, 21.05 mmol, 1 equiv) in pyridine (21.1 mL) was added dimethylsulfamoyl chloride (2.7 mL, 25.26 mmol, 1.2 equiv) dropwise via syringe. The resulting orange solution was heated to 45 °C and allowed to stir for 22 h. After cooling to 23 °C, the solution was diluted with  $\text{Et}_2\text{O}$  (60 mL) and 1 M KOH (15 mL), and the layers were separated. The aqueous layer was extracted with  $\text{Et}_2\text{O}$  (2 x 60 mL), followed by EtOAc (1 x 60 mL). The combined organic layers were then washed with brine (10 mL), dried over  $\text{MgSO}_4$ , and concentrated under reduced pressure. The crude residue was purified by flash chromatography (3:2 Hexanes:EtOAc) to yield **SI-5** as a yellow oil (67% yield).  $R_f$  0.29 (2:1 Hexanes: EtOAc);  $^1\text{H}$ NMR (500 MHz,  $\text{CDCl}_3$ ):  $\delta$  8.26-8.24 (m, 1H), 7.72-7.69 (m, 1H), 7.16 (m, 1H), 7.06 (d,  $J = 2.0$ , 1H), 2.92 (s, 6H);  $^{13}\text{C}$ NMR (125 MHz,  $\text{CDCl}_3$ ):  $\delta$  157.1, 147.9, 140.0, 122.1, 115.0, 38.3; IR (film): 2941, 1591, 1430, 1375, 1162  $\text{cm}^{-1}$ ; HRMS-ESI ( $m/z$ )  $[\text{M} + \text{Na}]^+$  calcd for  $\text{C}_7\text{H}_{10}\text{N}_2\text{O}_3\text{SNa}$ , 225.0310; found, 225.0305.

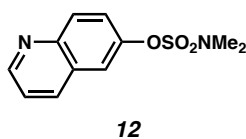

**12 (Table 9, entry 5).** Purification by flash chromatography (100%  $\text{Et}_2\text{O}$ ) afforded **12** as a white solid (84% yield).  $R_f$  0.50 (4:1 Hexanes:EtOAc);  $^1\text{H}$ NMR (500 MHz,  $\text{CDCl}_3$ ):  $\delta$  8.91 (dd,  $J = 4.5, 2.0$ , 1H), 8.16-8.10 (m, 2H), 7.75 (d,  $J = 2.5$ , 1H), 7.60 (dd,  $J = 9.0, 2.5$ , 1H), 7.42-7.38 (m, 1H), 3.02 (s, 6H);  $^{13}\text{C}$ NMR (125 MHz,  $\text{CDCl}_3$ ):  $\delta$  150.7, 147.9, 146.5, 135.9, 131.6, 128.4, 124.2, 121.8, 118.7, 38.7; IR (film): 2979, 1498, 1174, 1113, 791  $\text{cm}^{-1}$ ; HRMS-ESI ( $m/z$ )  $[\text{M} + \text{Na}]^+$  calcd for  $\text{C}_{11}\text{H}_{12}\text{N}_2\text{O}_3\text{SNa}$ , 275.0446; found, 275.0470.

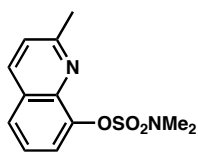

**SI-6**

**SI-6 (Table 9, entry 6).** Purification by flash chromatography (2:1 Hexanes:EtOAc) afforded **SI-6** as a white solid (78% yield).  $R_f$  0.44 (2:1 Hexanes:EtOAc);  $^1\text{H}$ NMR (500 MHz,  $\text{CDCl}_3$ ):  $\delta$  8.05 (d,  $J = 8.5$ , 1H), 7.74 (d,  $J = 8.0$ , 1H), 7.69 (d,  $J = 8.0$ , 1H), 7.46 (t,  $J = 8.0$ , 1H), 7.33 (d,  $J = 8.5$ , 1H), 3.04 (s, 6H), 2.76 (s, 3H);  $^{13}\text{C}$ NMR (125 MHz,  $\text{CDCl}_3$ ):  $\delta$  159.6, 145.7, 136.0, 127.8, 126.1, 125.3, 122.7, 122.6, 38.9, 25.4; IR (film): 2922, 1426 1369, 1167, 1069  $\text{cm}^{-1}$ ; HRMS-ESI ( $m/z$ )  $[\text{M} + \text{Na}]^+$  calcd for  $\text{C}_{12}\text{H}_{14}\text{N}_2\text{O}_3\text{SNa}$ , 289.0623; found, 289.0624.

## B. Cross-Coupling Reactions of Aryl Sulfamates

*Note:* Supporting information for the cross-coupling of the aryl sulfamates shown in Tables 6 and 7 have previously been reported.<sup>2</sup>

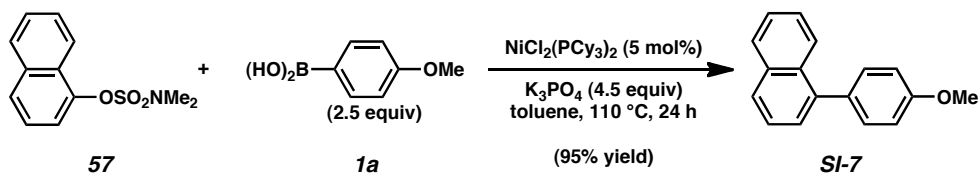

**Representative Procedure (coupling of naphthyl sulfamate **57**, Table 6, entry 1) is used as an example). **SI-7**.** A 1-dram vial was charged with anhydrous powdered  $\text{K}_3\text{PO}_4$  (382 mg, 1.80 mmol, 4.5 equiv, *obtained from Acros*) and a magnetic stir bar. The vial and contents were flame-dried under reduced pressure, then allowed to cool under  $\text{N}_2$ . Boronic acid **1a** (152 mg, 1.00 mmol, 2.5 equiv),  $\text{NiCl}_2(\text{PCy}_3)_2$  (13.7 mg, 0.02 mmol, 5 mol%), and sulfamate substrate **57** (100 mg, 0.40 mmol, 1 equiv) were added. The vial was then evacuated and backfilled with  $\text{N}_2$ . Toluene (1.5 mL) was added and the vial was sealed with a Teflon-lined screw cap. The heterogeneous mixture was allowed to stir at 23 °C for 1 h, then heated to 110 °C for 24 h. The reaction vessel was cooled to 23 °C and then transferred to a round bottom flask containing  $\text{CH}_2\text{Cl}_2$  (20 mL). Silica gel (3 mL) was added and the solvent was removed under reduced pressure to afford a free-flowing powder. This powder was then dry-loaded onto a silica gel column (4.5 x 5 cm) and purified by flash chromatography (2:1 Hexanes: Benzene) to yield biaryl product **SI-7** (89 mg, 95% yield) as a colorless solid.  $R_f$  0.35 (2:1 Hexanes: Benzene);  $^1\text{H}$  NMR (500 MHz,  $\text{CDCl}_3$ ):  $\delta$  7.95 (d,  $J = 8.5$ , 1H), 7.92 (d,  $J = 8.5$ , 1H), 7.86 (d,  $J = 8.5$ , 1H), 7.57-7.48 (m, 2H), 7.48-7.39 (m, 4H), 7.06 (d,  $J = 8.5$ , 2H), 3.92 (s, 3H). All spectral data are consistent with those previously reported.<sup>4</sup>

*Any modifications of the conditions shown in this representative procedure are specified in the following schemes, which depict all of the results shown in Table 8–10 and Scheme 3.*

<sup>4</sup> Denmark, S. E.; Ober, M. H. *Org. Lett.* **2003**, *5*, 1357–1360.

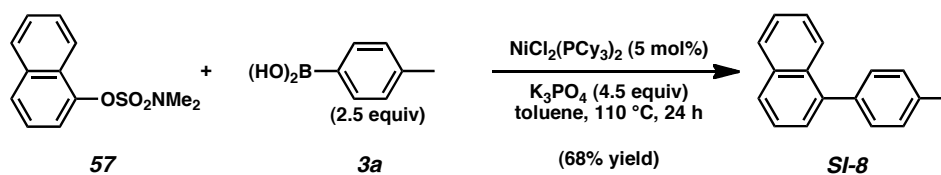

**SI-8 (Table 8, entry 1).** Purification by flash chromatography (100% Hexanes) afforded a mixture (30.8 to 1) of biaryl product **SI-8** (68% yield) and 4,4'-dimethylbiphenyl.  $R_f$  0.74 (9:1 Hexanes:EtOAc). All spectral data are consistent with those previously reported.<sup>5</sup>

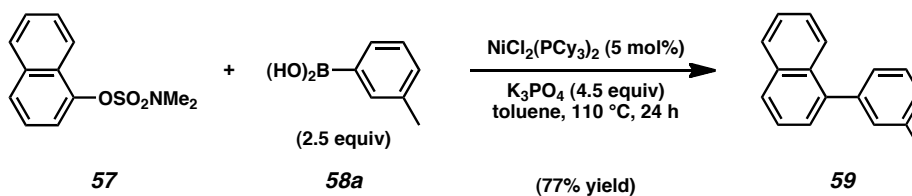

**59 (Table 8, entry 2).** Purification by flash chromatography (100% Hexanes) afforded a mixture (15.8 to 1) of biaryl product **59** (77% yield) and 3,3'-dimethylbiphenyl.  $R_f$  0.66 (9:1 Hexanes:EtOAc). All spectral data are consistent with those previously reported.<sup>6</sup>

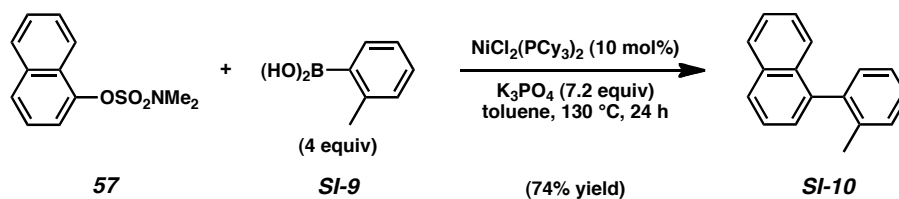

**SI-10 (Table 8, entry 3).** Purification by flash chromatography (100% Hexanes) afforded a mixture (51.8 to 1) of biaryl product **SI-10** (74% yield) and 2,2'-dimethylbiphenyl.  $R_f$  0.66 (9:1 Hexanes:EtOAc). All spectral data are consistent with those previously reported.<sup>7</sup>

<sup>5</sup> Mino, T.; Shirae, Y.; Sakamoto, M.; Fujita, T. *J. Org. Chem.* **2005**, *70*, 2191–2194.

<sup>6</sup> Zhang, L.; Cheng, J.; Zhang, W.; Lin, B.; Pan, C.; Chen, J. *Synth. Commun.* **2007**, *37*, 3809–3814.

<sup>7</sup> Dalpozzo R.; Nino, A.; Maiuolo, L.; Oliverio, M.; Porcopio, A.; Russo, B.; Tocci, A. *Australian J. Chem.* **2007**, *60*, 75–79.

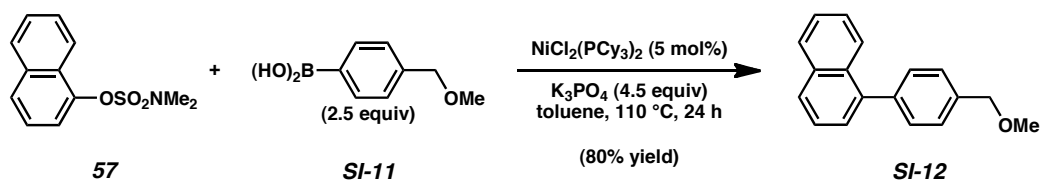

**SI-12 (Table 8, entry 4).** Purification by flash chromatography (9:1 Hexanes:EtOAc) afforded **SI-12** as a clear oil (80% yield).  $R_f$  0.58 (9:1 Hexanes:EtOAc);  $^1\text{H}$ NMR (500 MHz,  $\text{C}_6\text{D}_6$ ):  $\delta$  8.02 (d,  $J = 8.4$ , 1H), 7.70 (d,  $J = 8.1$ , 1H), 7.65 (d,  $J = 7.9$ , 1H), 7.38 (d,  $J = 7.9$ , 2H), 7.35-7.25 (m, 5H), 7.22 (m, 1H), 4.31 (s, 2H), 3.18 (s, 3H);  $^{13}\text{C}$ NMR (125 MHz,  $\text{C}_6\text{D}_6$ ):  $\delta$  140.0, 139.8, 137.5, 133.8, 131.7, 129.7, 127.6, 127.4, 127.4, 127.2, 127.2, 126.7, 125.9, 125.7, 125.4, 125.1, 73.8, 57.3; IR (film): 2923, 1592, 1504, 1395, 1096  $\text{cm}^{-1}$ ; HRMS-ESI ( $m/z$ )  $[\text{M} + \text{NH}_4]^+$  calcd for  $\text{C}_{18}\text{H}_{16}\text{ONH}_4$ , 266.1545; found, 266.1550.

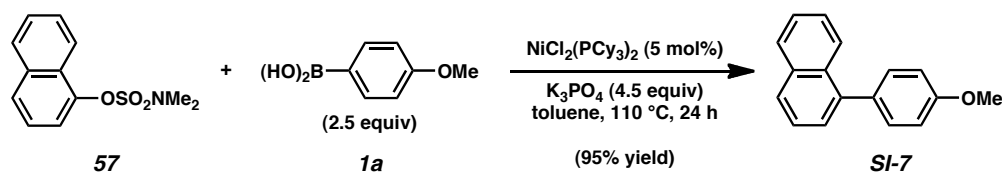

**SI-7 (Table 8, entry 5).** Purification by flash chromatography (2:1 Hexanes:Benzene) afforded **SI-7** as a white solid (95% yield).  $R_f$  0.35 (2:1 Hexanes:Benzene). Spectral data match those reported above.

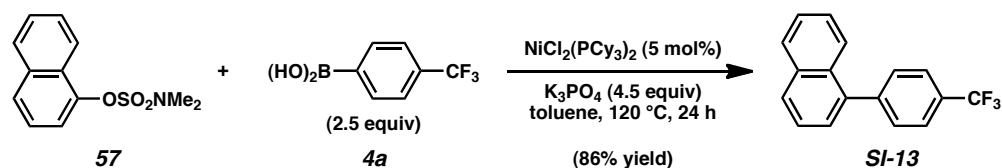

**SI-13 (Table 8, entry 6).** Purification by flash chromatography (2:1 Hexanes:Benzene) afforded a mixture (25.0 to 1) of biaryl product **SI-13** (86% yield) and 4,4'-bis(trifluoromethyl)biphenyl.  $R_f$  0.76 (2:1 Hexanes:Benzene). All spectral data are consistent with those previously reported.<sup>8</sup>

<sup>8</sup> Song, C.; Ma, Y.; Chai, Q.; Ma, C.; Jiang, W.; Andrus, M. B. *Tetrahedron* **2005**, *61*, 7438–7446.



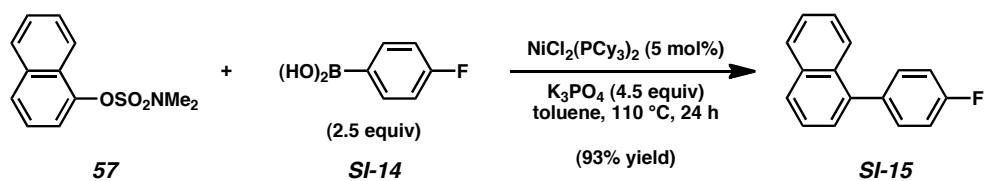

**SI-15 (Table 8, entry 7).** Purification by flash chromatography (20:1 Hexanes:EtOAc) afforded **SI-15** as a white solid (93% yield).  $R_f$  0.61 (9:1 Hexanes:EtOAc);  $^1\text{H}$ NMR (500 MHz,  $\text{CDCl}_3$ ):  $\delta$  7.91 (d,  $J = 7.6$ , 1H), 7.87 (d,  $J = 8.4$ , 1H), 7.85 (d,  $J = 8.4$ , 1H), 7.55–7.48 (m, 2H), 7.48–7.42 (m, 3H), 7.40 (d,  $J = 7.0$ , 1H) 7.19 (t,  $J = 8.6$ , 2H);  $^{13}\text{C}$ NMR (125 MHz,  $\text{CDCl}_3$ )  $\delta$  139.3, 136.8 (d), 134.0, 131.8, 131.8, 131.7, 128.5, 128.0, 127.2, 126.3, 126.0, 125.9, 125.5, 115.4, 115.3; IR (film): 3043, 1604, 1503, 1395, 1219, 1157  $\text{cm}^{-1}$ ; HRMS-ESI ( $m/z$ )  $[\text{M} + \text{NH}_4]^+$  calcd for  $\text{C}_{16}\text{H}_{11}\text{FNH}_4$ , 240.1189; found, 240.1198. All spectral data are consistent with those previously reported.<sup>9</sup>

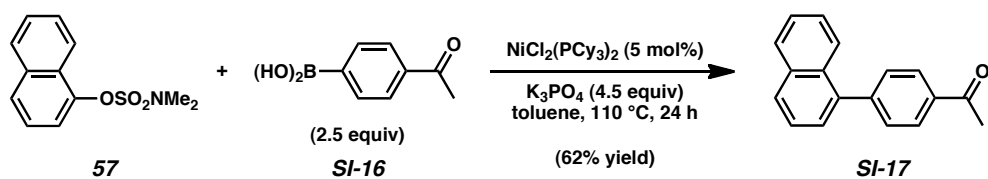

**SI-17 (Table 8, entry 8).** Purification by flash chromatography (9:1 Hexanes:EtOAc) afforded **SI-17** as a white solid (62% yield).  $R_f$  0.52 (4:1 Hexanes:EtOAc);  $^1\text{H}$ NMR (500 MHz,  $\text{CDCl}_3$ ):  $\delta$  8.10 (d,  $J = 8.3$ , 2H), 7.92 (dd,  $J = 13.0$ , 8.2, 2H), 7.86 (d,  $J = 8.4$ , 1H), 7.61 (d,  $J = 8.3$ , 2H), 7.57–7.50 (m, 2H), 7.49–7.41 (m, 2H), 2.69 (s, 3H);  $^{13}\text{C}$ NMR (125 MHz,  $\text{CDCl}_3$ )  $\delta$  197.7, 145.7, 138.9, 135.9, 133.7, 131.1, 130.2, 128.3, 128.3, 128.3, 126.8, 126.3, 125.9, 125.5, 125.2, 26.6; IR (film): 3054, 1682, 1605, 1503, 1403, 1268  $\text{cm}^{-1}$ ; HRMS-ESI ( $m/z$ )  $[\text{M} + \text{NH}_4]^+$  calcd for  $\text{C}_{18}\text{H}_{14}\text{ONH}_4$ , 264.1388; found, 264.1394. All spectral data are consistent with those previously reported.<sup>10</sup>

<sup>9</sup> Okamoto, H.; Satake, K.; Kimura, M. *Bull. Chem. Soc. Jpn.* **1995**, *68*, 3557–3562.

<sup>10</sup> Adjabeng, G.; Brenstrum, T.; Frampton, C. S.; Robertson, A. J.; Hillhouse, J.; McNulty, J.; Capretta, A. *J. Org. Chem.* **2004**, *69*, 5082–5086.

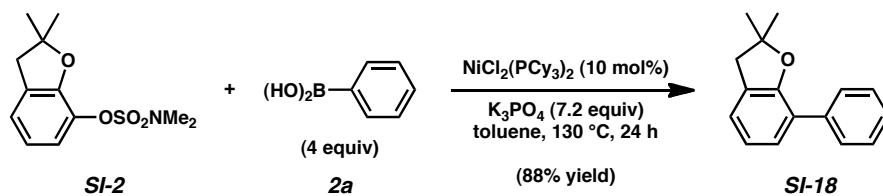

**SI-18 (Table 9, entry 1).** Purification by flash chromatography (1:1 Benzene:Hexanes) afforded **SI-18** as a light yellow oil (88% yield).  $R_f$  0.52 (1:1 Benzene:Hexanes);  $^1\text{H}$  NMR (500 MHz,  $\text{CDCl}_3$ ):  $\delta$  7.77 (d,  $J = 7.7$ , 2H), 7.45 (t,  $J = 7.7$ , 2H), 7.34–7.31 (m, 2H), 7.14 (dd  $J = 7.2$ , 0.9, 1H), 6.93 (t,  $J = 7.5$ , 1H), 3.09 (s, 2H), 1.54 (s, 6H);  $^{13}\text{C}$  NMR (125 MHz,  $\text{CDCl}_3$ ):  $\delta$  156.3, 137.7, 128.4, 128.4, 128.2, 127.9, 127.0, 124.3, 123.4, 120.0, 86.5, 43.0, 28.4; IR (film): 2972, 1597, 1459, 1425, 1139  $\text{cm}^{-1}$ ; HRMS-ESI ( $m/z$ )  $[\text{M} + \text{H}]^+$  calcd for  $\text{C}_{16}\text{H}_{17}\text{O}$ , 225.1279; found, 225.1274.

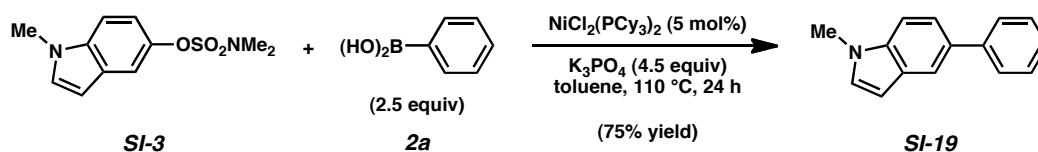

**SI-19 (Table 9, entry 2).** Purification by flash chromatography (2:1 Hexanes:Benzene) afforded **SI-19** as a white solid (75% yield).  $R_f$  0.42 (2:1 Hexanes:Benzene). All spectral data are consistent with those previously reported.<sup>11</sup>

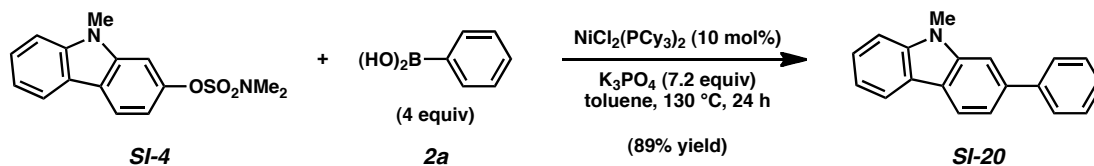

**SI-20 (Table 9, entry 3).** Purification by flash chromatography (4:1 Hexanes:EtOAc) afforded **SI-20** as a white solid (89% yield).  $R_f$  0.74 (4:1 Hexanes:EtOAc). All spectral data are consistent with those previously reported.<sup>12</sup>

<sup>11</sup> Quasdorf, K. W.; Riener, M.; Petrova, K. V.; Garg, N. K. *J. Am. Chem. Soc.* **2009**, *131*, 17748–17749.

<sup>12</sup> Kong, W.; Fu, C.; Ma, S. *Chem. Commun.* **2009**, 4572–4574.

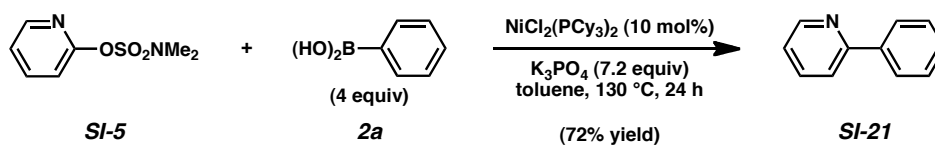

**SI-21 (Table 9, entry 4).** Purification by flash chromatography (4:1 Hexanes:EtOAc) afforded **SI-21** as a white solid (72% yield).  $R_f$  0.52 (2:1 Hexanes:EtOAc). All spectral data are consistent with those previously reported.<sup>13</sup>

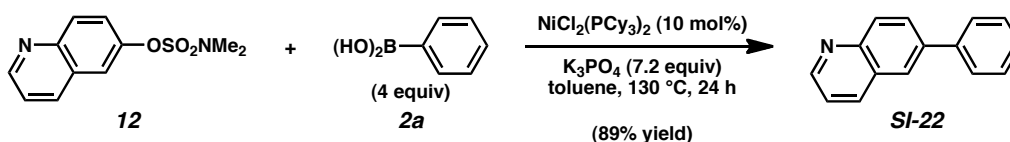

**SI-22 (Table 9, entry 5).** Purification by flash chromatography (1:1 Hexanes:Benzene) afforded **SI-22** as a white solid (89% yield).  $R_f$  0.35 (1:1 Hexanes:EtOAc). All spectral data are consistent with those previously reported.<sup>14</sup>

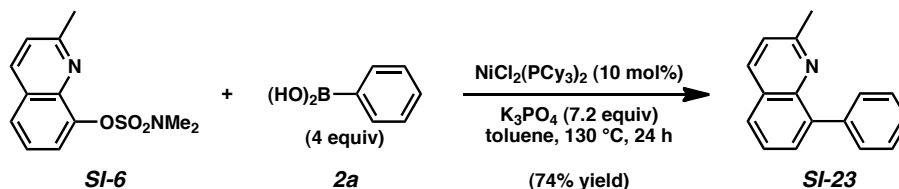

**SI-23 (Table 9, entry 6).** Purification by flash chromatography (4:1 Hexanes:EtOAc) afforded **SI-23** as a white solid (74% yield).  $R_f$  0.62 (4:1 Hexanes:EtOAc);  $^1\text{H}$ NMR (500 MHz,  $\text{CDCl}_3$ ):  $\delta$  8.09 (d,  $J$  = 8.0, 1H), 7.87-7.84 (m, 2H), 7.82-7.76 (m, 2H), 7.58-7.52 (m, 3H), 7.48-7.43 (m, 1H), 7.31 (d,  $J$  = 8.0, 1H), 2.79 (s, 3H);  $^{13}\text{C}$ NMR (125MHz,  $\text{CDCl}_3$ ):  $\delta$  158.5, 145.3, 139.7, 139.5, 136.0, 130.9, 130.1, 127.6, 127.1, 126.9, 126.7, 125.2, 121.6, 25.5; IR (film): 3050, 1612, 1600, 1496, 1326, 1238  $\text{cm}^{-1}$ ; HRMS-ESI ( $m/z$ ) [ $\text{M} + \text{Na}$ ] $^+$  calcd for  $\text{C}_{16}\text{H}_{14}\text{N}$ , 220.1126; found, 220.1126.

<sup>13</sup> Sprouse, S.; King, K. A.; Spellane, P. J.; Watts, R. J. *J. Am. Chem. Soc.* **1984**, *106*, 6647–6653.

<sup>14</sup> So, C. M.; Lau, C. P.; Kwong, F. Y. *Angew. Chem. Int. Ed.* **2008**, *47*, 8059–8063.

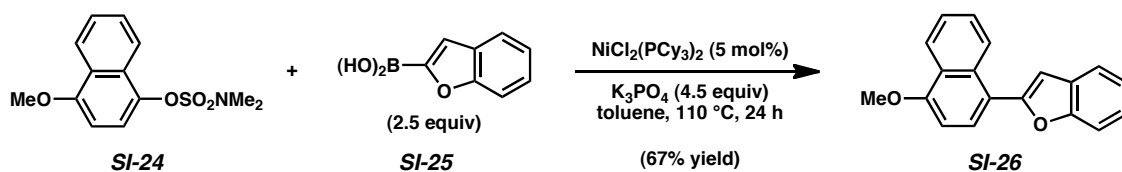

**SI-26 (Table 10, entry 1).** Purification by flash chromatography (4:1 Hexanes:EtOAc) afforded **SI-26** as a yellow oil (67% yield).  $R_f$  0.58 (4:1 Hexanes:EtOAc);  $^1\text{H NMR}$  (400 MHz,  $\text{CDCl}_3$ ):  $\delta$  8.42 (d,  $J = 8.5$ , 1H), 8.38 (d,  $J = 8.3$ , 1H), 7.82 (d,  $J = 8.1$ , 1H), 7.66 (d,  $J = 7.5$ , 1H), 7.61-7.53 (m, 3H), 7.35-7.25 (m, 2H), 7.00 (s, 3H), 6.91 (d,  $J = 8.1$ , 1H), 4.07 (s, 3H);  $^{13}\text{C NMR}$  (125MHz,  $\text{CDCl}_3$ ):  $\delta$  156.3, 156.0, 154.8, 131.7, 129.2, 127.9, 127.3, 125.7, 125.4, 125.2, 123.9, 122.8, 122.4, 120.8, 120.7, 111.1, 104.7, 103.4, 55.6; IR (film): 2934, 1584, 1448, 1246, 1080  $\text{cm}^{-1}$ ; HRMS-ESI ( $m/z$ )  $[\text{M} + \text{H}]^+$  calcd for  $\text{C}_{19}\text{H}_{15}\text{O}_2$ , 275.1072; found, 275.1078.

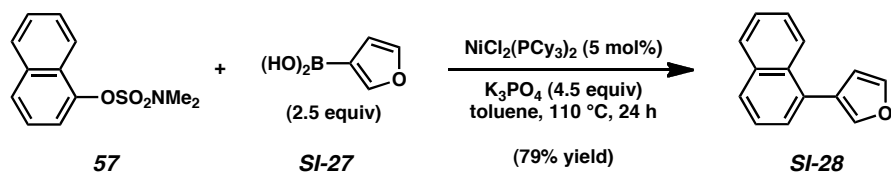

**SI-28 (Table 10, entry 2).** Purification by flash chromatography (100% Hexanes) afforded **SI-28** as a white solid (79% yield).  $R_f$  0.62 (100% Hexanes). All spectral data are consistent with those previously reported.<sup>15</sup>

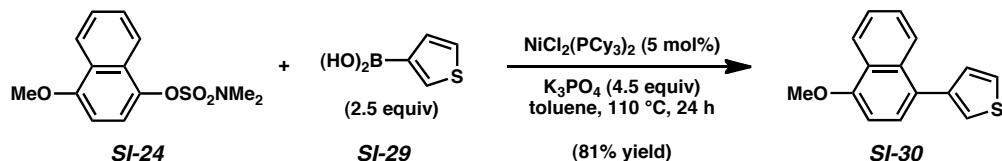

**SI-30 (Table 10, entry 3).** Purification by flash chromatography (2:1 Hexanes:EtOAc) afforded **SI-30** as a yellow oil (81% yield).  $R_f$  0.55 (1:1 Hexanes:EtOAc);  $^1\text{H NMR}$  (400 MHz,  $\text{CDCl}_3$ ):  $\delta$  8.35-8.33 (m, 1H), 8.00-7.97 (m, 1H), 7.52-7.43 (m, 3H), 7.40 (d,  $J = 7.9$ , 1H), 7.34 (dd,  $J = 3.0$ ,  $J = 1.3$ , 1H), 7.28 (dd,  $J = 4.9$ , 1.3, 1H), 6.85, (d,  $J = 8.7$ , 1H), 4.05 (s, 3H);  $^{13}\text{C NMR}$  (125MHz,  $\text{CDCl}_3$ ):  $\delta$  155.0,

<sup>15</sup> Molander, G. A.; Biolatto, B. *J. Org. Chem.* **2003**, *68*, 4302–4314.

141.2, 132.6, 129.7, 127.3, 126.8, 126.6, 125.6, 125.5, 125.1, 125.0, 122.9, 122.2, 103.3, 55.5; IR (film): 2933, 1578, 1458, 1232, 1101  $\text{cm}^{-1}$ ; HRMS-ESI ( $m/z$ )  $[\text{M} + \text{H}]^+$  calcd for  $\text{C}_{15}\text{H}_{12}\text{OS}$ , 241.0687; found, 241.0693.

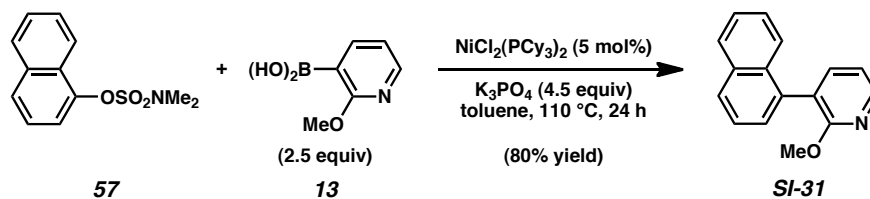

**SI-31 (Table 10, entry 4).** Purification by flash chromatography (10:1 Hexanes:EtOAc) afforded **SI-31** as a white solid (80% yield).  $R_f$  0.70 (10:1 Hexanes:EtOAc);  $^1\text{H}$ NMR (500 MHz,  $\text{CDCl}_3$ ):  $\delta$  8.32 (d,  $J = 5.0, 1.9$ , 1H), 7.93-7.90 (m, 2H), 7.61-7.42 (m, 6H), 7.06-7.03 (m, 1H), 3.98 (s, 3H);  $^{13}\text{C}$ NMR (125 MHz,  $\text{CDCl}_3$ ):  $\delta$  161.6, 146.3, 140.1, 134.9, 133.5, 131.7, 128.2, 128.2, 127.4, 125.9, 125.8, 125.7, 125.3, 123.5, 116.6, 53.4; IR (film): 2945, 1578, 1459, 1362, 1174  $\text{cm}^{-1}$ ; HRMS-ESI ( $m/z$ )  $[\text{M} + \text{H}]^+$  calcd for  $\text{C}_{16}\text{H}_{13}\text{NO}$ , 236.1075; found, 236.1082.

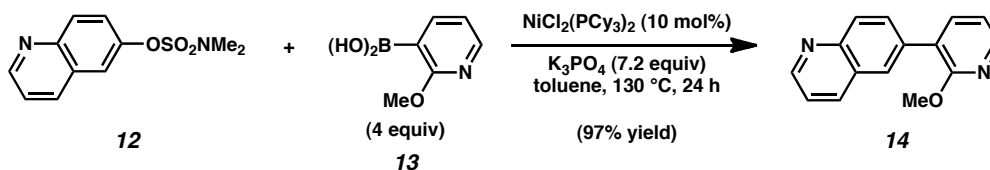

**Biaryl 14.** Purification by flash chromatography (10:1 Hexanes:EtOAc) afforded **14** as a white solid (97% yield).  $R_f$  0.70 (10:1 Hexanes:EtOAc);  $^1\text{H}$ NMR (500 MHz,  $\text{CDCl}_3$ ):  $\delta$  8.85 (dd,  $J = 4.0, 1.4$ , 1H), 8.15 (dd,  $J = 5.0, 1.8$ , 1H), 8.11-8.07 (m, 2H), 7.88-7.86 (m, 2H), 7.62 (dd,  $J = 7.3, 1.8$ , 1H), 7.31 (q,  $J = 4.2$ , 1H), 6.95-6.92 (dd,  $J = 7.3, 5.0$ , 1H), 3.95 (s, 3H);  $^{13}\text{C}$ NMR (125 MHz,  $\text{CDCl}_3$ ):  $\delta$  160.8, 150.4, 147.5, 146.1, 138.7, 136.0, 135.0, 130.8, 128.9, 128.0, 127.7, 123.6, 121.2, 117.1, 53.5; IR (film): 3046, 2945, 1578, 1461, 1403, 1018  $\text{cm}^{-1}$ ; HRMS-ESI ( $m/z$ )  $[\text{M} + \text{H}]^+$  calcd for  $\text{C}_{15}\text{H}_{13}\text{NO}$ , 237.1028; found, 237.1025.

### C. Mechanistic and Competition Experiments

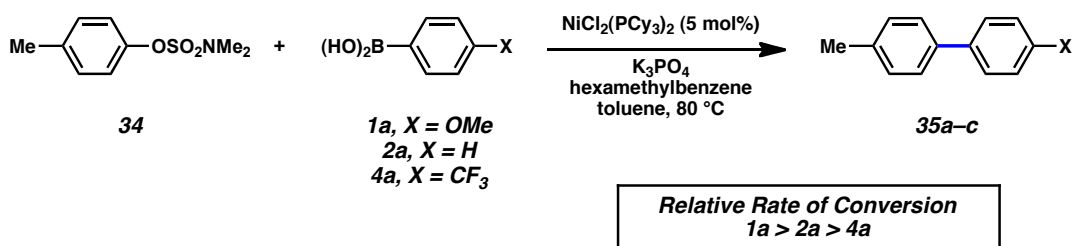

**Influence of boronic acid on the reaction rate.** To determine the influence of boronic acid identity on reaction rate, sulfamate **34** was allowed to react independently with boronic acids **1a**, **2a**, and **4a**. To monitor progress over time, in each case, five reactions were setup simultaneously under identical reaction conditions. These reactions were removed from heat at varying time points (15 min, 45 min, 90 min, 3 h, 6 h) and the percentage conversions were determined by  $^1\text{H}$  NMR analysis with hexamethylbenzene as internal standard. The results shown below indicate that the relative rate of cross-coupling is dependent on the identity of the boronic acid, with a direct correlation between electron-richness of the boronic acid and reaction rate (i.e., rate of conversion: **1a**>**2a**>**4a**).

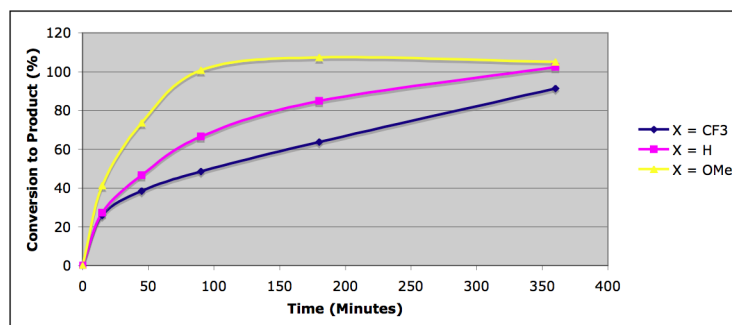

#### Representative procedure (coupling of sulfamate **34** with boronic acid **2a** is used as an example).

A 1-dram vial was charged with anhydrous powdered  $\text{K}_3\text{PO}_4$  (419 mg, 1.98 mmol, 4.5 equiv, *obtained from Acros*) and a magnetic stir bar. The vial and contents were flame-dried under reduced pressure, and then allowed to cool under  $\text{N}_2$ . Boronic acid **2a** (134 mg, 1.10 mmol, 2.5 equiv),  $\text{NiCl}_2(\text{PCy}_3)_2$  (15 mg, 0.0219 mmol, 5 mol%), and the sulfamate substrate **34** (94 mg, 0.439 mmol, 1 equiv) were added. The vial was then evacuated and backfilled with  $\text{N}_2$ . 1.5 mL of a 4.6 mg/mL solution of hexamethylbenzene in toluene was added and the vial was sealed with a Teflon-lined screw cap. The heterogeneous mixture was allowed to stir at  $23^\circ\text{C}$  for 1 h, and then heated to  $80^\circ\text{C}$  for the desired time indicated above. The reaction vessel was then immediately opened and the contents transferred to a test tube containing 1 M HCl (5 mL) and  $\text{Et}_2\text{O}$  (5 mL).  $\text{Et}_2\text{O}$  (1 mL) and  $\text{H}_2\text{O}$  (1 mL) were used to

dissolve and transfer residual solids to the test tube. The layers were separated and the aqueous layer was extracted with Et<sub>2</sub>O (3x5 mL). The combined organic layers were dried over MgSO<sub>4</sub>. A sample (1.5 mL) was taken, and the solvent was removed under reduced pressure. The residue was dissolved in CDCl<sub>3</sub>; the resulting solution was subjected to filtration through a cotton plug and analyzed by <sup>1</sup>H NMR.

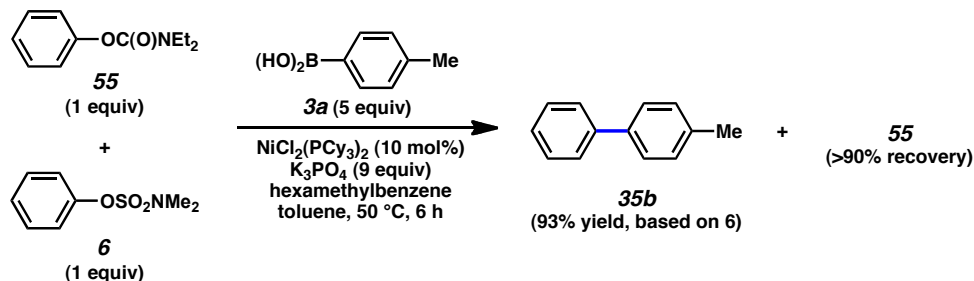

**Sulfamate-selective coupling using aryl substrates.** Experiments were carried out to effect the selective cross-coupling of aryl sulfamate **6** without effecting reaction of aryl carbamate **55**. To monitor progress over time, five reactions were setup simultaneously under identical reaction conditions. These reactions were removed from heat at varying time points (15 min, 45 min, 90 min, 3 h, 6 h) and the percentage conversions were determined by <sup>1</sup>H NMR analysis with hexamethylbenzene internal standard. The results shown below indicate that selective sulfamate coupling was readily achieved at 50 °C reaction temperature.

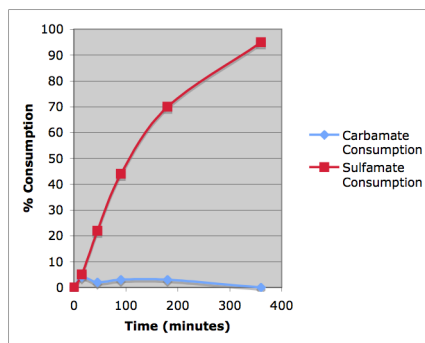

**Procedure:** A 1-dram vial was charged with anhydrous powdered  $\text{K}_3\text{PO}_4$  (380 mg, 1.79 mmol, 9 equiv, obtained from Acros) and a magnetic stir bar. The vial and contents were flame-dried under reduced pressure, then allowed to cool under  $\text{N}_2$ . Boronic acid **3a** (135 mg, 1.00 mmol, 5 equiv),  $\text{NiCl}_2(\text{PCy}_3)_2$  (13.8 mg, 0.02 mmol, 10 mol%) were added. The vial was then evacuated and backfilled with  $\text{N}_2$ . A solution containing sulfamate **6** (40 mg, 0.20 mmol, 1 equiv), carbamate **55** (38 mg, 0.20

mmol, 1 equiv) and hexamethylbenzene (4.9 mg, 0.03 mmol, 15 mol%) in toluene (1.5 mL) was added and the vial was sealed with a Teflon-lined screw cap. The heterogeneous mixture was stirred at 23 °C for 1 h, then heated to 50 °C for the desired time indicated above. The reaction vessel was then immediately opened and the contents transferred to a test tube containing 1 M HCl (5 mL) and ethyl acetate (5 mL). Ethyl acetate (1 mL) and H<sub>2</sub>O (1 mL) were used to dissolve and transfer residual solids to the test tube. The layers were separated and the aqueous layer was extracted with ethyl acetate (3x5 mL). The combined organic layers were dried over MgSO<sub>4</sub>. A sample (1.5 mL) was evaporated to dryness under reduced pressure. The residue was dissolved in CDCl<sub>3</sub> and analyzed by <sup>1</sup>H NMR.

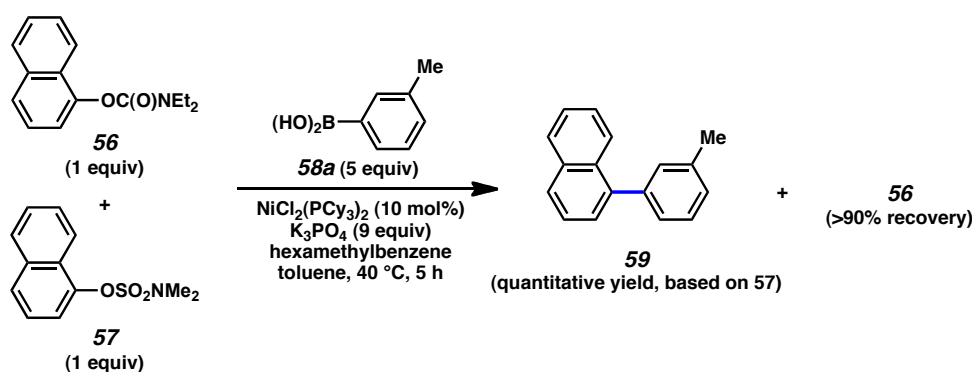

**Sulfamate-selective coupling using fused aromatic substrates.** Experiments were carried out to effect the selective cross-coupling of aryl sulfamate **57** without disturbing aryl carbamate **56**. To monitor progress over time, two reactions were setup simultaneously under identical reaction conditions. These reactions were stopped at varying time points (65 min and 5 h) and the percentage conversions were determined by <sup>1</sup>H NMR analysis with hexamethylbenzene internal standard. The results shown below indicate that selective sulfamate coupling was readily achieved at 40 °C reaction temperature.

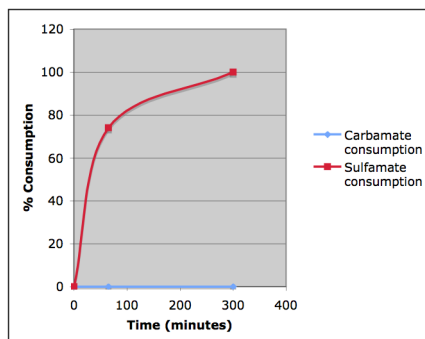



**Procedure:** A 1-dram vial was charged with anhydrous powdered  $K_3PO_4$  (119 mg, 0.90 mmol, 9 equiv, *obtained from Acros*) and a magnetic stir bar. The vial and contents were flame-dried under reduced pressure, then allowed to cool under  $N_2$ . Boronic acid **58a** (68 mg, 0.50 mmol, 0.5 equiv),  $NiCl_2(PCy_3)_2$  (6.9 mg, 0.01 mmol, 10 mol%) were added. The vial was then evacuated and backfilled with  $N_2$ . A solution containing sulfamate **57** (25 mg, 0.10 mmol, 1 equiv), carbamate **56** (24 mg, 0.10 mmol, 1 equiv), and hexamethylbenzene (2.4 mg, 0.02 mmol, 15 mol%) in toluene (0.7 mL) was added and the vial was sealed with a Teflon-lined screw cap. The heterogeneous mixture was allowed to stir at 23 °C for 1 h, then heated to 40 °C for the desired time indicated above. The reaction vessel was then cooled, immediately opened and the contents transferred to a test tube containing 1 M HCl (5 mL) and ethyl acetate (5 mL). Ethyl acetate (1 mL) and  $H_2O$  (1 mL) were used to dissolve and transfer residual solids to the test tube. The layers were separated and the aqueous layer was extracted with ethyl acetate (3x5 mL). The combined organic layers were dried over  $MgSO_4$ . A sample (1.5 mL) was evaporated to dryness under reduced pressure. The residue was dissolved in  $CDCl_3$  and analyzed by  $^1H$  NMR.

# **<sup>1</sup>H NMR Spectra**

Current Data Parameters  
 NAME AS-1-62\_R  
 EXPNO 1  
 PROCNO 1

F2 - Acquisition Parameters  
 Date\_ 20100502  
 Time\_ 17.03  
 INSTRUM aix500  
 PROBHD 5 mm broadband  
 PULPROG zg30  
 TD 65536  
 SOLVENT CDCI3  
 NS 16  
 DS 0  
 SWH 10000.000 Hz  
 FIDRES 0.152588 Hz  
 AQ 3.2768500 sec  
 RG 2860  
 DW 50.000 usec  
 DE 71.43 usec  
 TE 300.0 K  
 D1 2.0000000 sec  
 P1 11.00 usec  
 SFO1 500.1330008 MHz  
 NUCLEUS 1H

F2 - Processing parameters  
 SI 32768  
 SF 500.1300237 MHz  
 WDW EM  
 SSB 0  
 LB 0.30 Hz  
 GB 0  
 PC 1.00

aull proton paramet

8.188  
8.187  
8.172  
8.170  
8.170  
7.885  
7.870  
7.778  
7.761  
7.595  
7.592  
7.581  
7.578  
7.575  
7.565  
7.561  
7.556  
7.554  
7.541  
7.539  
7.528  
7.525  
7.476  
7.460  
7.444  
7.260

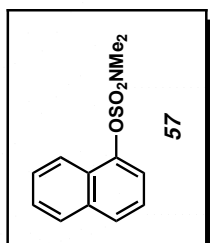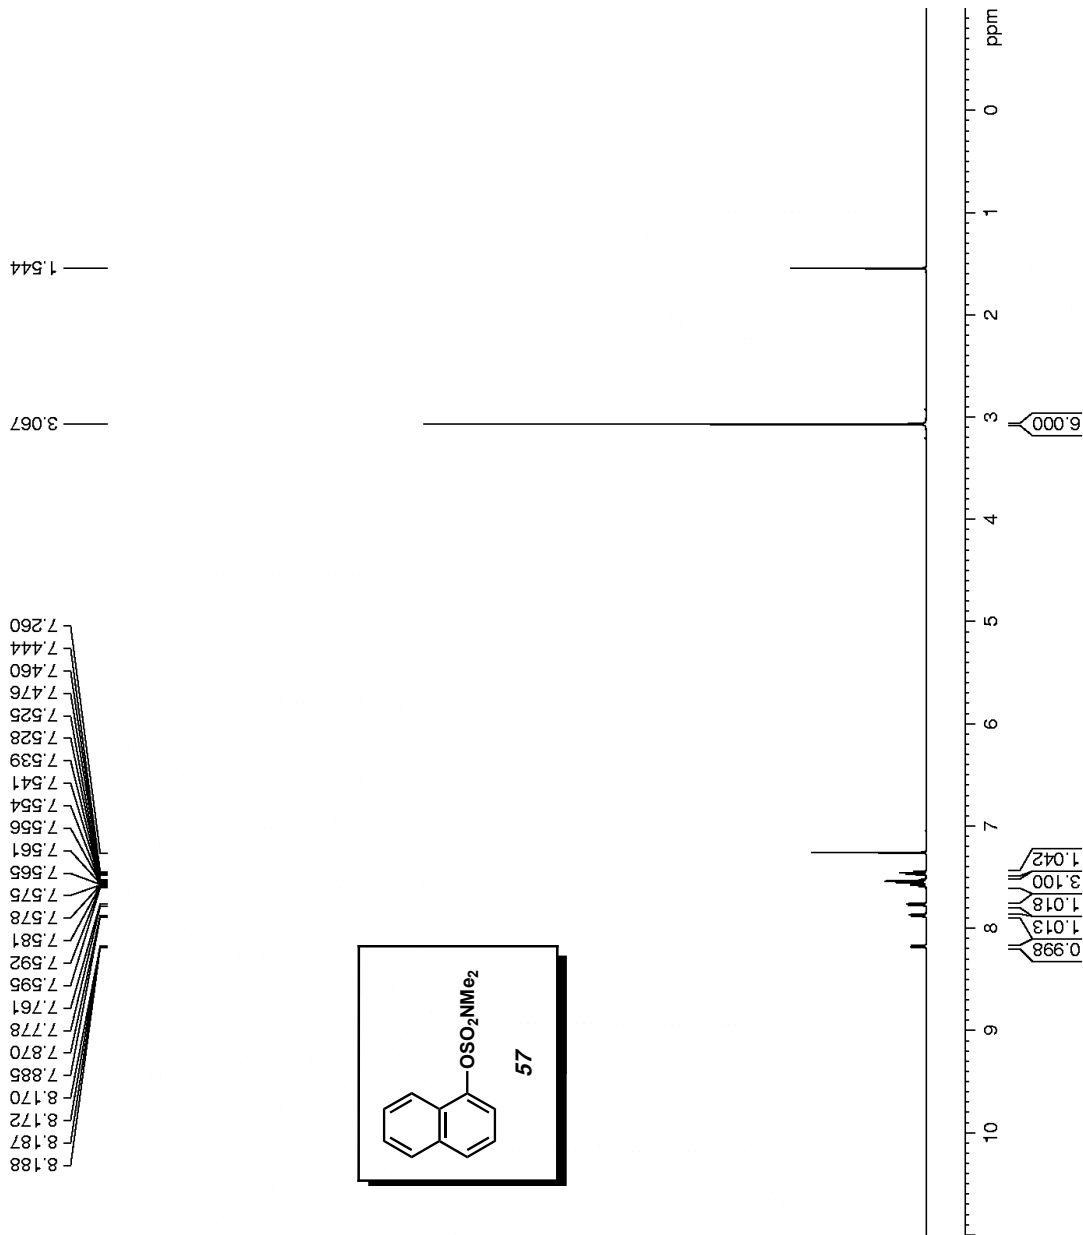

Current Data Parameters  
 NAME SDR1-188  
 EXPNO 15  
 PROCNO 1

F2 - Acquisition Parameters  
 Date\_ 20100509  
 Time\_ 19.42  
 INSTRUM arx500  
 PROBHD 5 mm broadband  
 PULPROG zg30  
 TD 65536  
 SOLVENT CDCl3  
 NS 8  
 DS 0  
 SWH 10000.000 Hz  
 FIDRES 0.152588 Hz  
 AQ 3.2768500 sec  
 RG 1024  
 DW 50.000 usec  
 DE 71.43 usec  
 TE 300.0 K  
 D1 2.00000000 sec  
 P1 11.00 usec  
 SFO1 500.1330008 MHz  
 NUCLEUS 1H

F2 - Processing parameters  
 SI 32768  
 SF 500.1300240 MHz  
 WDW EM  
 SSB 0  
 LB 0.30 Hz  
 GB 0  
 PC 1.00

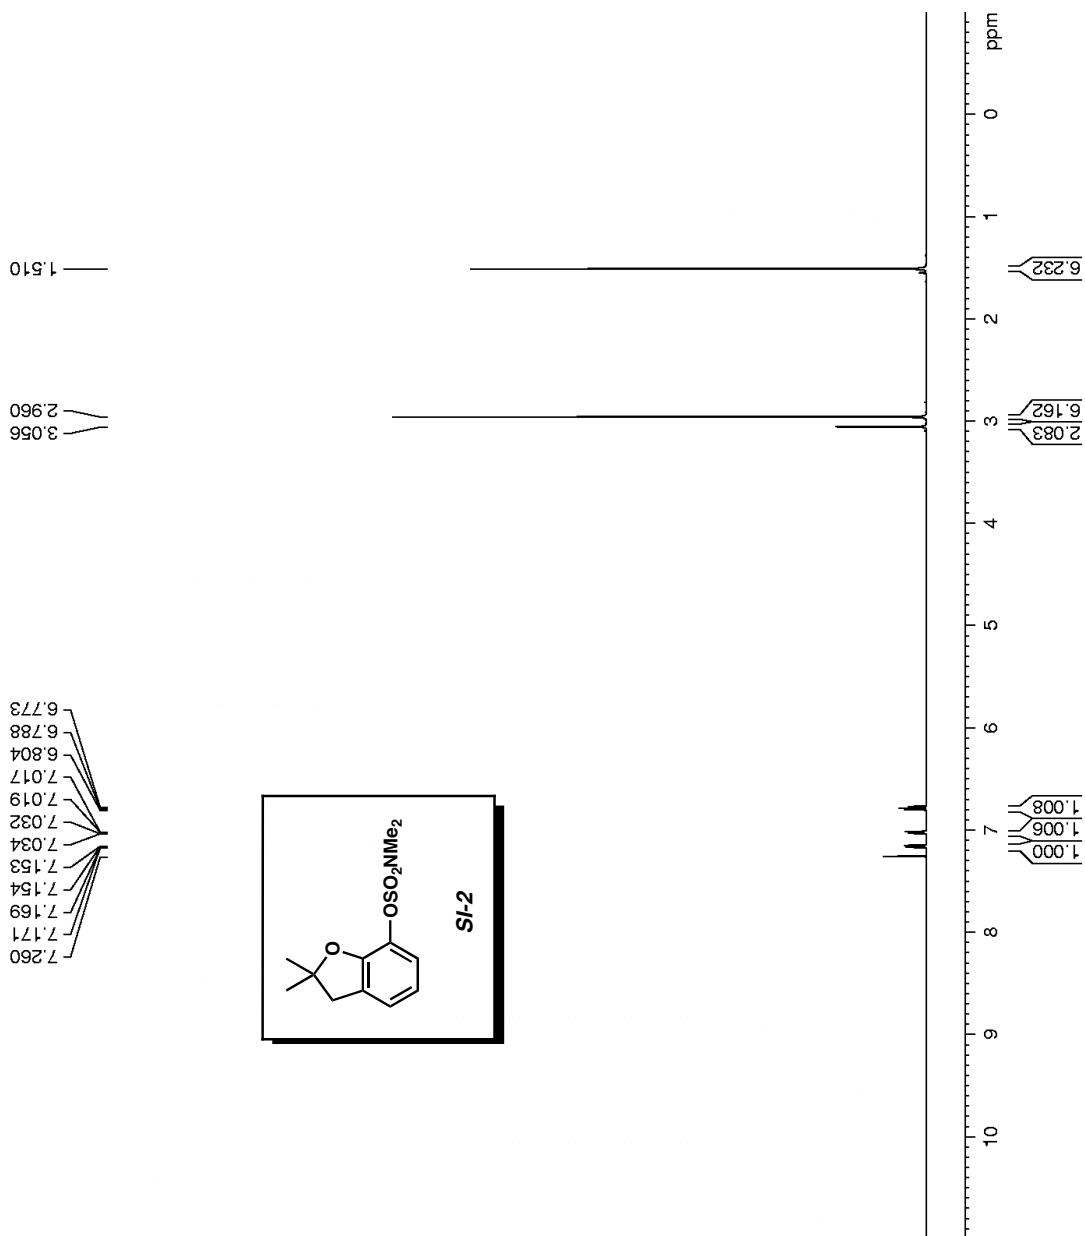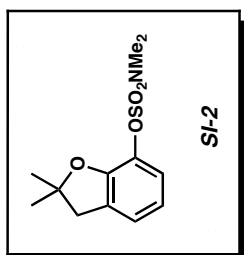

Current Data Parameters  
 NAME KQ3-50  
 EXPNO 3  
 PROCNO 1

F2 - Acquisition Parameters  
 Date\_ 20090220  
 Time\_ 17.35  
 INSTRUM arx500  
 PROBHD 5 mm broadband  
 PULPROG zg30  
 TD 65536  
 SOLVENT CDCl3  
 NS 9  
 DS 0  
 SWH 10000.000 Hz  
 FIDRES 0.152588 Hz  
 AQ 3.2768500 sec  
 RG 2860  
 DW 50.000 usec  
 DE 71.43 usec  
 TE 300.0 K  
 D1 2.00000000 sec  
 P1 11.00 usec  
 SFO1 500.1330008 MHz  
 NUCLEUS 1H

F2 - Processing parameters  
 SI 32768  
 SF 500.1300187 MHz  
 WDW EM  
 SSB 0  
 LB 0.30 Hz  
 GB 0  
 PC 1.00

Purified Product

7.540  
7.536  
7.307  
7.289  
7.181  
7.176  
7.163  
7.158  
7.121  
7.115  
6.498  
6.492

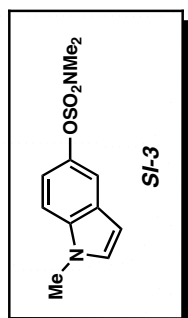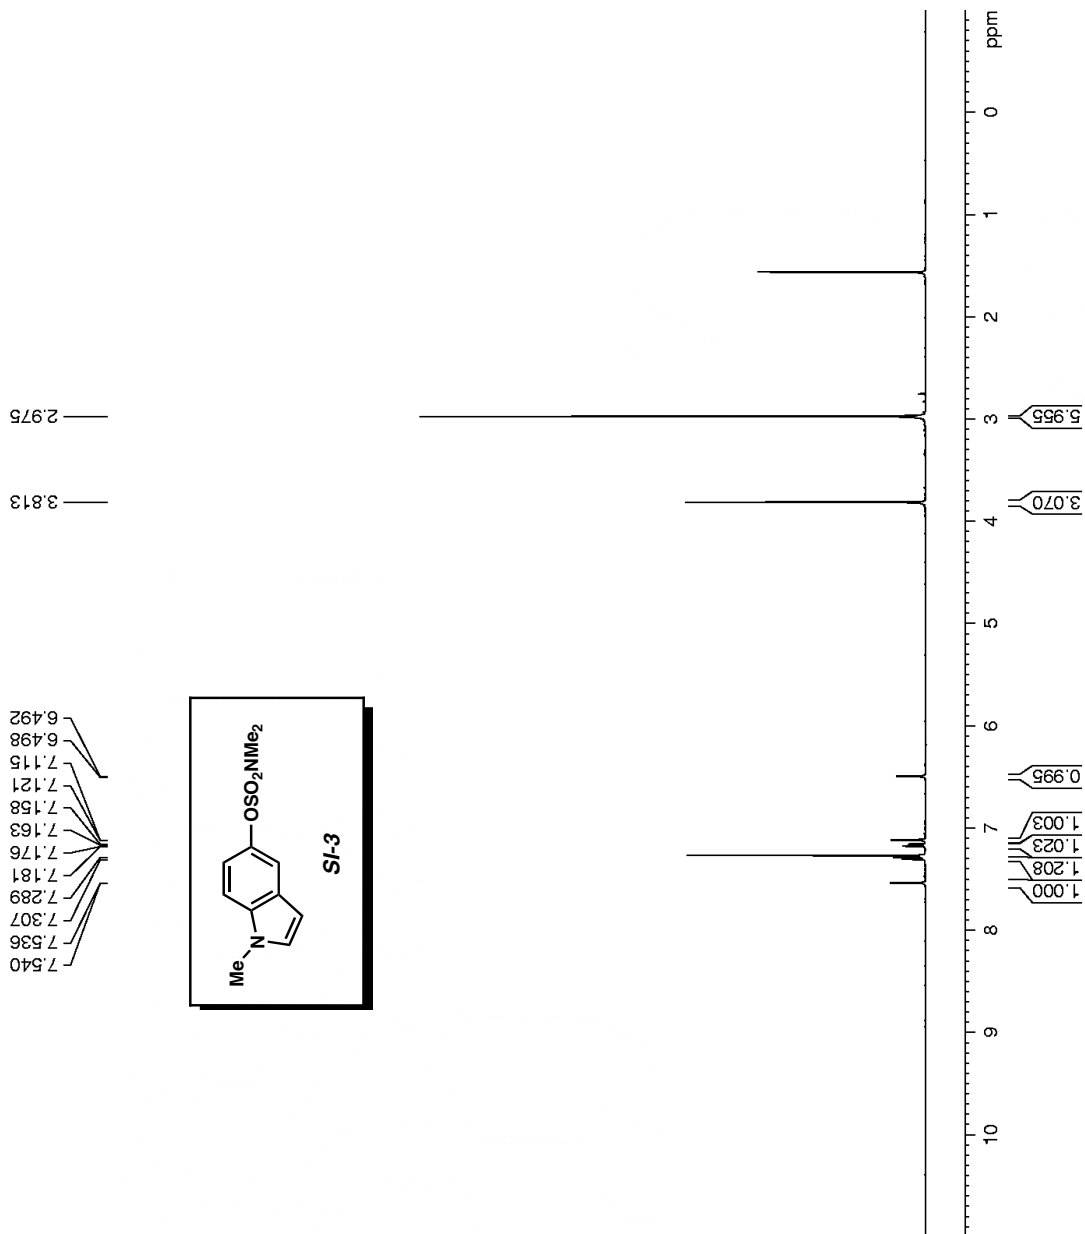

Current Data Parameters  
 NAME ak-1-54  
 EXPNO 1  
 PROCNO 1

F2 - Acquisition Parameters  
 Date\_ 20100414  
 Time\_ 0.22  
 INSTRUM avance500  
 PROBHD 5 mm bb-Z Z800  
 PULPROG zg30  
 TD 65536  
 SOLVENT CDCI3  
 NS 8  
 DS 0  
 SWH 10000.000 Hz  
 FIDRES 0.152588 Hz  
 AQ 3.2769001 sec  
 RG 90.5  
 DW 50.000 usec  
 DE 6.00 usec  
 TE 298.3 K  
 D1 2.00000000 sec  
 MCREST 0.00000000 sec  
 MCWRK 0.01500000 sec

===== CHANNEL f1 =====  
 NUC1 1H  
 P1 12.00 usec  
 PL1 0.00 dB  
 SFO1 500.3330020 MHz

F2 - Processing parameters  
 SI 32768  
 SF 500.3300220 MHz  
 WDW EM  
 SSB 0  
 LB 0.30 Hz  
 GB 0  
 PC 1.00

ault proton paramet

8.068  
8.056  
8.042  
7.508  
7.493  
7.479  
7.405  
7.389  
7.371  
7.278  
7.263  
7.143  
7.127

3.824

3.079  
3.016

1.581

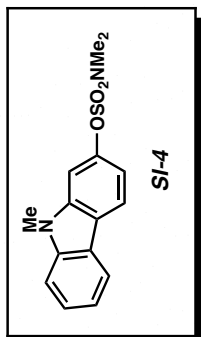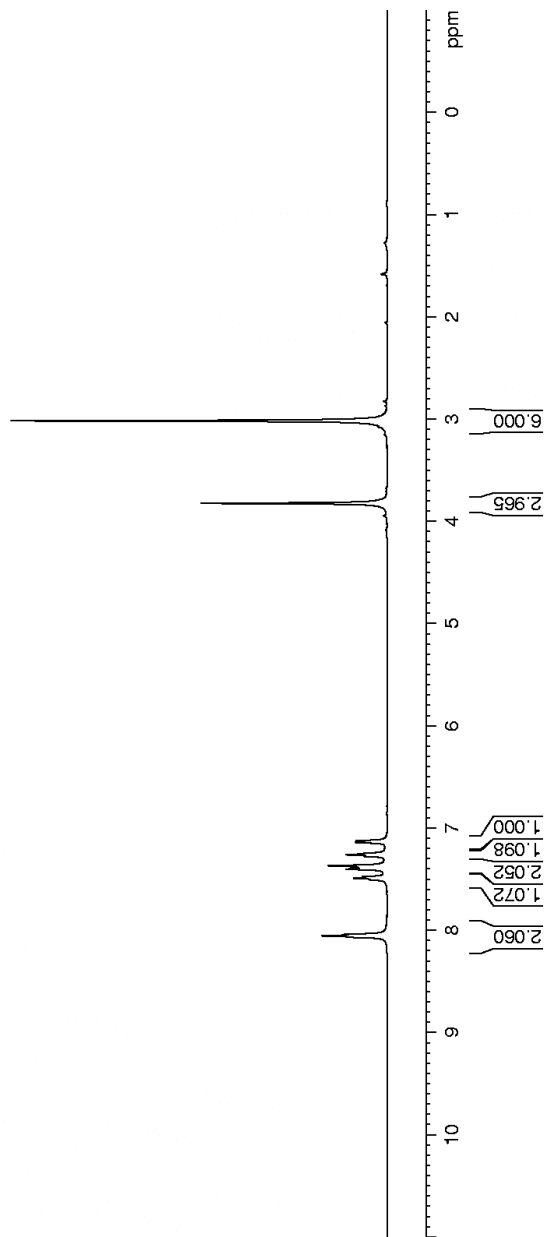

```

Current Data Parameters
NAME      AS1-27
EXPNO    10
PROCNO   1

F2 - Acquisition Parameters
Date_    20100508
Time     19:55
INSTRUM  avance500
PROBHD   5 mm bb-Z800
PULPROG  zg30
TD        65536
SOLVENT  CDCl3
NS        8
DS        0
SWH      10000.000 Hz
FIDRES   0.152588 Hz
AQ        3.2769001 sec
RG        45.3
DW        50.000 usec
DE        6.00 usec
TE        298.7 K
D1        2.00000000 sec
MCREST   0.00000000 sec
MCWRK    0.01500000 sec

===== CHANNEL f1 =====
NUC1      1H
P1        12.00 usec
PL1       0.00 dB
SFO1     500.3330020 MHz

F2 - Processing parameters
SI        32768
SF        500.33300220 MHz
WDW       EM
SSB       0
LB        0.30 Hz
GB        0
PC        1.00
    
```

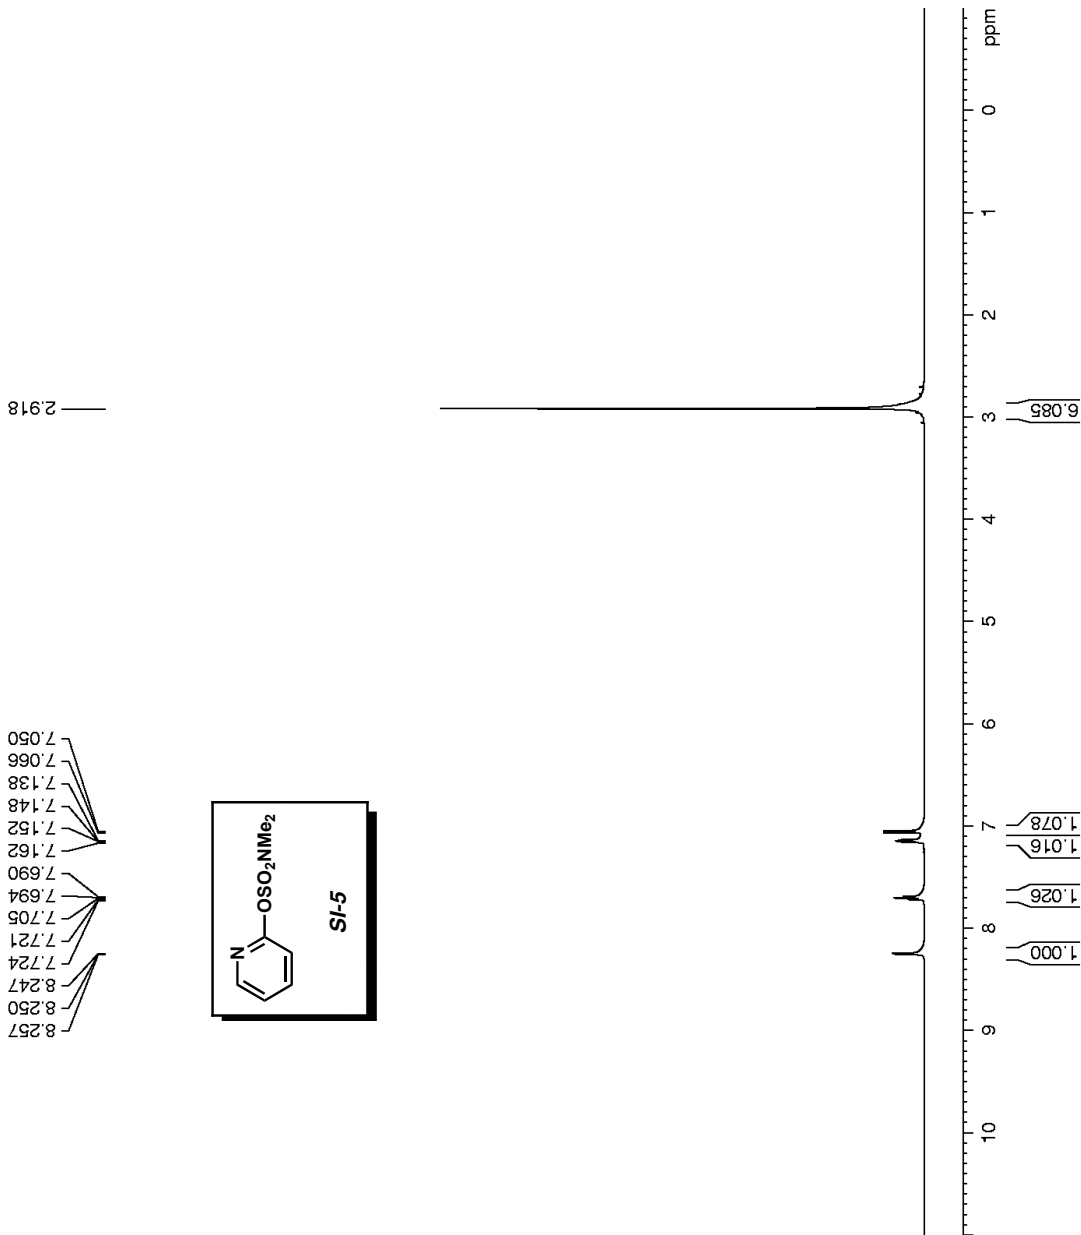

Current Data Parameters  
 NAME ak1-69  
 EXPNO 10  
 PROCNO 1

F2 - Acquisition Parameters  
 Date\_ 20100508  
 Time\_ 19.30  
 INSTRUM avance500  
 PROBHD 5 mm bb-Z Z800  
 PULPROG zg30  
 TD 65536  
 SOLVENT CDCI3  
 NS 8  
 DS 0  
 SWH 10000.000 Hz  
 FIDRES 0.152588 Hz  
 AQ 3.2769001 sec  
 RG 90.5  
 DW 50.000 usec  
 DE 6.00 usec  
 TE 298.6 K  
 D1 2.00000000 sec  
 MCREST 0.00000000 sec  
 MCWRK 0.01500000 sec

===== CHANNEL f1 =====  
 NUC1 1H  
 P1 12.00 usec  
 PL1 0.00 dB  
 SFO1 500.3330020 MHz

F2 - Processing parameters  
 SI 32768  
 SF 500.3300220 MHz  
 WDW EM  
 SSB 0  
 LB 0.30 Hz  
 GB 0  
 PC 1.00

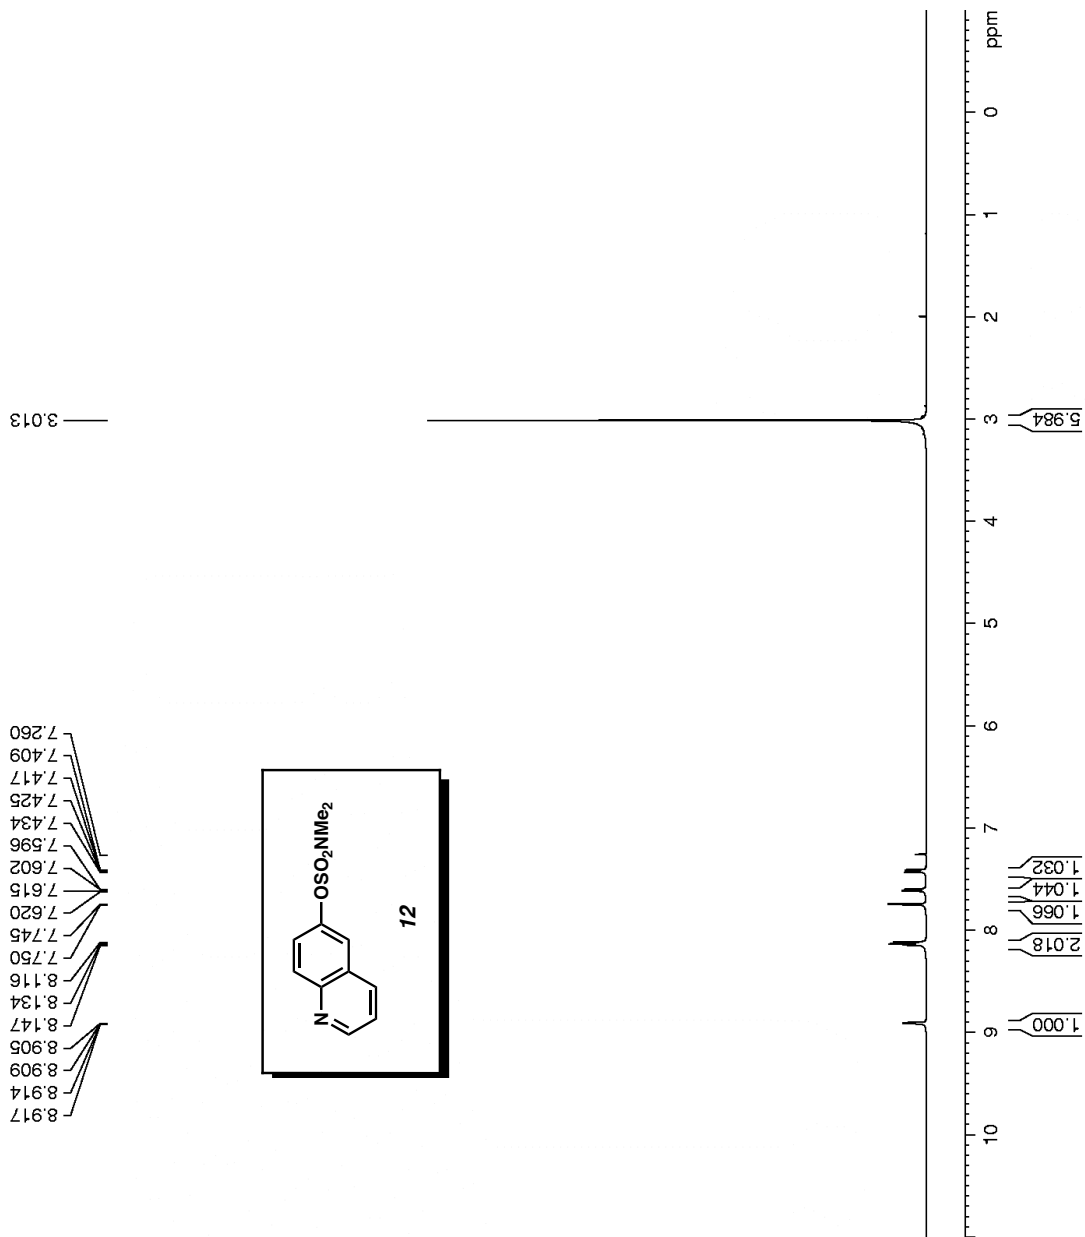



Current Data Parameters  
 NAME AK1-59  
 EXPNO 10  
 PROCNO 1

F2 - Acquisition Parameters  
 Date\_ 20100508  
 Time\_ 18.52  
 INSTRUM avance500  
 PROBHD 5 mm bb-Z Z800  
 PULPROG zg30  
 TD 65536  
 SOLVENT CDCI3  
 NS 8  
 DS 0  
 SWH 10000.000 Hz  
 FIDRES 0.152588 Hz  
 AQ 3.2769001 sec  
 RG 128  
 DW 50.000 usec  
 DE 6.00 usec  
 TE 298.5 K  
 D1 2.00000000 sec  
 MCREST 0.00000000 sec  
 MCWRK 0.01500000 sec

==== CHANNEL f1 =====  
 NUC1 1H  
 P1 12.00 usec  
 PL1 0.00 dB  
 SFO1 500.3330020 MHz

F2 - Processing parameters  
 SI 32768  
 SF 500.3300220 MHz  
 WDW EM  
 SSB 0  
 LB 0.30 Hz  
 GB 0  
 PC 1.00

2.764  
 3.040

7.259  
 7.329  
 7.346  
 7.446  
 7.462  
 7.478  
 7.686  
 7.702  
 7.733  
 7.749  
 8.047  
 8.064

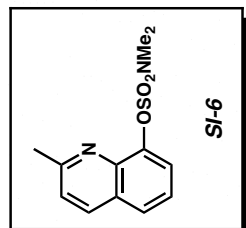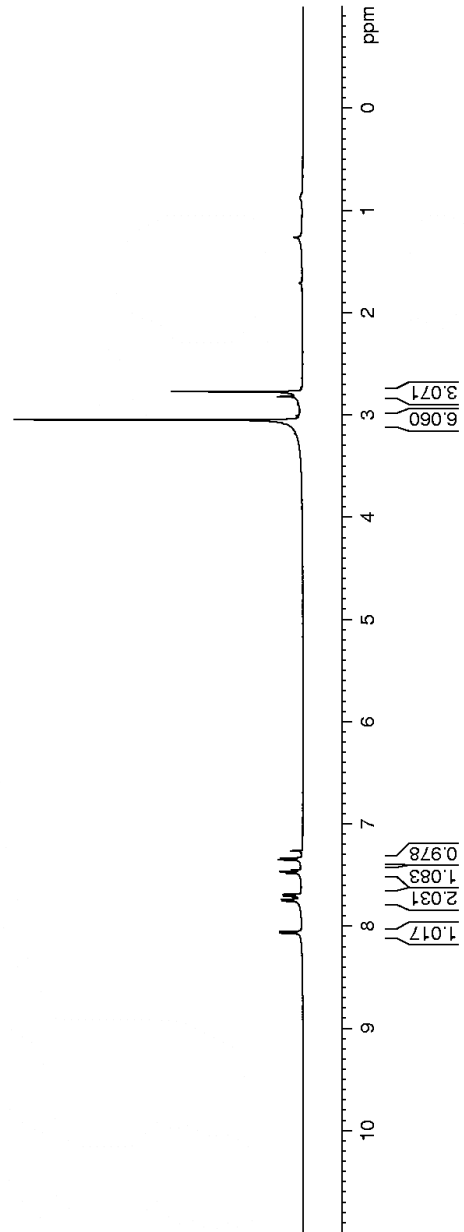

Current Data Parameters  
 NAME AS-1-66  
 EXPNO 1  
 PROCNO 1

F2 - Acquisition Parameters  
 Date\_ 20100325  
 Time\_ 3.45  
 INSTRUM avance500  
 PROBHD 5 mm bb-Z Z800  
 PULPROG zg30  
 TD 65536  
 SOLVENT CDCl3  
 NS 16  
 DS 0  
 SWH 10000.000 Hz  
 FIDRES 0.152588 Hz  
 AQ 3.2769001 sec  
 RG 287.4  
 DW 50.000 usec  
 DE 6.00 usec  
 TE 296.0 K  
 D1 2.00000000 sec  
 MCREST 0.00000000 sec  
 MCWRK 0.01500000 sec

===== CHANNEL f1 =====  
 NUC1 1H  
 P1 12.00 usec  
 PL1 0.00 dB  
 SFO1 500.3330020 MHz

F2 - Processing parameters  
 SI 32768  
 SF 500.33300225 MHz  
 WDW EM  
 SSB 0  
 LB 0.30 Hz  
 GB 0  
 PC 1.00

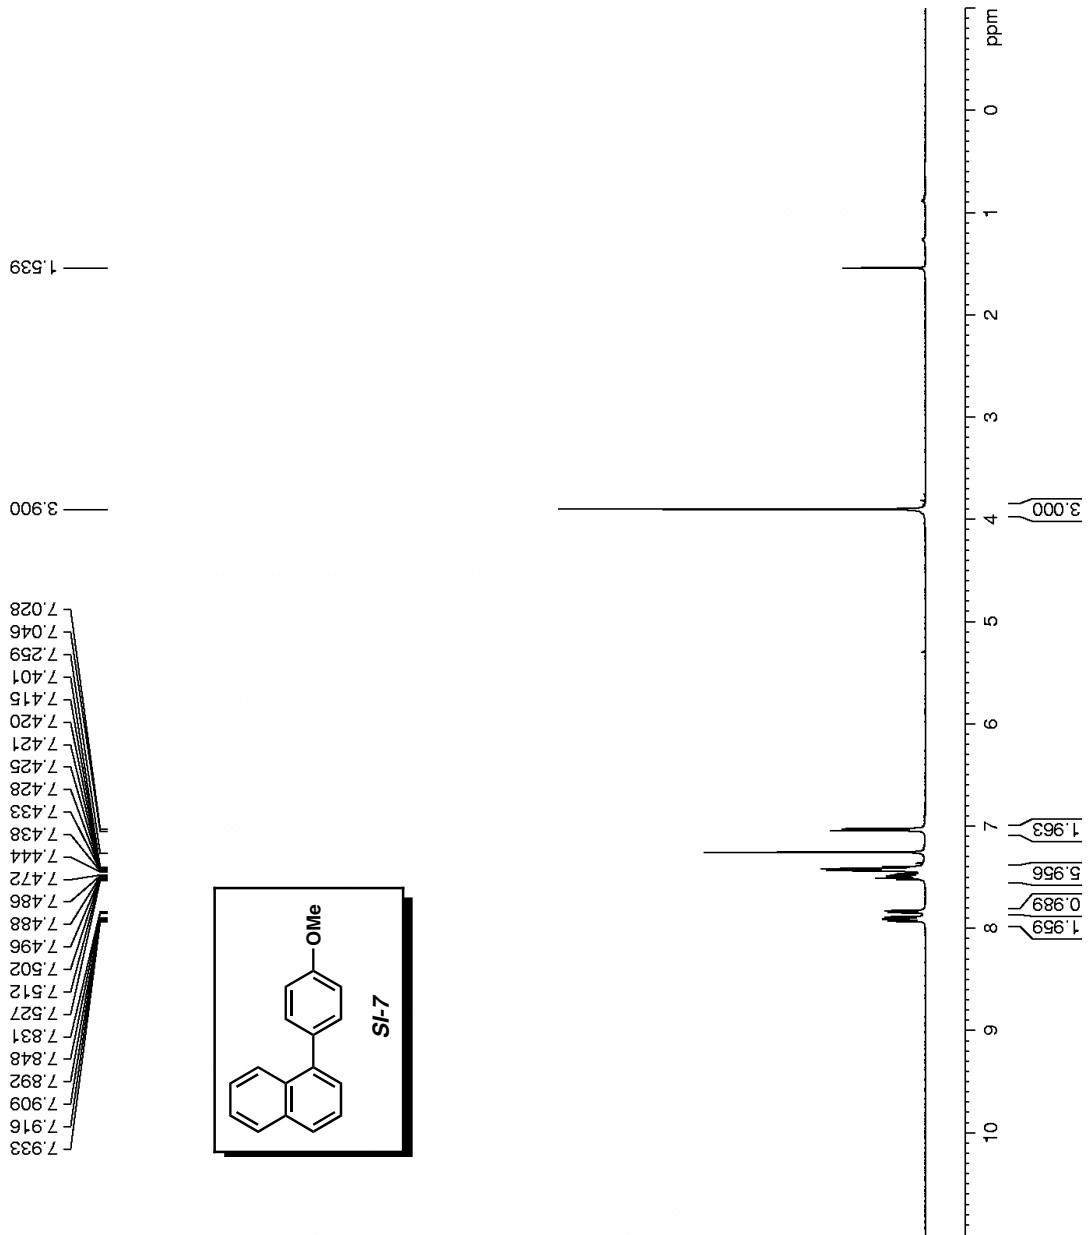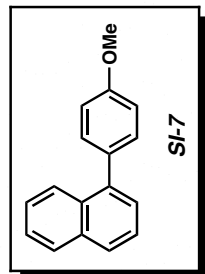

Current Data Parameters  
 NAME AS-1-76  
 EXPNO 1  
 PROCNO 1

F2 - Acquisition Parameters  
 Date\_ 20100401  
 Time\_ 17.38  
 INSTRUM avance500  
 PROBHD 5 mm bb-Z Z800  
 PULPROG zg30  
 TD 65536  
 SOLVENT CDC13  
 NS 16  
 DS 0  
 SWH 10000.000 Hz  
 FIDRES 0.152588 Hz  
 AQ 3.2769001 sec  
 RG 71.8  
 DW 50.000 usec  
 DE 6.00 usec  
 TE 295.6 K  
 D1 2.00000000 sec  
 MCREST 0.00000000 sec  
 MCWRK 0.01500000 sec

===== CHANNEL f1 =====  
 NUC1 1H  
 P1 12.00 usec  
 PL1 0.00 dB  
 SFO1 500.3330020 MHz

F2 - Processing parameters  
 SI 32768  
 SF 500.3300221 MHz  
 WDW EM  
 SSB 0  
 LB 0.30 Hz  
 GB 0  
 PC 1.00

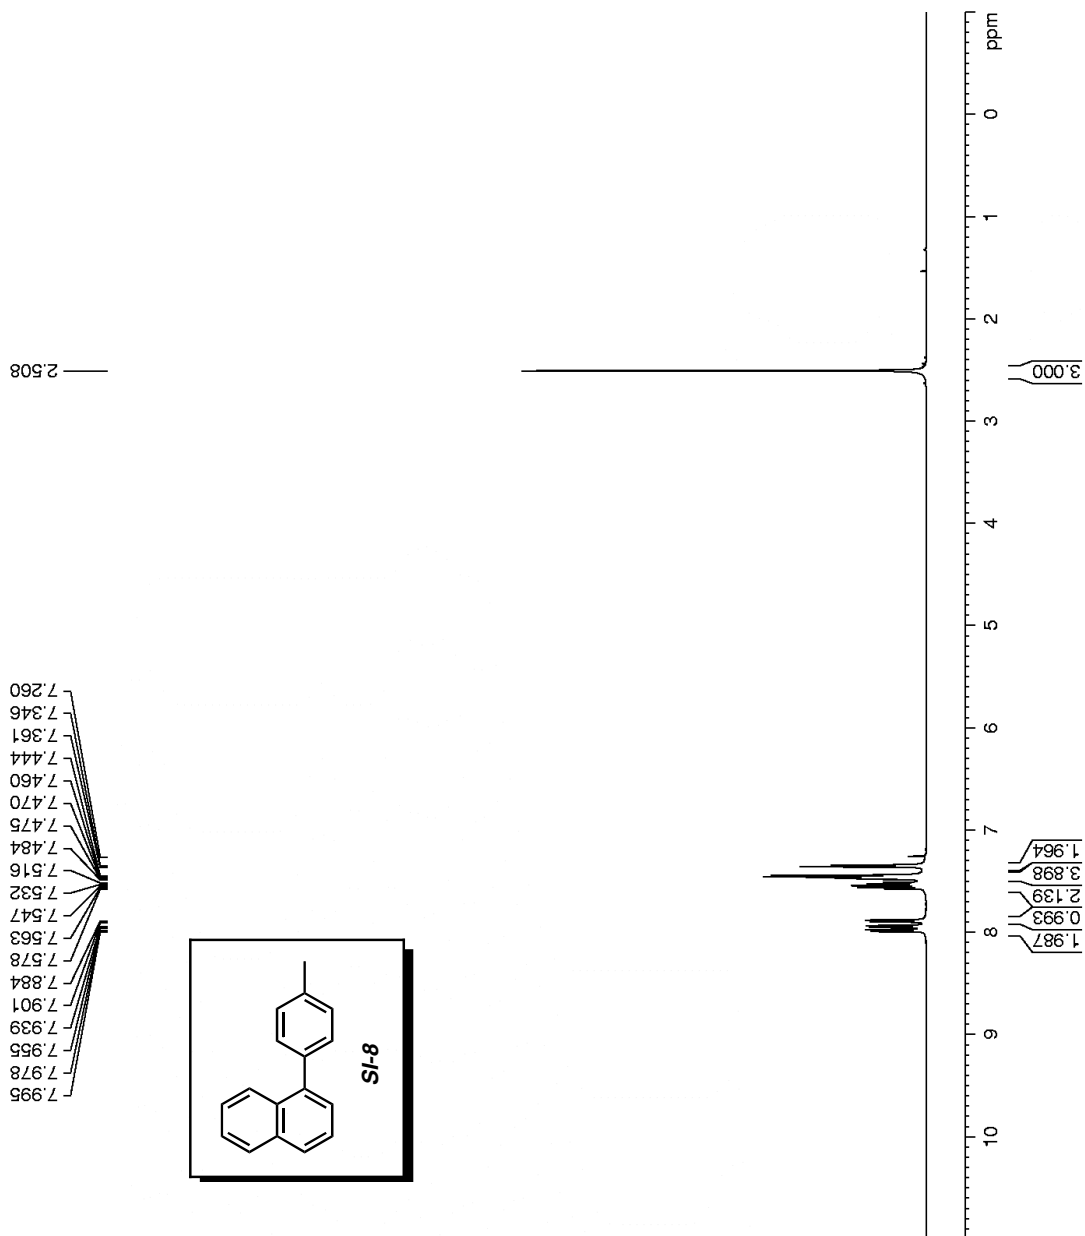

Current Data Parameters  
 NAME AS-1-74  
 EXPNO 1  
 PROCNO 1

F2 - Acquisition Parameters  
 Date\_ 20100401  
 Time\_ 17.34  
 INSTRUM avance500  
 PROBHD 5 mm bb-Z Z800  
 PULPROG zg30  
 TD 65536  
 SOLVENT CDCI3  
 NS 16  
 DS 0  
 SWH 10000.000 Hz  
 FIDRES 0.152588 Hz  
 AQ 3.2769001 sec  
 RG 57  
 DW 50.000 usec  
 DE 6.00 usec  
 TE 295.6 K  
 D1 2.00000000 sec  
 MCREST 0.00000000 sec  
 MCWRK 0.01500000 sec

==== CHANNEL f1 =====  
 NUC1 1H  
 P1 12.25 usec  
 PL1 0.00 dB  
 SFO1 500.3330020 MHz

F2 - Processing parameters  
 SI 32768  
 SF 500.3300223 MHz  
 WDW EM  
 SSB 0  
 LB 0.30 Hz  
 GB 0  
 PC 1.00

ault proton paramet

7.994  
7.977  
7.963  
7.947  
7.913  
7.896  
7.885  
7.570  
7.555  
7.541  
7.525  
7.497  
7.486  
7.472  
7.454  
7.439  
7.424  
7.380  
7.372  
7.357  
7.311  
7.297  
7.260

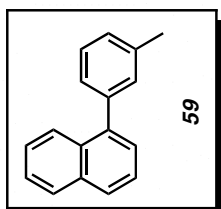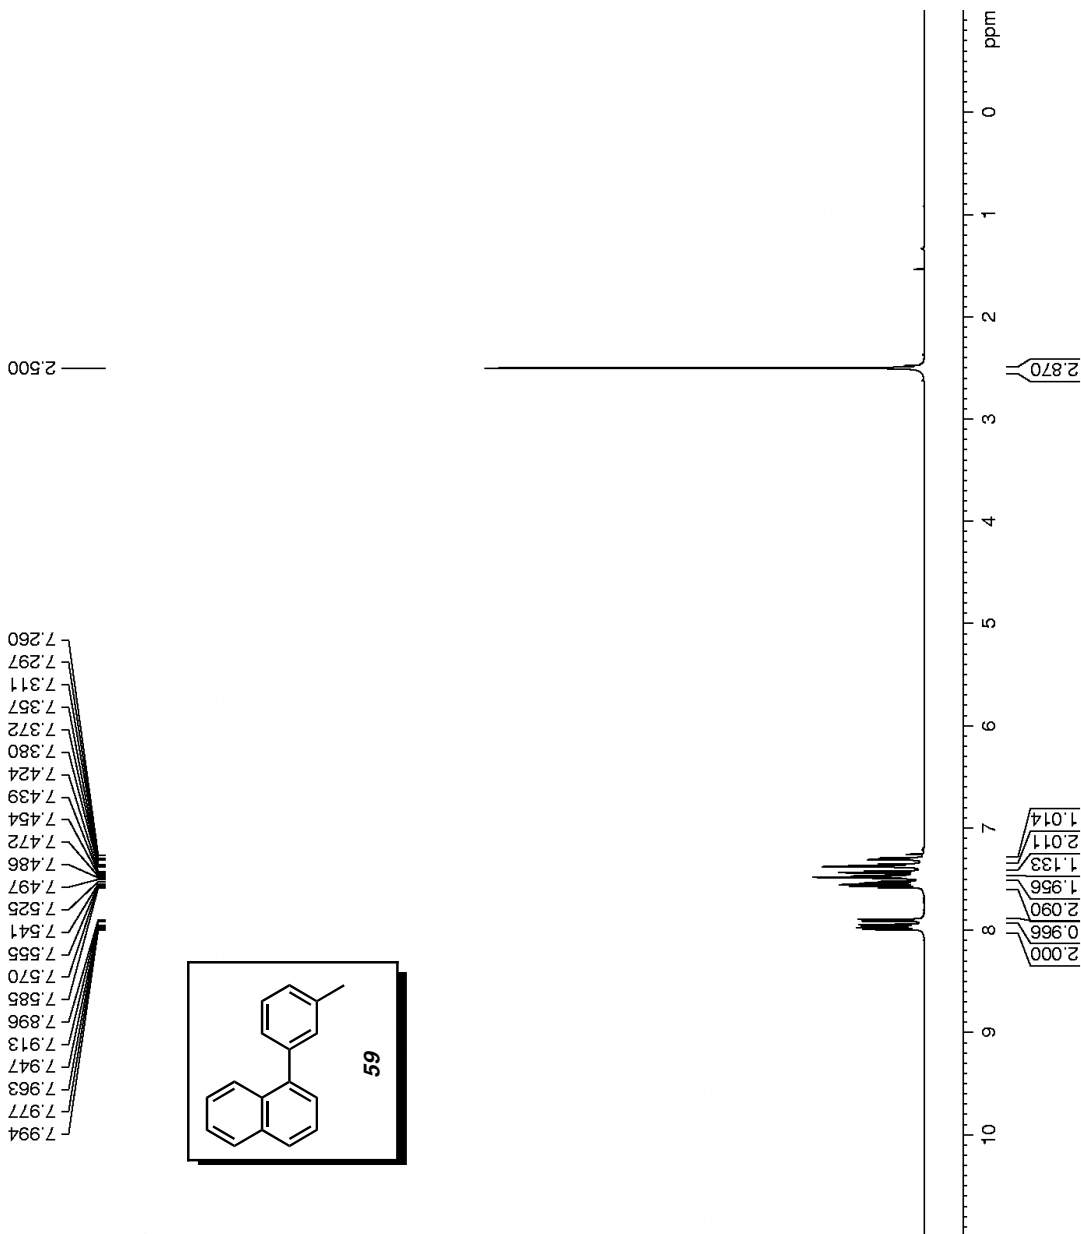

Current Data Parameters  
 NAME AS-1-79  
 EXPNO 1  
 PROCNO 1

F2 - Acquisition Parameters  
 Date\_ 20100406  
 Time\_ 5:05  
 INSTRUM avance500  
 PROBHD 5 mm bb-Z800  
 PULPROG zg30  
 TD 65536  
 SOLVENT CDCI3  
 NS 16  
 DS 0  
 SWH 10000.000 Hz  
 FIDRES 0.152588 Hz  
 AQ 3.2769001 sec  
 RG 128  
 DW 50.000 usec  
 DE 6.00 usec  
 TE 301.2 K  
 D1 2.00000000 sec  
 MCREST 0.00000000 sec  
 MCWRK 0.01500000 sec

==== CHANNEL f1 =====  
 NUC1 1H  
 P1 12.00 usec  
 PL1 0.00 dB  
 SFO1 500.3330020 MHz

F2 - Processing parameters  
 SI 32768  
 SF 500.3300220 MHz  
 WDW EM  
 SSB 0  
 LB 0.30 Hz  
 GB 0  
 PC 1.00

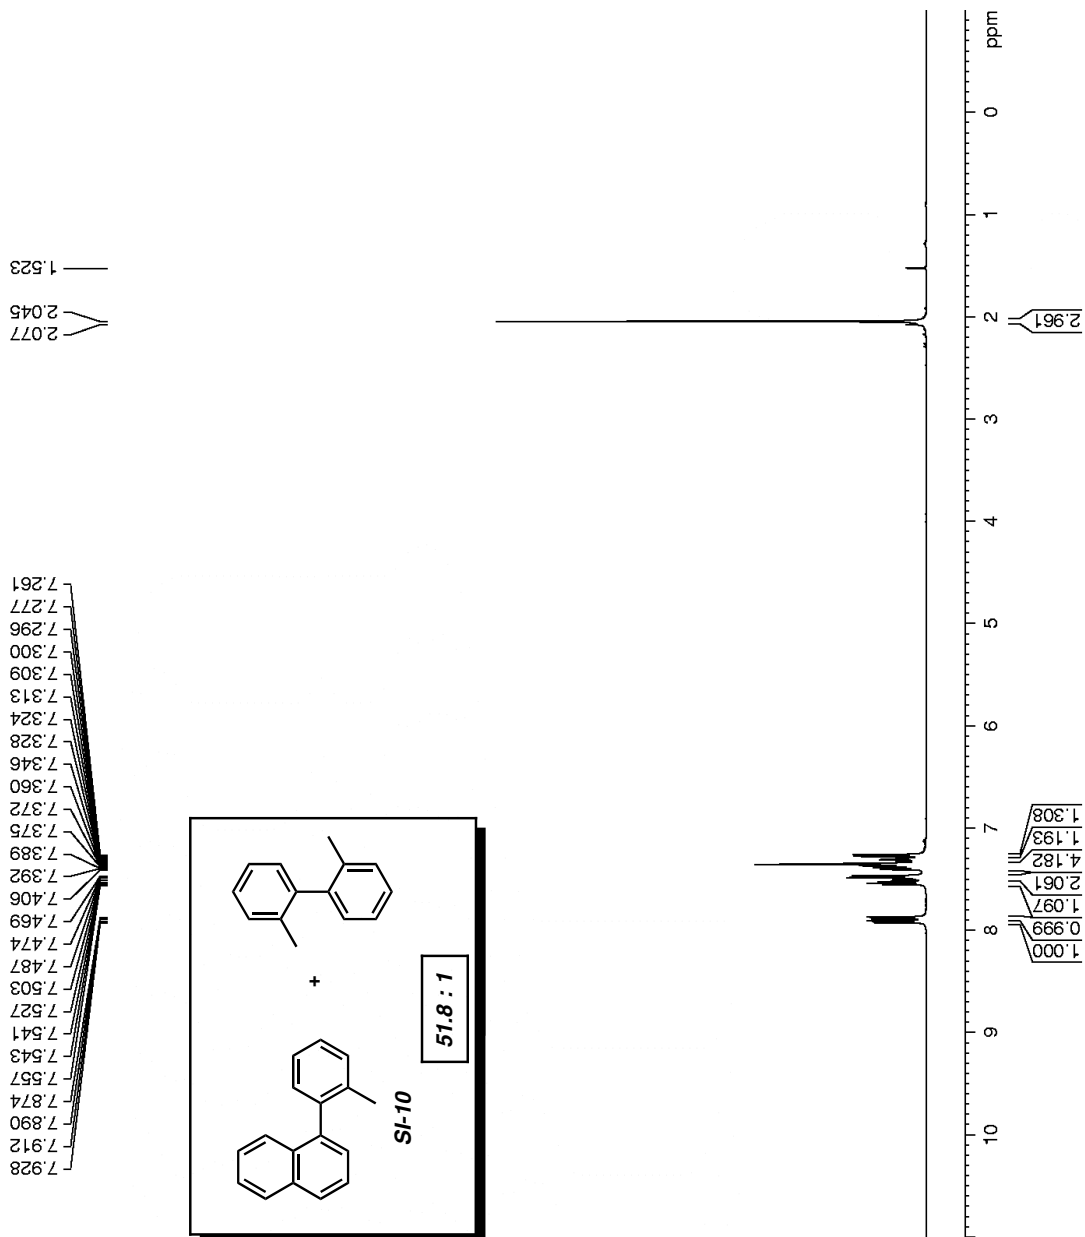

Current Data Parameters  
 NAME AS-1-97B  
 EXPNO 1  
 PROCNO 1

F2 - Acquisition Parameters  
 Date\_ 20100421  
 Time\_ 20.22  
 INSTRUM avance500  
 PROBHD 5 mm bb-Z Z800  
 PULPROG zg30  
 TD 65536  
 SOLVENT C6D6  
 NS 8  
 DS 0  
 SWH 10000.000 Hz  
 FIDRES 0.152588 Hz  
 AQ 3.2769001 sec  
 RG 80.6  
 DW 50.000 usec  
 DE 6.00 usec  
 TE 298.2 K  
 D1 2.00000000 sec  
 MCREST 0.00000000 sec  
 MCWRK 0.01500000 sec

==== CHANNEL f1 =====  
 NUC1 1H  
 P1 12.25 usec  
 PL1 0.00 dB  
 SFO1 500.3330020 MHz

F2 - Processing parameters  
 SI 32768  
 SF 500.3300110 MHz  
 WDW EM  
 SSB 0  
 LB 0.30 Hz  
 GB 0  
 PC 1.00

ault proton paramet

8.026  
8.009  
7.712  
7.695  
7.660  
7.644  
7.390  
7.374  
7.343  
7.336  
7.332  
7.330  
7.320  
7.306  
7.290  
7.274  
7.272  
7.258  
7.256  
7.241  
7.233  
7.230  
7.216  
7.214  
7.202  
7.200  
7.160  
4.309  
3.185

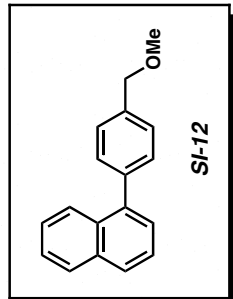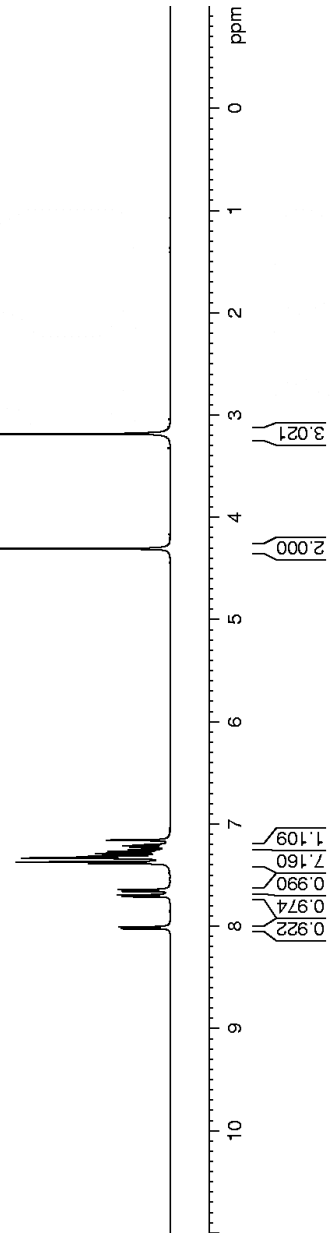

Current Data Parameters  
 NAME AS-1-78  
 EXPNO 390  
 PROCNO 1

F2 - Acquisition Parameters  
 Date\_ 20100402  
 Time\_ 22.03  
 INSTRUM airx400  
 PROBHD 5 mm QNP 1H  
 PULPROG zg30  
 TD 65536  
 SOLVENT CDCl3  
 NS 32  
 DS 0  
 SWH 8064.516 Hz  
 FIDRES 0.123055 Hz  
 AQ 4.0632820 sec  
 RG 256  
 DW 62.000 usec  
 DE 88.57 usec  
 TE 300.0 K  
 D1 2.00000000 sec  
 P1 7.50 usec  
 SFO1 400.1324008 MHz  
 NUCLEUS 1H

F2 - Processing parameters  
 SI 65536  
 SF 400.1300179 MHz  
 WDW EM  
 SSB 0  
 LB 0.30 Hz  
 GB 0  
 PC 1.00

Account no. nkg338  
 AS-1-78

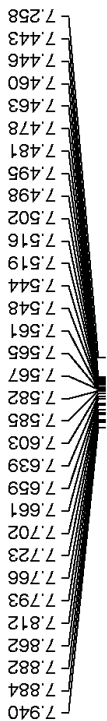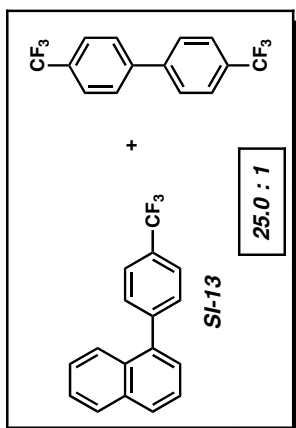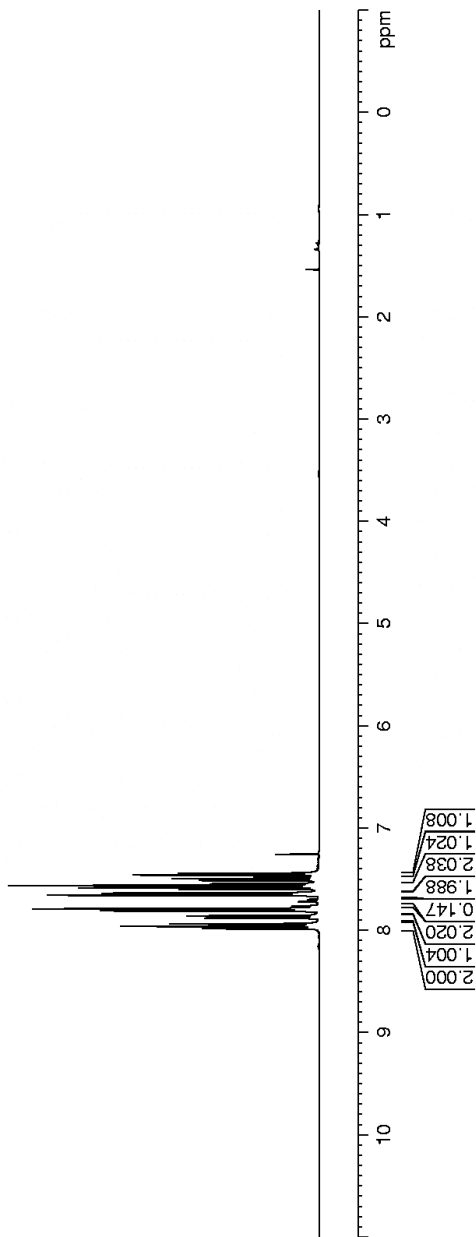

Current Data Parameters  
 NAME AS-1-129A  
 EXPNO 3  
 PROCNO 1

F2 - Acquisition Parameters  
 Date\_ 20100606  
 Time\_ 14.49  
 INSTRUM avance500  
 PROBHD 5 mm bb-Z Z800  
 PULPROG zg30  
 TD 65536  
 SOLVENT CDCI3  
 NS 8  
 DS 0  
 SWH 10000.000 Hz  
 FIDRES 0.152588 Hz  
 AQ 3.2769001 sec  
 RG 181  
 DW 50.000 usec  
 DE 6.00 usec  
 TE 298.3 K  
 D1 2.00000000 sec  
 MCREST 0.00000000 sec  
 MCWRK 0.01500000 sec

===== CHANNEL f1 =====  
 NUC1 1H  
 P1 12.25 usec  
 PL1 0.00 dB  
 SFO1 500.3330020 MHz

F2 - Processing parameters  
 SI 32768  
 SF 500.3300222 MHz  
 WDW EM  
 SSB 0  
 LB 0.30 Hz  
 GB 0  
 PC 1.00

7.923  
7.907  
7.879  
7.862  
7.855  
7.838  
7.838  
7.538  
7.523  
7.521  
7.507  
7.490  
7.488  
7.472  
7.461  
7.455  
7.444  
7.431  
7.429  
7.407  
7.406  
7.393  
7.392  
7.205  
7.187  
7.170

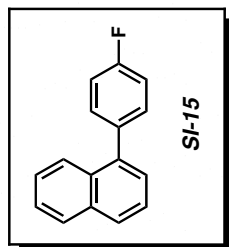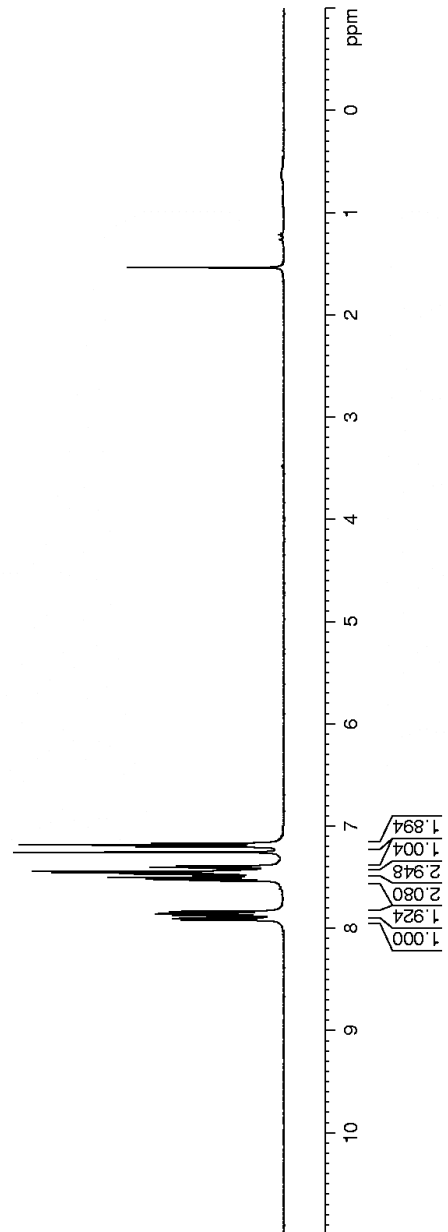

1.536



Current Data Parameters  
 NAME AS-1-127  
 EXPNO 1  
 PROCNO 1

F2 - Acquisition Parameters  
 Date\_ 20100512  
 Time\_ 19.46  
 INSTRUM avance500  
 PROBHD 5 mm bb-Z Z800  
 PULPROG zg30  
 TD 65536  
 SOLVENT CDCI3  
 NS 16  
 DS 0  
 SWH 10000.000 Hz  
 FIDRES 0.152588 Hz  
 AQ 3.2769001 sec  
 RG 90.5  
 DW 50.000 usec  
 DE 6.00 usec  
 TE 297.8 K  
 D1 2.00000000 sec  
 MCREST 0.00000000 sec  
 MCWRK 0.01500000 sec

===== CHANNEL f1 =====  
 NUC1 1H  
 P1 12.25 usec  
 PL1 0.00 dB  
 SFO1 500.3330020 MHz

F2 - Processing parameters  
 SI 32768  
 SF 500.3300220 MHz  
 WDW EM  
 SSB 0  
 LB 0.30 Hz  
 GB 0  
 PC 1.00

ault proton paramet

8.107  
8.091  
7.941  
7.925  
7.915  
7.899  
7.865  
7.848  
7.622  
7.605  
7.565  
7.550  
7.549  
7.538  
7.534  
7.525  
7.523  
7.509  
7.507  
7.475  
7.473  
7.462  
7.459  
7.456  
7.443  
7.442  
7.429  
7.428  
7.260  
2.693

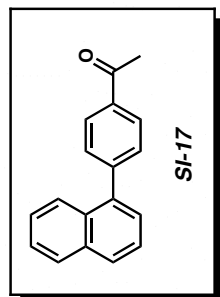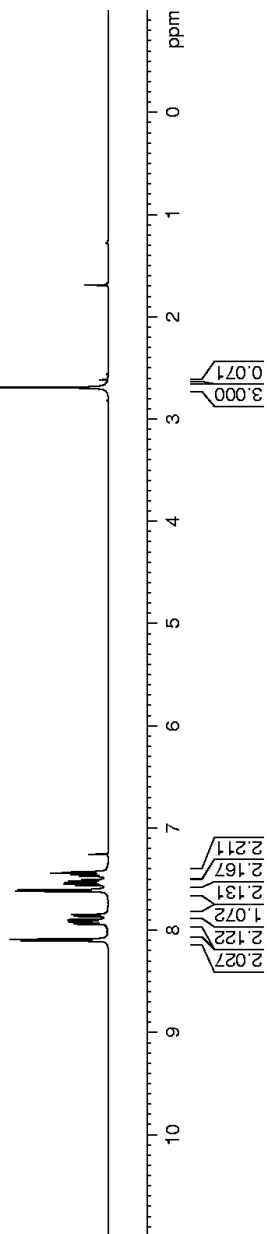

Current Data Parameters  
 NAME SDR1-164  
 EXPNO 1  
 PROCNO 1

F2 - Acquisition Parameters  
 Date\_ 20100412  
 Time\_ 17.09  
 INSTRUM avance500  
 PROBHD 5 mm bb-Z Z800  
 PULPROG zg30  
 TD 65536  
 SOLVENT CDCI3  
 NS 8  
 DS 0  
 SWH 10000.000 Hz  
 FIDRES 0.152588 Hz  
 AQ 3.2769001 sec  
 RG 71.8  
 DW 50.000 usec  
 DE 6.00 usec  
 TE 298.2 K  
 D1 2.00000000 sec  
 MCREST 0.00000000 sec  
 MCWRK 0.01500000 sec

===== CHANNEL f1 =====  
 NUC1 1H  
 P1 12.00 usec  
 PL1 0.00 dB  
 SFO1 500.3330020 MHz

F2 - Processing parameters  
 SI 32768  
 SF 500.3300216 MHz  
 WDW EM  
 SSB 0  
 LB 0.30 Hz  
 GB 0  
 PC 1.00

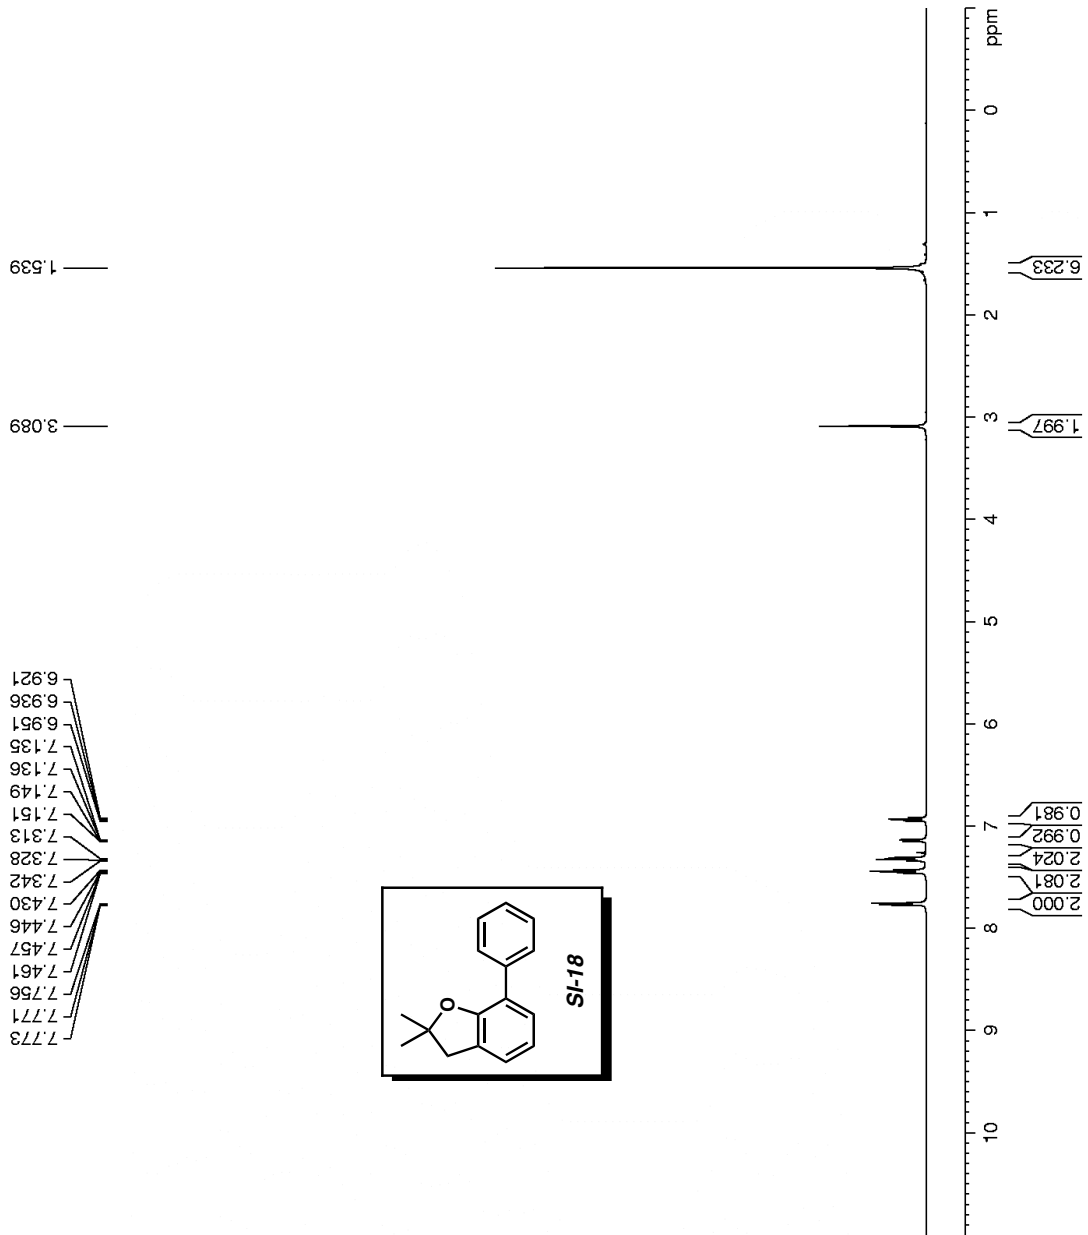

Current Data Parameters  
 NAME KVP-I-186  
 EXPNO 1  
 PROCNO 1

F2 - Acquisition Parameters  
 Date 20090309  
 Time 9.47  
 INSTRUM avance500  
 PROBHD 5 mm bb-Z800  
 PULPROG zg30  
 TD 65536  
 SOLVENT CDCI3  
 NS 16  
 DS 0  
 SWH 10000.000 Hz  
 FIDRES 0.152588 Hz  
 AQ 3.2769001 sec  
 RG 256  
 DW 50.000 usec  
 DE 6.00 usec  
 TE 292.6 K  
 D1 2.00000000 sec  
 MCREST 0.00000000 sec  
 MCWRK 0.01500000 sec

==== CHANNEL f1 =====  
 NUC1 1H  
 P1 12.00 usec  
 PL1 0.00 dB  
 SFO1 500.3330020 MHz

F2 - Processing parameters  
 SI 32768  
 SF 500.3300234 MHz  
 WDW EM  
 SSB 0  
 LB 0.30 Hz  
 GB 0  
 PC 1.00

7.847  
7.845  
7.667  
7.664  
7.650  
7.648  
7.498  
7.495  
7.481  
7.478  
7.455  
7.452  
7.440  
7.428  
7.424  
7.399  
7.382  
7.367  
7.326  
7.324  
7.321  
7.312  
7.309  
7.306  
7.297  
7.294  
7.292  
7.091  
7.085  
6.544  
6.543  
6.538  
6.537  
3.838

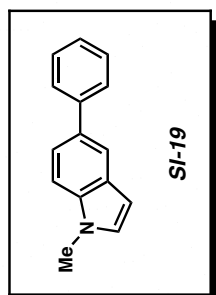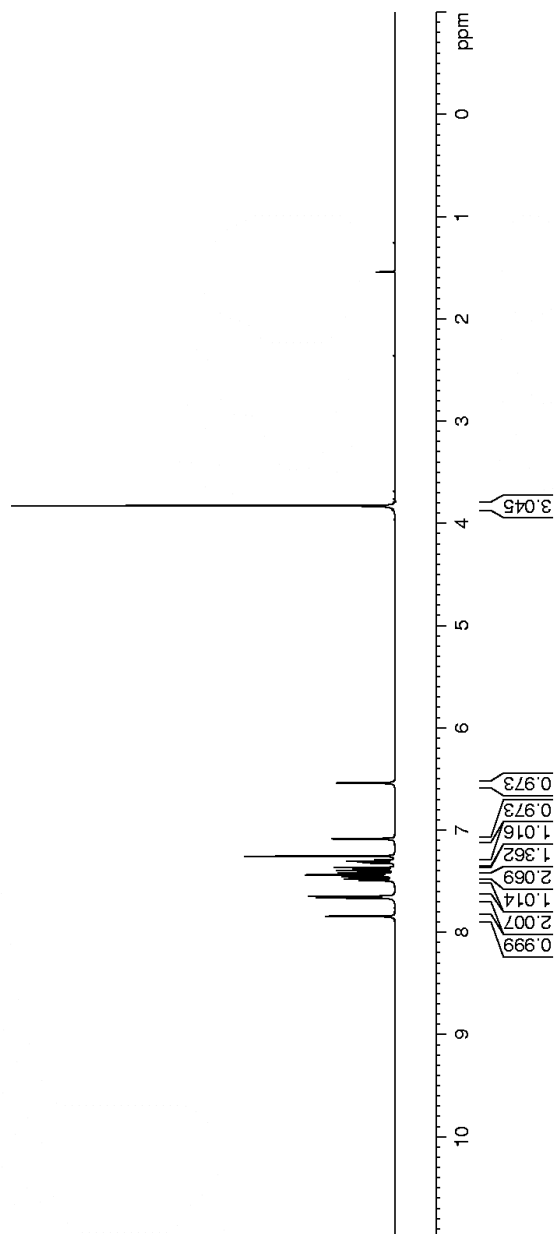

Current Data Parameters  
 NAME AK1-75  
 EXPNO 380  
 PROCNO 1

F2 - Acquisition Parameters  
 Date\_ 20100428  
 Time\_ 15:57  
 INSTRUM airx400  
 PROBHD 5 mm QNP 1H  
 PULPROG zg30  
 TD 65536  
 SOLVENT CDCI3  
 NS 8  
 DS 0  
 SWH 8064.516 Hz  
 FIDRES 0.123055 Hz  
 AQ 4.0632820 sec  
 RG 2048  
 DW 62.000 usec  
 DE 88.57 usec  
 TE 300.0 K  
 D1 2.00000000 sec  
 P1 7.50 usec  
 SFO1 400.1324008 MHz  
 NUCLEUS 1H

F2 - Processing parameters  
 SI 65536  
 SF 400.1300173 MHz  
 WDW EM  
 SSB 0  
 LB 0.30 Hz  
 GB 0  
 PC 1.00

Account no. nkg339  
 AK1-75

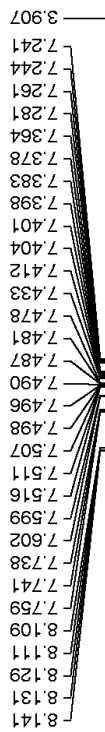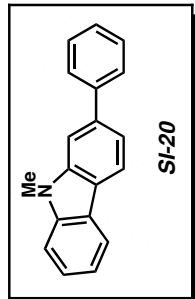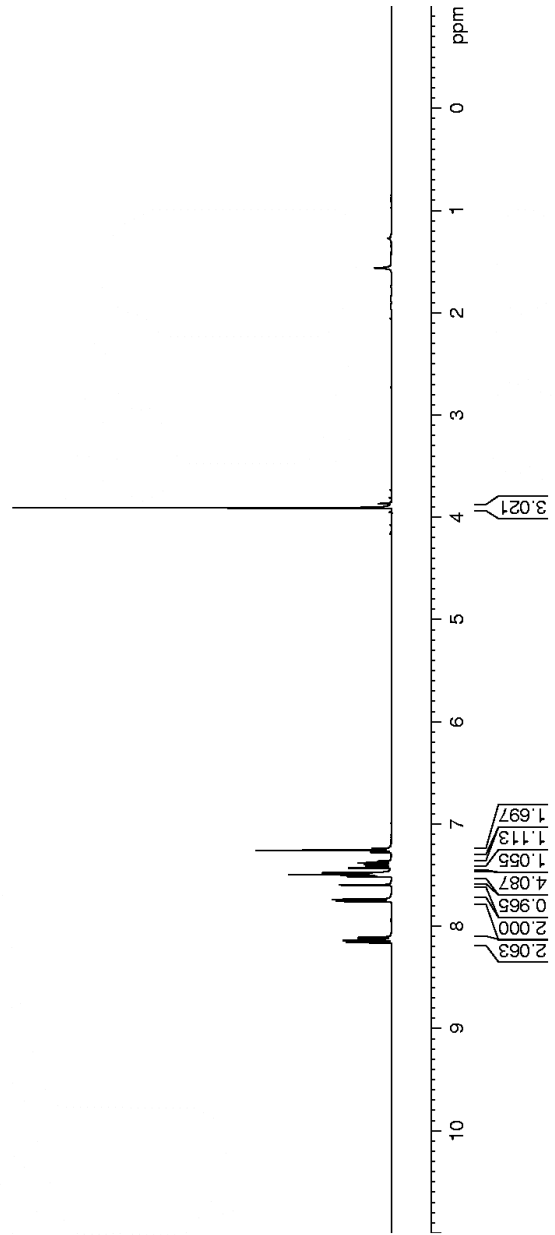

Current Data Parameters  
 NAME AK1-078  
 EXPNO 10  
 PROCNO 1

F2 – Acquisition Parameters  
 Date\_ 20100929  
 Time\_ 13.07  
 INSTRUM avance500  
 PROBHD 5 mm bb-Z800  
 PULPROG zg30  
 TD 65536  
 SOLVENT CDCI3  
 NS 8  
 DS 0  
 SWH 10000.000 Hz  
 FIDRES 0.152588 Hz  
 AQ 3.2769001 sec  
 RG 181  
 DW 50.000 usec  
 DE 6.00 usec  
 TE 296.3 K  
 D1 2.00000000 sec  
 MCREST 0.00000000 sec  
 MCWRK 0.01500000 sec

===== CHANNEL f1 =====  
 NUC1 1H  
 P1 12.25 usec  
 PL1 0.00 dB  
 SFO1 500.3330020 MHz

F2 – Processing parameters  
 SI 32768  
 SF 500.33300220 MHz  
 WDW EM  
 SSB 0  
 LB 0.30 Hz  
 GB 0  
 PC 1.00

7.221  
7.224  
7.230  
7.234  
7.237  
7.244  
7.247  
7.404  
7.415  
7.419  
7.433  
7.466  
7.482  
7.494  
7.497  
7.724  
7.754  
7.757  
7.985  
8.000  
8.696  
8.705

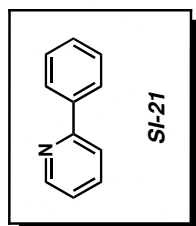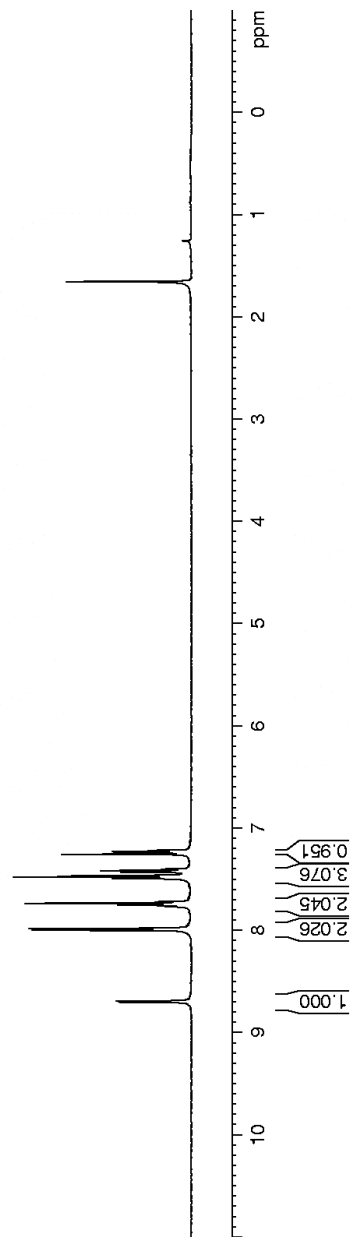

Current Data Parameters  
 NAME AK1-77  
 EXPNO 550  
 PROCNO 1

F2 - Acquisition Parameters  
 Date\_ 20100428  
 Time\_ 20.26  
 INSTRUM aix400  
 PROBHD 5 mm QNP 1H  
 PULPROG zg30  
 TD 65536  
 SOLVENT CDC13  
 NS 8  
 DS 0  
 SWH 8064.516 Hz  
 FIDRES 0.123055 Hz  
 AQ 4.0632820 sec  
 RG 360  
 DW 62.000 usec  
 DE 88.57 usec  
 TE 300.0 K  
 D1 2.0000000 sec  
 P1 7.50 usec  
 SFO1 400.1324008 MHz  
 NUCLEUS 1H

F2 - Processing parameters  
 SI 65536  
 SF 400.1300173 MHz  
 WDW EM  
 SSB 0  
 LB 0.30 Hz  
 GB 0  
 PC 1.00

Account no. nkg339  
 AK1-77

8.180  
8.174  
8.172  
7.996  
7.990  
7.988  
7.983  
7.973  
7.968  
7.726  
7.722  
7.717  
7.707  
7.704  
7.703  
7.702  
7.697  
7.516  
7.514  
7.510  
7.496  
7.493  
7.481  
7.477  
7.421  
7.418  
7.411  
7.408  
7.401  
7.390  
7.384  
7.381  
7.261

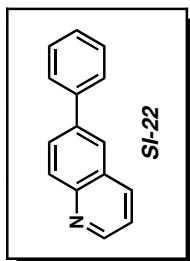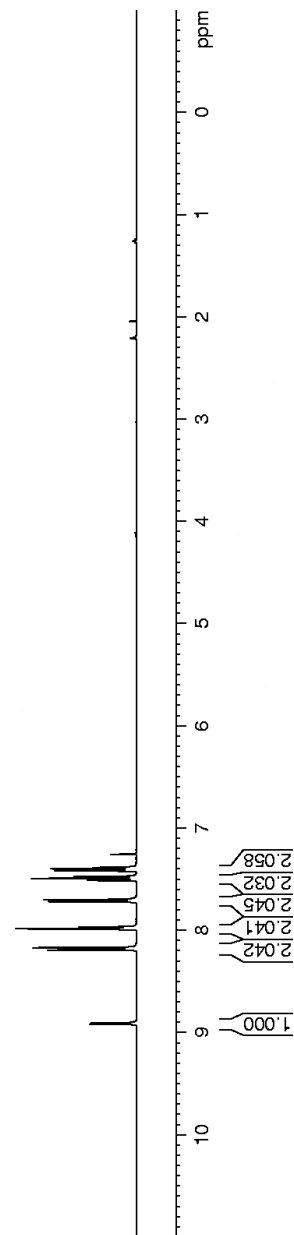

Current Data Parameters  
 NAME AK1-79  
 EXPNO 500  
 PROCNO 1

F2 - Acquisition Parameters  
 Date\_ 20100429  
 Time\_ 19:49  
 INSTRUM aix400  
 PROBHD 5 mm QNP 1H  
 PULPROG zg30  
 TD 65536  
 SOLVENT CDC13  
 NS 8  
 DS 0  
 SWH 8064.516 Hz  
 FIDRES 0.123055 Hz  
 AQ 4.0632820 sec  
 RG 180  
 DW 62.000 usec  
 DE 88.57 usec  
 TE 300.0 K  
 D1 2.00000000 sec  
 P1 7.50 usec  
 SFO1 400.1324008 MHz  
 NUCLEUS 1H

F2 - Processing parameters  
 SI 65536  
 SF 400.1300173 MHz  
 WDW EM  
 SSB 0  
 LB 0.30 Hz  
 GB 0  
 PC 1.00

Account no. NKG339  
 AK1-79

7.901  
7.900  
7.897  
7.893  
7.879  
7.878  
7.814  
7.806  
7.803  
7.794  
7.788  
7.601  
7.585  
7.582  
7.568  
7.564  
7.548  
7.502  
7.500  
7.499  
7.497  
7.486  
7.481  
7.476  
7.465  
7.462  
7.463  
7.332  
7.311  
7.261  
7.260

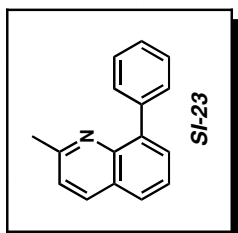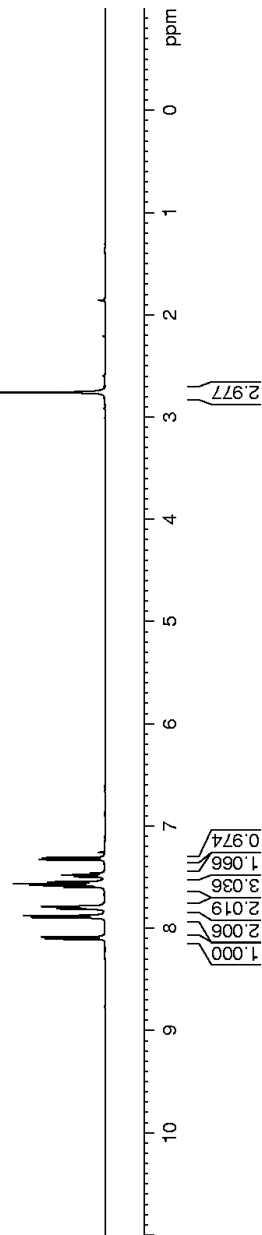

Current Data Parameters  
 NAME AK1-42  
 EXPNO 350  
 PROCNO 1

F2 - Acquisition Parameters  
 Date\_ 20100407  
 Time\_ 17.16  
 INSTRUM aix400  
 PROBHD 5 mm QNP 1H  
 PULPROG zg30  
 TD 65536  
 SOLVENT CDCI3  
 NS 8  
 DS 0  
 SWH 8064.516 Hz  
 FIDRES 0.123055 Hz  
 AQ 4.0632820 sec  
 RG 1024  
 DW 62.000 usec  
 DE 88.57 usec  
 TE 300.0 K  
 D1 2.0000000 sec  
 P1 7.50 usec  
 SFO1 400.1324008 MHz  
 NUCLEUS 1H

F2 - Processing parameters  
 SI 65536  
 SF 400.1300173 MHz  
 WDW EM  
 SSB 0  
 LB 0.30 Hz  
 GB 0  
 PC 1.00

Account no. nkg339  
 AK1-42

7.832  
7.812  
7.670  
7.669  
7.667  
7.665  
7.651  
7.648  
7.619  
7.616  
7.603  
7.595  
7.583  
7.578  
7.571  
7.568  
7.550  
7.533  
7.530  
7.352  
7.348  
7.334  
7.330  
7.315  
7.310  
7.307  
7.304  
7.289  
7.285  
7.270  
7.267  
7.260  
7.174  
6.996  
6.922  
6.902  
4.070

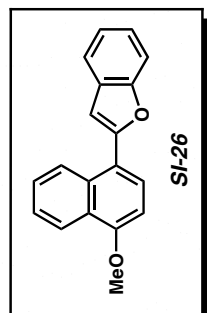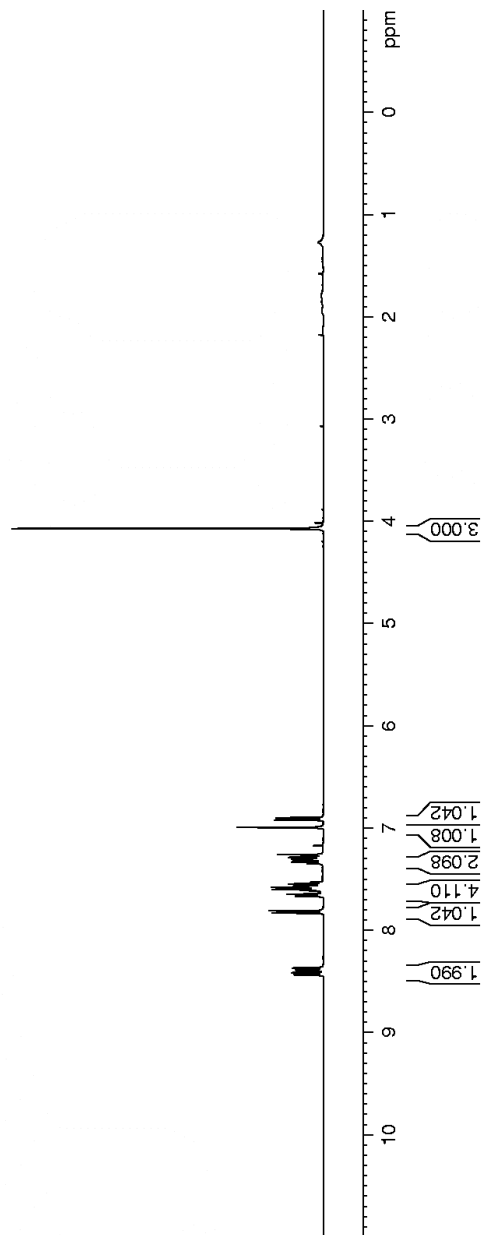



Current Data Parameters  
 NAME AK1-25  
 EXPNO 90  
 PROCNO 1

F2 - Acquisition Parameters  
 Date\_ 20100330  
 Time\_ 11:30  
 INSTRUM aix400  
 PROBHD 5 mm QNP 1H  
 PULPROG zg30  
 TD 65536  
 SOLVENT CDCI3  
 NS 8  
 DS 0  
 SWH 8064.516 Hz  
 FIDRES 0.123055 Hz  
 AQ 4.0632820 sec  
 RG 512  
 DW 62.000 usec  
 DE 88.57 usec  
 TE 300.0 K  
 D1 2.0000000 sec  
 P1 7.50 usec  
 SFO1 400.1324008 MHz  
 NUCLEUS 1H

F2 - Processing parameters  
 SI 65536  
 SF 400.1300198 MHz  
 WDW EM  
 SSB 0  
 LB 0.30 Hz  
 GB 0  
 PC 1.00

Account no. nkg339  
 AK1-25

8.148  
8.140  
7.927  
7.918  
7.912  
7.905  
7.898  
7.895  
7.888  
7.867  
7.857  
7.850  
7.840  
7.834  
7.824  
7.685  
7.683  
7.681  
7.602  
7.598  
7.593  
7.543  
7.538  
7.526  
7.521  
7.512  
7.503  
7.494  
7.487  
7.477  
7.253  
6.730  
6.728  
6.726  
6.724

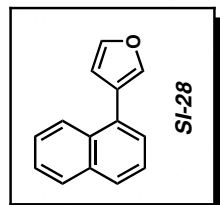

1.540

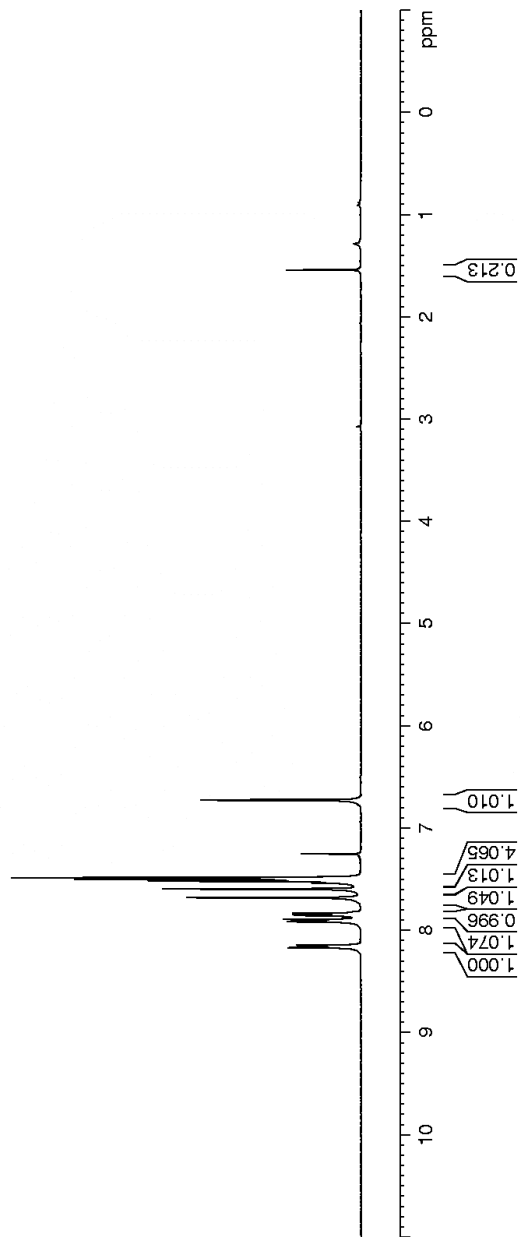

Current Data Parameters  
 NAME AK1-29  
 EXPNO 240  
 PROCNO 1

F2 - Acquisition Parameters  
 Date\_ 20100402  
 Time\_ 17.51  
 INSTRUM aix400  
 PROBH 5 mm QNP 1H  
 PULPROG zg30  
 TD 65536  
 SOLVENT CDC13  
 NS 8  
 DS 0  
 SWH 8064.516 Hz  
 FIDRES 0.123055 Hz  
 AQ 4.0632820 sec  
 RG 2048  
 DW 62.000 usec  
 DE 88.57 usec  
 TE 300.0 K  
 D1 2.00000000 sec  
 P1 7.50 usec  
 SFO1 400.1324008 MHz  
 NUCLEUS 1H

F2 - Processing parameters  
 SI 65536  
 SF 400.1300169 MHz  
 WDW EM  
 SSB 0  
 LB 0.30 Hz  
 GB 0  
 PC 1.00

Account no. nkg339  
 AK1-29

8.330  
8.326  
8.327  
8.326  
7.992  
7.989  
7.984  
7.974  
7.969  
7.968  
7.507  
7.502  
7.499  
7.490  
7.482  
7.479  
7.474  
7.453  
7.445  
7.440  
7.433  
7.412  
7.393  
7.344  
7.341  
7.336  
7.333  
7.290  
7.287  
7.278  
7.275  
7.262  
6.867  
6.847  
4.046

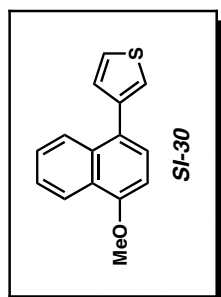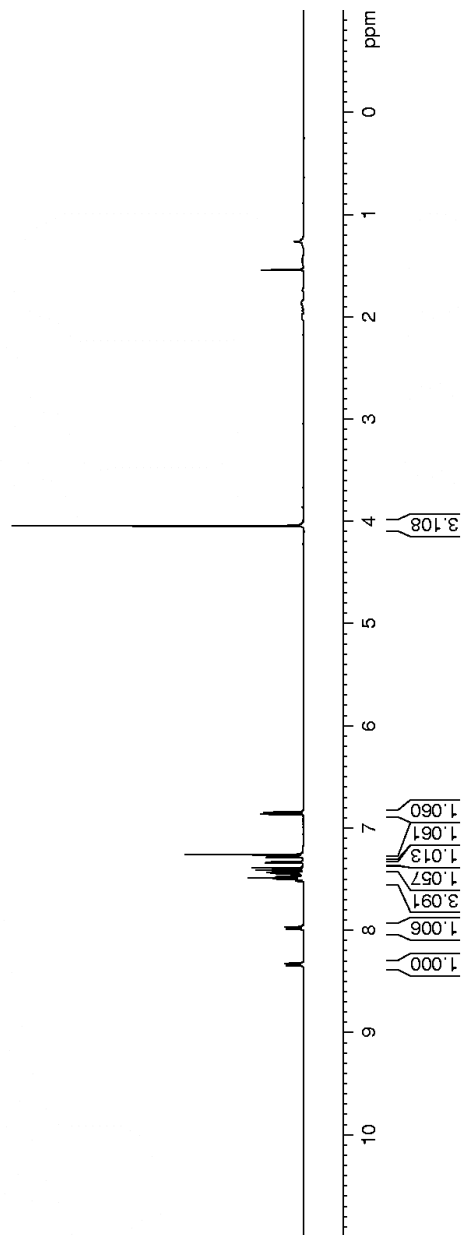

Current Data Parameters  
 NAME AK1-43  
 EXPNO 10  
 PROCNO 1

F2 - Acquisition Parameters  
 Date\_ 20100508  
 Time\_ 18:41  
 INSTRUM avance500  
 PROBH 5 mm bb-Z800  
 PULPROG zg30  
 TD 65536  
 SOLVENT CDCI3  
 NS 8  
 DS 0  
 SWH 10000.000 Hz  
 FIDRES 0.152588 Hz  
 AQ 3.2769001 sec  
 RG 64  
 DW 50.000 usec  
 DE 6.00 usec  
 TE 298.5 K  
 D1 2.00000000 sec  
 MCREST 0.00000000 sec  
 MCWRK 0.01500000 sec

===== CHANNEL f1 =====  
 NUC1 1H  
 P1 12.00 usec  
 PL1 0.00 dB  
 SFO1 500.3330020 MHz

F2 - Processing parameters  
 SI 32768  
 SF 500.3330220 MHz  
 WDW EM  
 SSB 0  
 LB 0.00 Hz  
 GB 0  
 PC 1.00

8.324  
8.318  
8.314  
8.314  
7.931  
7.916  
7.901  
7.617  
7.613  
7.603  
7.598  
7.591  
7.574  
7.571  
7.556  
7.540  
7.524  
7.522  
7.510  
7.508  
7.494  
7.452  
7.450  
7.438  
7.436  
7.433  
7.419  
7.258  
7.059  
7.049  
7.045  
7.035  
3.900

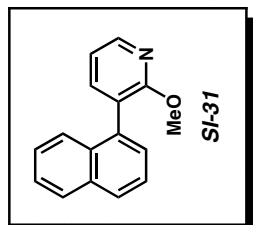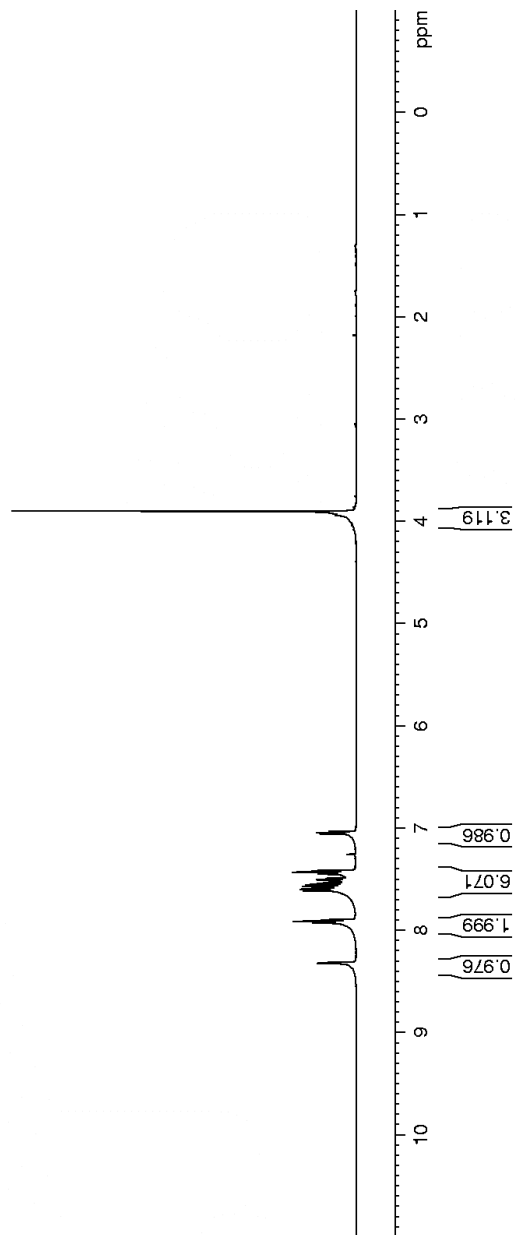

Current Data Parameters  
 NAME AK1-93  
 EXPNO 10  
 PROCNO 1

F2 - Acquisition Parameters  
 Date\_ 20100508  
 Time\_ 19:48  
 INSTRUM avance500  
 PROBHD 5 mm bb-Z800  
 PULPROG zg30  
 TD 65536  
 SOLVENT CDCI3  
 NS 8  
 DS 0  
 SWH 10000.000 Hz  
 FIDRES 0.152588 Hz  
 AQ 3.2769001 sec  
 RG 64  
 DW 50.000 usec  
 DE 6.00 usec  
 TE 298.7 K  
 D1 2.00000000 sec  
 MCREST 0.00000000 sec  
 MCWRK 0.01500000 sec

===== CHANNEL f1 =====  
 NUC1 1H  
 P1 12.00 usec  
 PL1 0.00 dB  
 SFO1 500.3330020 MHz

F2 - Processing parameters  
 SI 32768  
 SF 500.33300220 MHz  
 WDW EM  
 SSB 0  
 LB 0.30 Hz  
 GB 0  
 PC 1.00

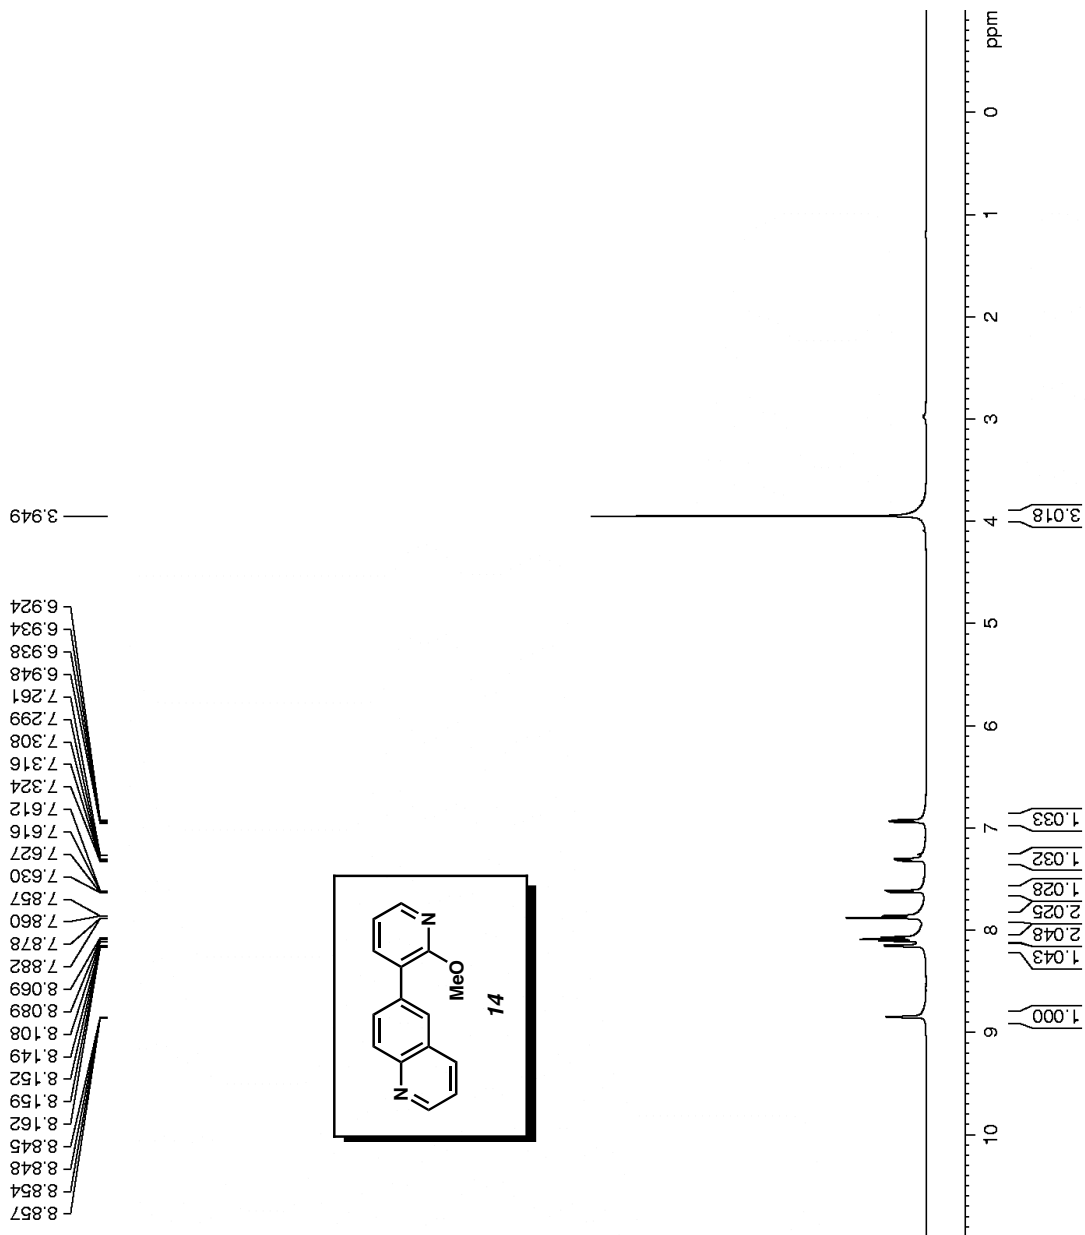

Supplement: NIHMS285969-supplement-1_si_001.pdf [file NIHMS285969-supplement-1_si_001.pdf]
