# Supplementary material
Source: PubMed Central journal article supplement (PMC3091075)
Supplement: NIHMS285969-supplement-2_si_002.pdf [file NIHMS285969-supplement-2_si_002.pdf]

# Supporting Information

## Suzuki–Miyaura Cross-Coupling of Aryl Carbamates and Sulfamates: Experimental and Computational Studies

Kyle W. Quasdorf<sup>†</sup>, Aurora Antoft-Finch<sup>‡</sup>, Peng Liu<sup>†</sup>, Anna Komaromi<sup>†</sup>,  
Amanda L. Silberstein<sup>†</sup>, Tom Blackburn<sup>‡</sup>, Stephen D. Ramgren<sup>†</sup>,  
K. N. Houk<sup>†\*</sup>, Victor Snieckus<sup>‡\*</sup>, and Neil K. Garg<sup>†\*</sup>

<sup>†</sup>Department of Chemistry and Biochemistry, University of California, Los Angeles, California,  
90095

<sup>‡</sup>Department of Chemistry, Queen's University, Kingston, Ontario K7L 3N6, Canada

\* houk@chem.ucla.edu; snieckus@chem.queensu.ca; neilgarg@chem.ucla.edu

### Table of Contents

|                                                                                                                                          |     |
|------------------------------------------------------------------------------------------------------------------------------------------|-----|
| Complete Reference of Gaussian 03.....                                                                                                   | S2  |
| Bond Dissociation Enthalpies (BDEs) of C–O Bonds.....                                                                                    | S3  |
| Comparison of Mono- and Bis-ligated Oxidative Addition Transition States.....                                                            | S4  |
| Possible Isomers of the Transmetallation Transition States .....                                                                         | S6  |
| Single Point Calculations using Larger Basis Sets and Other Density Functionals.....                                                     | S7  |
| Details of Conformational Searches of the PCy <sub>3</sub> ligand .....                                                                  | S9  |
| The Cartesian coordinates (Å), total SCF energies, enthalpies at 298K, and Gibbs free energies at 298K for the optimized structures..... | S10 |

### Complete Reference of Gaussian 03

Gaussian 03, Revision D.01: Frisch, M. J.; Trucks, G. W.; Schlegel, H. B.; Scuseria, G. E.; Robb, M. A.; Cheeseman, J. R.; Montgomery Jr., J. A.; Vreven, T.; Kudin, K. N.; Burant, J. C.; Millam, J. M.; Iyengar, S. S.; Tomasi, J.; Barone, V.; Mennucci, B.; Cossi, M.; Scalmani, G.; Rega, N.; Petersson, G. A.; Nakatsuji, H.; Hada, M.; Ehara, M.; Toyota, K.; Fukuda, R.; Hasegawa, J.; Ishida, M.; Nakajima, T.; Honda, Y.; Kitao, O.; Nakai, H.; Klene, M.; Li, X.; Knox, J. E.; Hratchian, H. P.; Cross, J. B.; Bakken, V.; Adamo, C.; Jaramillo, J.; Gomperts, R.; Stratmann, R. E.; Yazyev, O.; Austin, A. J.; Cammi, R.; Pomelli, C.; Ochterski, J. W.; Ayala, P. Y.; Morokuma, K.; Voth, G. A.; Salvador, P.; Dannenberg, J. J.; Zakrzewski, V. G.; Dapprich, S.; Daniels, A. D.; Strain, M. C.; Farkas, O.; Malick, D. K.; Rabuck, A. D.; Raghavachari, K.; Foresman, J. B.; Ortiz, J. V.; Cui, Q.; Baboul, A. G.; Clifford, S.; Cioslowski, J.; Stefanov, B. B.; Liu, G.; Liashenko, A.; Piskorz, P.; Komaromi, I.; Martin, R. L.; Fox, D. J.; Keith, T.; Al-Laham, M. A.; Peng, C. Y.; Nanayakkara, A.; Challacombe, M.; Gill, P. M. W.; Johnson, B.; Chen, W.; Wong, M. W.; Gonzalez, C.; Pople, J. A., Gaussian, Inc., Wallingford CT, **2004**.

## Bond Dissociation Enthalpies (BDEs) of C–O Bonds

Gas phase BDEs of various Ar–O bonds are calculated using B3LYP/6-31G(d). The results are shown below. The ArO–carbonyl bond is much weaker than the Ar–O bond in *N,N*-dimethyl phenyl *O*-carbamate.

### Aryl–O bonds

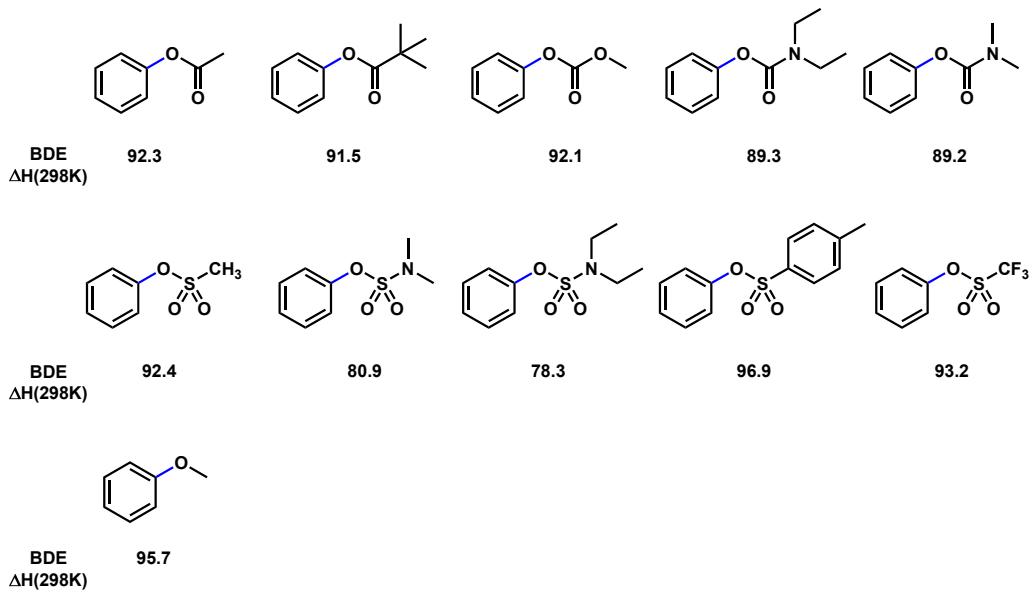

### ArO–carbonyl bonds

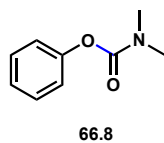

B3LYP/6-31G(d), gas phase calculations

## Comparison of Mono- and Bis-ligated Oxidative Addition Transition States

These calculations are performed using  $\text{PH}_3$  as model ligand. Energies reported are Gibbs free energies with respect to  $\text{Ni}(\text{PH}_3)_2$  at the B3LYP/LANL2DZ-6-31G(d) level. Geometries are optimized in gas phase. Single point CPCM solvation energy corrections are included.

The calculations suggest that the mono-ligated pathway is strongly favored for oxidative additions with both carbamates and sulfamates. It is postulated that bulkier ligands, such as  $\text{PCy}_3$ , may further increase the preference of mono-ligated pathway due to steric effects.

Oxidative addition transition states of the couplings with *N,N*-dimethyl phenyl *O*-carbamate.

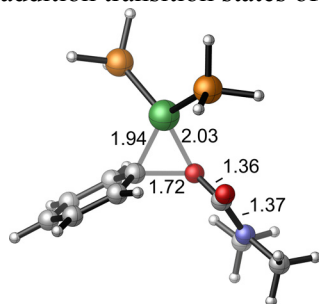

**TS-S1**

bis-ligated 3-centered TS

$$\Delta G_{(\text{sol})}^\ddagger = 28.8 \text{ kcal/mol}$$

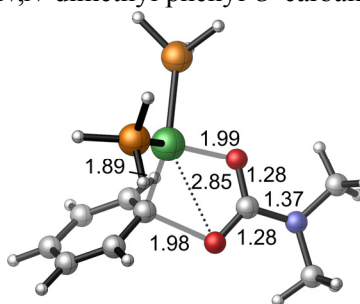

**TS-S2**

bis-ligated 5-centered TS

$$\Delta G_{(\text{sol})}^\ddagger = 22.6 \text{ kcal/mol}$$

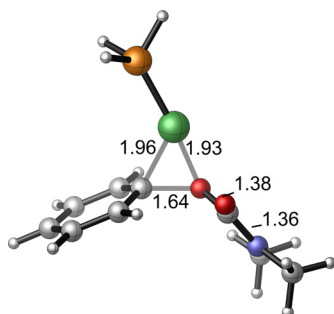

**TS-S3**

mono-ligated 3-centered TS

$$\Delta G_{(\text{sol})}^\ddagger = 27.6 \text{ kcal/mol}$$

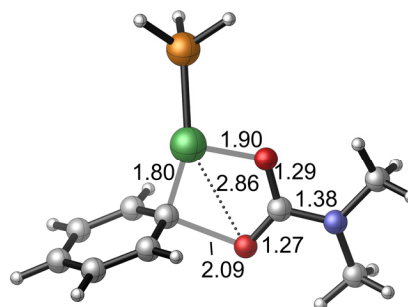

**TS-S4**

mono-ligated 5-centered TS

$$\Delta G_{(\text{sol})}^\ddagger = 16.5 \text{ kcal/mol}$$

Oxidative addition transition states of the couplings with *N,N*-dimethyl phenyl *O*-sulfamate.

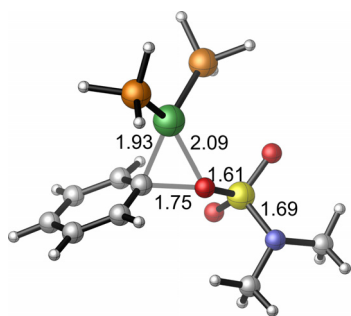

**TS-S5**  
bis-ligated 3-centered TS  
 $\Delta G^\ddagger = 27.3$  kcal/mol

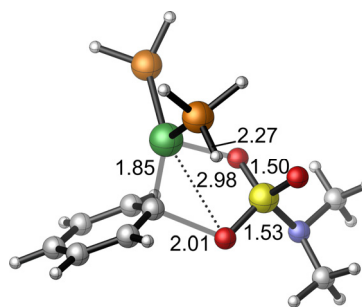

**TS-S6**  
bis-ligated 5-centered TS  
 $\Delta G^\ddagger = 21.0$  kcal/mol

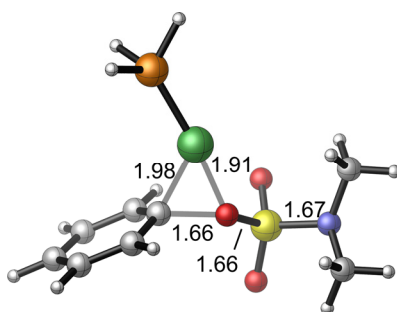

**TS-S7**  
mono-ligated 3-centered TS  
 $\Delta G^\ddagger = 26.2$  kcal/mol

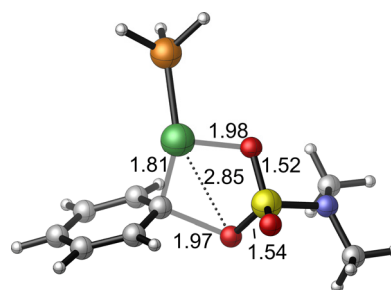

**TS-S8**  
mono-ligated 5-centered TS  
 $\Delta G^\ddagger = 16.5$  kcal/mol

## Possible Isomers of the Transmetallation Transition States

Our calculations suggest that the transmetallation (**TS21**) occurs via a four-center transition state, in consistent with previous theoretical studies. In the most favorable transmetallation transition state (**TS21**), the two aryl groups on the Ni are *cis* to each other. The trans transmetallation transition state (**TS-S9**) is 3.5 kcal/mol higher in energy than **TS21**, presumably due to the repulsions between the PCy<sub>3</sub> ligand and the aryl groups that are adjacent to the ligand. The structures of these transition states are shown below.

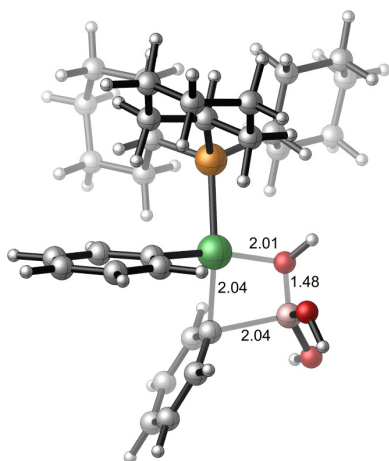

**TS21**  
two aryl groups are *cis*  
 $\Delta\Delta G^\ddagger = 0.0$  kcal/mol

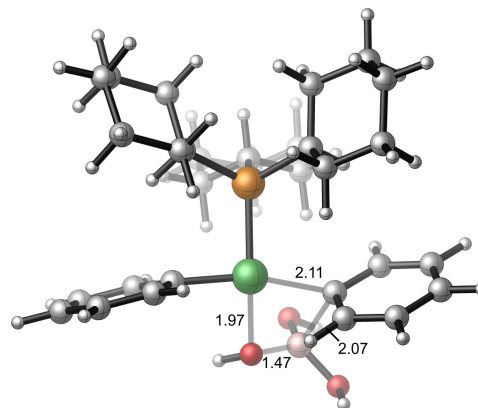

**TS-S9**  
two aryl groups are *trans*  
 $\Delta\Delta G^\ddagger = 3.5$  kcal/mol

## Single Point Calculations using Larger Basis Sets and Other Density Functionals

We have performed single point calculations using higher level methods for the reaction energy profiles of the reactions shown in Figures 3 and 4 in the manuscript. The geometries were optimized using B3LYP and a mixed basis set of LANL2DZ for metal and 6-31G(d) for other atoms. Gas phase singlet point calculations were performed using B3LYP and wB97XD functionals. A considerably larger basis set of SDD for metal and 6-311+G(d,p) for other atoms was used for the single point calculations. wB97XD is one of the newest density functionals from Head-Gordon and coworkers, which includes empirical dispersion as well as long-range corrections.<sup>1</sup> The gas phase Gibbs free energies of the intermediates and transition states in the cross-couplings of phenyl *N,N*-dimethyl *O*-carbamate **15** and phenyl *N,N*-dimethyl *O*-sulfamate **6** are shown below.<sup>2</sup> These energies include zero-point energies and thermal corrections calculated at the B3LYP/LANL2DZ-6-31G(d) level. The single point calculations using xB97XD were calculated using Gaussian 09.

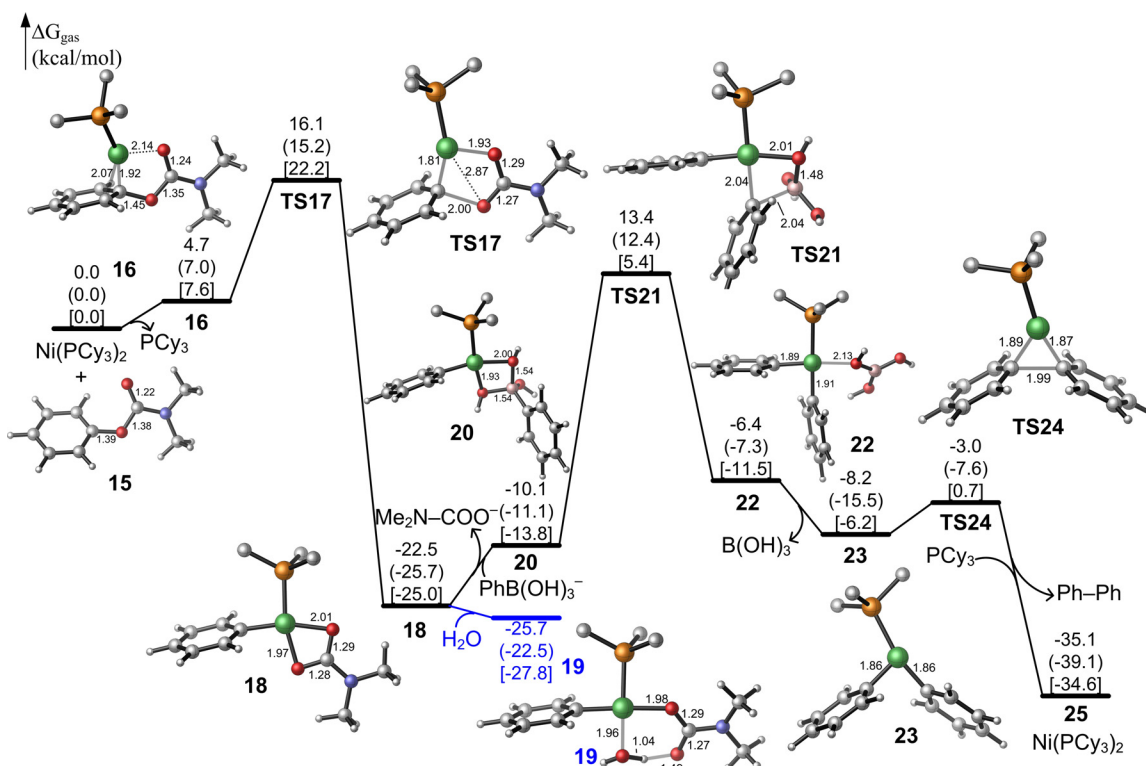

**Figure S1.** Gibbs free energy profile of Ni-catalyzed Suzuki-Miyaura cross-coupling of phenyl *N,N*-dimethyl *O*-carbamate **15** with phenylboronic acid.  $\text{PCy}_3$  was used as ligand in the calculations. The cyclohexyl groups on the ligand are not shown for clarity. Energies reported are gas phase Gibbs free energies calculated using: a) B3LYP/LANL2DZ-6-31G(d); b) B3LYP/SDD-6-311+G(d,p) single point calculations (given in parentheses); c) wB97XD/SDD-6-311+G(d,p) single point calculations (given in brackets). Zero-point energies and thermal corrections calculated at the B3LYP/LANL2DZ-6-31G(d) level are included.

<sup>1</sup> J.-D. Chai and M. Head-Gordon, "Long-range corrected hybrid density functionals with damped atom-atom dispersion corrections," *Phys. Chem. Chem. Phys.*, **2008**, *10*, 6615-6620.

<sup>2</sup> See Figures 3 and 4 in the manuscript for Gibbs free energies in solution calculated at the B3LYP/LANL2DZ-6-31G(d) level.

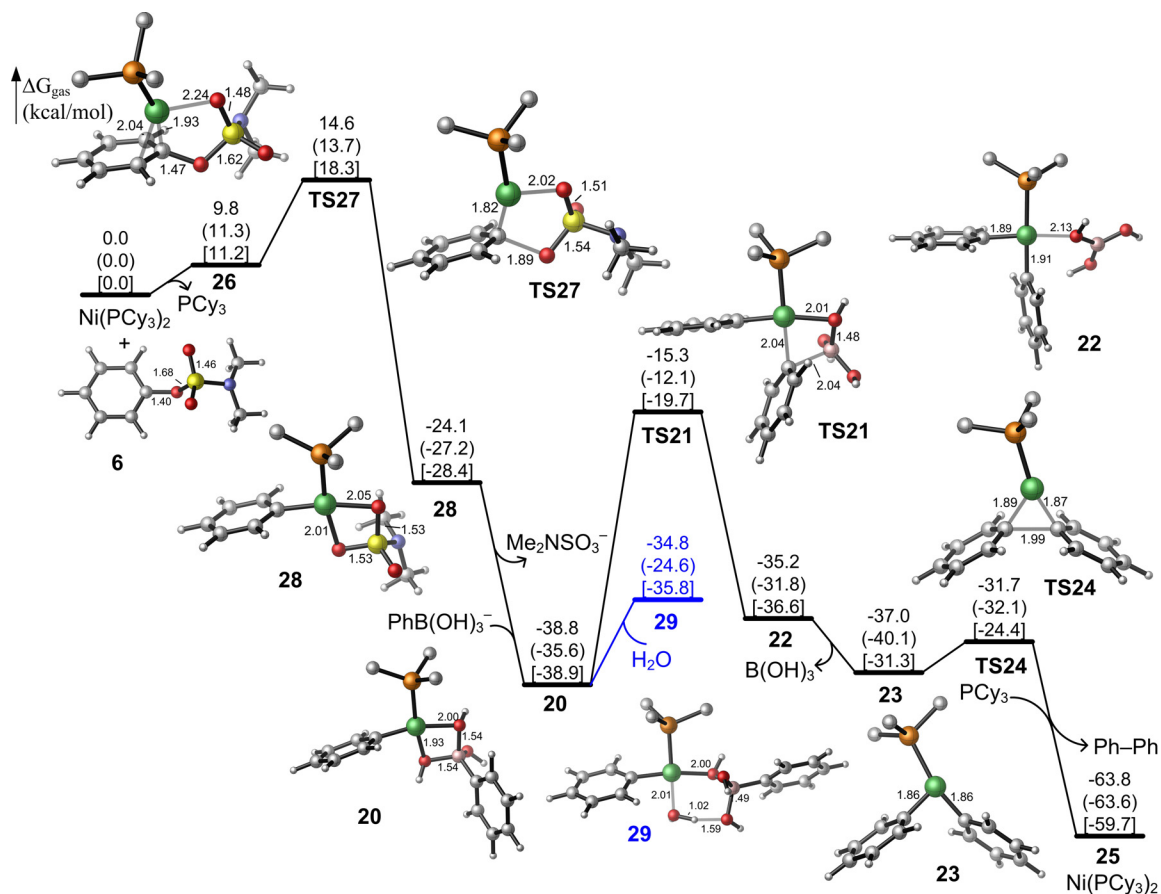

**Figure S2.** Gibbs free energy profile of Ni-catalyzed Suzuki-Miyaura cross-coupling of phenyl *N,N*-dimethyl *O*-sulfamate **6** with phenylboronic acid.  $\text{PCy}_3$  was used as ligand in the calculations. The cyclohexyl groups on the ligand are not shown for clarity. Energies reported are gas phase Gibbs free energies calculated using: a) B3LYP/LANL2DZ-6-31G(d); b) B3LYP/SDD-6-311+G(d,p) single point calculations (given in parentheses); c) wB97XD/SDD-6-311+G(d,p) single point calculations (given in brackets). Zero-point energies and thermal corrections calculated at the B3LYP/LANL2DZ-6-31G(d) level are included.

B3LYP and wB97XD single point calculations with a larger basis set both predict slightly different energetics from B3LYP calculations with the small basis set (LANL2DZ-6-31G(d)). Nonetheless, the calculations at all theoretical levels lead to the same conclusions as discussed in the manuscript: transmetalation is rate-determining for both reactions; carbamates are more reactive than sulfamates in oxidative addition, etc. These benchmark calculations suggest that the theoretical method used in this manuscript (B3LYP with LANL2DZ and 6-31G(d) basis set) is adequate for the purpose of mechanistic studies of Ni-catalyzed Suzuki-Miyaura coupling reactions.



### **Details of Conformational Searches of the PCy<sub>3</sub> ligand**

Conformational searches of the PCy<sub>3</sub> ligand were performed to ensure that the optimized structures involve the lowest energy conformers of PCy<sub>3</sub>. The conformational searches were performed in the following steps: a) the initial geometry of the PCy<sub>3</sub> ligand was taken from the crystal structure of Ni(PCy<sub>3</sub>)(C<sub>2</sub>H<sub>4</sub>)<sub>2</sub> (Krüger and Tsay, *J. Organomet. Chem.* **1972**, *34*, 387); b) several rotamers around the P–Cy bonds and the Ni–P bond were tested as the initial geometry in the optimizations. The lowest energy conformation of the PCy<sub>3</sub> ligand agrees with the previous theoretical study of Liu *et al.* in a related system (ref. 8c).

**The Cartesian coordinates (Å), total SCF energies, enthalpies at 298K, and Gibbs free energies at 298K for the optimized structures.**

For transition state structures, one imaginary frequency was observed and given below. For all minimum structures, no imaginary frequency was observed.

**6**

Total SCF energy: -989.99311599 a.u.  
Enthalpy at 298K: -989.790516 a.u.  
Gibbs free energy at 298K: -989.845611 a.u.  
Free energy in solution at 298K: -989.848304 a.u.

Cartesian coordinates

| ATOM | X         | Y         | Z         |
|------|-----------|-----------|-----------|
| C    | -1.896937 | -1.191843 | -0.333541 |
| C    | -3.280200 | -1.193425 | -0.147545 |
| C    | -1.231503 | 0.030138  | -0.416515 |
| C    | -3.979686 | 0.011834  | -0.047679 |
| C    | -3.294391 | 1.226516  | -0.130063 |
| C    | -1.910894 | 1.242359  | -0.312965 |
| H    | -5.056543 | 0.004495  | 0.095361  |
| H    | -3.835413 | 2.165157  | -0.049688 |
| H    | -1.355544 | 2.172023  | -0.374652 |
| H    | -1.332202 | -2.114446 | -0.410275 |
| H    | -3.810541 | -2.139216 | -0.080910 |
| O    | 0.148631  | 0.047439  | -0.674819 |
| S    | 1.175284  | -0.072937 | 0.646404  |
| O    | 0.990617  | 1.115368  | 1.465502  |
| O    | 1.034014  | -1.410320 | 1.202919  |
| N    | 2.630226  | 0.031446  | -0.142424 |
| C    | 3.002677  | -1.123400 | -0.969593 |
| H    | 2.492326  | -1.115740 | -1.942675 |
| H    | 4.084037  | -1.082170 | -1.130394 |
| H    | 2.761629  | -2.042606 | -0.435962 |
| C    | 2.965838  | 1.342384  | -0.712315 |
| H    | 4.047372  | 1.366591  | -0.875406 |
| H    | 2.452797  | 1.521243  | -1.667533 |
| H    | 2.700448  | 2.124278  | -0.000890 |

**15**

Total SCF energy: -554.78391262 a.u.  
Enthalpy at 298K: -554.582605 a.u.  
Gibbs free energy at 298K: -554.634898 a.u.  
Free energy in solution at 298K: -554.637193 a.u.

Cartesian coordinates

| ATOM | X         | Y        | Z         |
|------|-----------|----------|-----------|
| C    | -1.784087 | 1.246185 | -0.418686 |

|   |           |           |           |
|---|-----------|-----------|-----------|
| C | -3.164118 | 1.050747  | -0.482400 |
| C | -0.971907 | 0.241588  | 0.106145  |
| C | -3.725264 | -0.144564 | -0.028963 |
| C | -2.897870 | -1.141158 | 0.493760  |
| C | -1.516560 | -0.956553 | 0.570319  |
| H | -4.799300 | -0.298800 | -0.081667 |
| H | -3.327700 | -2.073875 | 0.848880  |
| H | -0.871706 | -1.730171 | 0.966758  |
| O | 0.381462  | 0.549993  | 0.218465  |
| C | 1.333045  | -0.372246 | -0.161279 |
| O | 1.074348  | -1.464880 | -0.629101 |
| H | -1.326259 | 2.166928  | -0.766668 |
| H | -3.797790 | 1.833940  | -0.889536 |
| N | 2.590103  | 0.113225  | 0.064484  |
| C | 3.728506  | -0.699848 | -0.333297 |
| H | 4.291468  | -0.210710 | -1.140166 |
| H | 4.404994  | -0.846976 | 0.518473  |
| H | 3.366634  | -1.665938 | -0.681797 |
| C | 2.890253  | 1.441890  | 0.575640  |
| H | 3.588555  | 1.364517  | 1.418921  |
| H | 3.361858  | 2.060681  | -0.201012 |
| H | 1.980063  | 1.930667  | 0.914080  |

## 16

|                                  |                     |
|----------------------------------|---------------------|
| Total SCF energy:                | -1771.26923062 a.u. |
| Enthalpy at 298K:                | -1770.558417 a.u.   |
| Gibbs free energy at 298K:       | -1770.664096 a.u.   |
| Free energy in solution at 298K: | -1770.653913 a.u.   |

## Cartesian coordinates

| ATOM | X         | Y         | Z         |
|------|-----------|-----------|-----------|
| C    | 2.500581  | 1.761771  | -0.177004 |
| C    | 1.546548  | 3.904614  | 0.498993  |
| C    | 0.994648  | 3.003001  | -1.680921 |
| C    | 1.763616  | 1.833505  | -1.414414 |
| H    | 0.514946  | 3.100092  | -2.652940 |
| C    | 0.877078  | 4.013960  | -0.746255 |
| H    | 0.282833  | 4.897096  | -0.964318 |
| H    | 2.052310  | 1.192198  | -2.245523 |
| C    | 2.361381  | 2.822641  | 0.771887  |
| O    | 3.771213  | 1.055359  | -0.136331 |
| C    | 3.717307  | -0.155058 | 0.448195  |
| O    | 2.653228  | -0.668965 | 0.830374  |
| H    | 2.931987  | 2.772807  | 1.696192  |
| H    | 1.443296  | 4.695416  | 1.238083  |
| Ni   | 1.057640  | 0.504242  | 0.010312  |
| P    | -0.963170 | -0.363091 | -0.073380 |
| C    | -2.274938 | 0.877768  | -0.646457 |
| C    | -1.482859 | -1.122614 | 1.580480  |
| C    | -1.187336 | -1.796470 | -1.286495 |

|   |           |           |           |
|---|-----------|-----------|-----------|
| C | -2.388382 | 2.072438  | 0.324156  |
| C | -3.676655 | 0.373619  | -1.050989 |
| H | -1.795181 | 1.271154  | -1.555702 |
| C | -1.074040 | -0.233330 | 2.776444  |
| C | -2.932838 | -1.617088 | 1.748350  |
| H | -0.826661 | -2.005090 | 1.626140  |
| C | -0.263916 | -2.983443 | -0.932530 |
| C | -0.899178 | -1.321496 | -2.728689 |
| H | -2.228702 | -2.147969 | -1.239194 |
| C | -3.228114 | 3.207497  | -0.284962 |
| H | -2.863245 | 1.744012  | 1.259398  |
| H | -1.388176 | 2.439506  | 0.580771  |
| C | -4.513574 | 1.511733  | -1.665020 |
| H | -3.604670 | -0.451770 | -1.768680 |
| H | -4.204533 | -0.020960 | -0.174456 |
| C | -1.260973 | -0.974317 | 4.111428  |
| H | -0.031148 | 0.085137  | 2.660467  |
| H | -1.681038 | 0.681569  | 2.786989  |
| C | -3.115499 | -2.365058 | 3.081856  |
| H | -3.616202 | -0.757689 | 1.731109  |
| H | -3.224126 | -2.267199 | 0.913909  |
| C | -0.371592 | -4.126211 | -1.957541 |
| H | 0.774597  | -2.625732 | -0.886701 |
| H | -0.501783 | -3.374187 | 0.063696  |
| C | -1.009067 | -2.465057 | -3.751279 |
| H | -1.580597 | -0.511508 | -3.013766 |
| H | 0.115202  | -0.898945 | -2.759854 |
| C | -4.617380 | 2.716215  | -0.717987 |
| H | -3.323351 | 4.029893  | 0.436245  |
| H | -2.695681 | 3.616072  | -1.156197 |
| H | -5.514749 | 1.140931  | -1.921962 |
| H | -4.048003 | 1.832239  | -2.609102 |
| C | -2.696297 | -1.496160 | 4.277094  |
| H | -0.560030 | -1.821512 | 4.153752  |
| H | -0.998830 | -0.311095 | 4.946139  |
| H | -2.506838 | -3.281594 | 3.068006  |
| H | -4.159974 | -2.685871 | 3.190905  |
| C | -0.091462 | -3.638978 | -3.385445 |
| H | 0.321952  | -4.932622 | -1.685051 |
| H | -1.383112 | -4.557397 | -1.915255 |
| H | -0.768571 | -2.088963 | -4.754351 |
| H | -2.050605 | -2.817798 | -3.791689 |
| H | -5.190963 | 2.423671  | 0.174541  |
| H | -5.179365 | 3.528956  | -1.196436 |
| H | -2.791607 | -2.063505 | 5.212048  |
| H | -3.384255 | -0.641163 | 4.358911  |
| H | 0.957427  | -3.314809 | -3.458307 |
| H | -0.216348 | -4.461179 | -4.102010 |
| N | 4.927604  | -0.759473 | 0.568284  |
| C | 6.179508  | -0.152935 | 0.137974  |
| H | 6.664896  | -0.783370 | -0.618724 |
| H | 5.990880  | 0.830716  | -0.285497 |

|   |          |           |          |
|---|----------|-----------|----------|
| H | 6.863553 | -0.053105 | 0.991168 |
| C | 5.015132 | -2.082282 | 1.167170 |
| H | 4.014677 | -2.419712 | 1.432132 |
| H | 5.464291 | -2.790793 | 0.459043 |
| H | 5.640185 | -2.052779 | 2.069451 |

### TS17

|                                  |                            |
|----------------------------------|----------------------------|
| Total SCF energy:                | -1771.25063432 a.u.        |
| Enthalpy at 298K:                | -1770.540967 a.u.          |
| Gibbs free energy at 298K:       | -1770.645974 a.u.          |
| Free energy in solution at 298K: | -1770.636428 a.u.          |
| Imaginary frequency:             | -157.6145 cm <sup>-1</sup> |

### Cartesian coordinates

| ATOM | X         | Y         | Z         |
|------|-----------|-----------|-----------|
| C    | 2.154166  | -2.099396 | 0.093676  |
| C    | 1.921133  | -4.221465 | -1.049070 |
| C    | 1.338685  | -4.053044 | 1.295637  |
| C    | 1.704044  | -2.695632 | 1.294963  |
| H    | 0.997897  | -4.514392 | 2.220292  |
| C    | 1.443228  | -4.812743 | 0.133011  |
| H    | 1.169859  | -5.864368 | 0.141339  |
| H    | 1.707227  | -2.130140 | 2.223300  |
| C    | 2.299360  | -2.882511 | -1.074884 |
| O    | 3.867566  | -1.091699 | 0.332015  |
| C    | 3.631782  | 0.128899  | 0.064540  |
| O    | 2.456124  | 0.618508  | -0.136390 |
| H    | 2.700574  | -2.434512 | -1.979498 |
| H    | 2.004479  | -4.817982 | -1.955146 |
| Ni   | 1.040060  | -0.680549 | 0.018829  |
| P    | -0.989370 | 0.433855  | -0.034961 |
| C    | -1.992332 | 0.161338  | 1.544229  |
| C    | -2.005669 | -0.027983 | -1.556711 |
| C    | -0.839527 | 2.308073  | -0.148911 |
| C    | -2.363592 | -1.324139 | 1.744540  |
| C    | -3.215594 | 1.063786  | 1.812145  |
| H    | -1.241575 | 0.399962  | 2.313904  |
| C    | -1.975019 | -1.544135 | -1.855461 |
| C    | -3.445397 | 0.513197  | -1.653452 |
| H    | -1.421535 | 0.449519  | -2.358067 |
| C    | -0.108290 | 2.740944  | -1.439710 |
| C    | -0.087902 | 2.857090  | 1.085568  |
| H    | -1.851445 | 2.739678  | -0.164932 |
| C    | -2.928814 | -1.569137 | 3.153968  |
| H    | -3.121210 | -1.615881 | 1.004262  |
| H    | -1.488181 | -1.961799 | 1.571193  |
| C    | -3.780520 | 0.817739  | 3.223837  |
| H    | -2.951932 | 2.121980  | 1.703962  |
| H    | -4.000623 | 0.859388  | 1.074403  |
| C    | -2.595902 | -1.847669 | -3.230644 |

|   |           |           |           |
|---|-----------|-----------|-----------|
| H | -0.942926 | -1.913123 | -1.816508 |
| H | -2.531646 | -2.090126 | -1.082483 |
| C | -4.056788 | 0.216620  | -3.034785 |
| H | -4.067610 | 0.034096  | -0.886239 |
| H | -3.473585 | 1.591466  | -1.455004 |
| C | 0.059041  | 4.269286  | -1.509148 |
| H | 0.876783  | 2.257171  | -1.466320 |
| H | -0.655314 | 2.403841  | -2.328065 |
| C | 0.077225  | 4.385068  | 1.017598  |
| H | -0.614020 | 2.592143  | 2.010567  |
| H | 0.899636  | 2.379212  | 1.130774  |
| C | -4.131913 | -0.660534 | 3.446611  |
| H | -3.211532 | -2.624034 | 3.262995  |
| H | -2.139064 | -1.378339 | 3.895707  |
| H | -4.664208 | 1.448909  | 3.384239  |
| H | -3.034713 | 1.129973  | 3.969951  |
| C | -4.020374 | -1.285438 | -3.352432 |
| H | -1.963630 | -1.405706 | -4.015122 |
| H | -2.597379 | -2.931125 | -3.405279 |
| H | -3.494816 | 0.766060  | -3.804493 |
| H | -5.088065 | 0.590756  | -3.073973 |
| C | 0.782073  | 4.822083  | -0.273479 |
| H | 0.604417  | 4.537788  | -2.423193 |
| H | -0.932781 | 4.739509  | -1.588652 |
| H | 0.636225  | 4.734509  | 1.895295  |
| H | -0.913657 | 4.861146  | 1.068891  |
| H | -4.963741 | -0.937841 | 2.781858  |
| H | -4.487611 | -0.816388 | 4.473068  |
| H | -4.418647 | -1.471694 | -4.357968 |
| H | -4.680479 | -1.817761 | -2.651298 |
| H | 1.816956  | 4.450702  | -0.262924 |
| H | 0.841844  | 5.916952  | -0.324709 |
| N | 4.699643  | 0.990085  | -0.037365 |
| C | 4.502137  | 2.421991  | -0.171444 |
| H | 5.258054  | 2.835050  | -0.850914 |
| H | 3.510657  | 2.612685  | -0.577255 |
| H | 4.596546  | 2.940004  | 0.796347  |
| C | 6.036191  | 0.552853  | 0.329364  |
| H | 6.767574  | 0.982705  | -0.366392 |
| H | 6.303618  | 0.875129  | 1.347916  |
| H | 6.082833  | -0.533468 | 0.280609  |

### 18

Total SCF energy: -1771.31568369 a.u.  
 Enthalpy at 298K: -1770.603372 a.u.  
 Gibbs free energy at 298K: -1770.707519 a.u.  
 Free energy in solution at 298K: -1770.698085 a.u.

Cartesian coordinates

| ATOM | X | Y | Z |
|------|---|---|---|
|------|---|---|---|

|    |           |           |           |
|----|-----------|-----------|-----------|
| C  | 0.032383  | 2.473411  | -0.106937 |
| C  | 0.898919  | 4.377793  | -1.372512 |
| C  | 1.283156  | 4.256890  | 1.003255  |
| C  | 0.586228  | 3.042925  | 1.050877  |
| H  | 1.695572  | 4.679333  | 1.917744  |
| C  | 1.448091  | 4.925882  | -0.210641 |
| H  | 1.992031  | 5.866551  | -0.250807 |
| H  | 0.471710  | 2.546671  | 2.012567  |
| C  | 0.196919  | 3.168883  | -1.317698 |
| O  | -2.604881 | -0.353512 | -0.266084 |
| C  | -3.354579 | 0.684503  | -0.416430 |
| O  | -2.793713 | 1.839027  | -0.405870 |
| H  | -0.237555 | 2.773195  | -2.234309 |
| H  | 1.011957  | 4.894671  | -2.323656 |
| Ni | -1.065205 | 0.936049  | -0.121715 |
| N  | -4.699638 | 0.561613  | -0.579999 |
| C  | -5.541331 | 1.732306  | -0.754032 |
| H  | -6.055352 | 1.697794  | -1.724596 |
| H  | -6.303013 | 1.779361  | 0.036241  |
| H  | -4.919180 | 2.624935  | -0.707763 |
| C  | -5.339502 | -0.740186 | -0.600962 |
| H  | -5.849797 | -0.905594 | -1.560139 |
| H  | -4.581668 | -1.509505 | -0.460190 |
| H  | -6.086850 | -0.816730 | 0.200952  |
| P  | 0.560436  | -0.553390 | 0.170852  |
| C  | 2.344795  | 0.038742  | 0.094429  |
| C  | 0.238906  | -1.935611 | -1.060966 |
| C  | 0.402107  | -1.375558 | 1.859077  |
| C  | 2.770277  | 0.440183  | -1.335907 |
| C  | 3.422197  | -0.858468 | 0.743632  |
| H  | 2.292016  | 0.970216  | 0.674711  |
| C  | -0.008025 | -1.419464 | -2.496811 |
| C  | 1.239912  | -3.108850 | -1.055869 |
| H  | -0.732132 | -2.310953 | -0.711314 |
| C  | -0.915114 | -2.167991 | 2.020762  |
| C  | 0.529054  | -0.315768 | 2.977088  |
| H  | 1.236356  | -2.084727 | 1.957788  |
| C  | 4.134627  | 1.149913  | -1.325706 |
| H  | 2.843896  | -0.457782 | -1.964835 |
| H  | 2.016876  | 1.094927  | -1.784636 |
| C  | 4.790985  | -0.151467 | 0.745015  |
| H  | 3.153201  | -1.115115 | 1.774092  |
| H  | 3.507082  | -1.805838 | 0.195452  |
| C  | -0.478920 | -2.563094 | -3.411770 |
| H  | -0.761212 | -0.624213 | -2.473975 |
| H  | 0.909909  | -0.983146 | -2.909463 |
| C  | 0.764510  | -4.245364 | -1.979183 |
| H  | 2.220344  | -2.756551 | -1.402964 |
| H  | 1.385805  | -3.493165 | -0.038612 |
| C  | -1.033705 | -2.781179 | 3.427363  |
| H  | -1.767375 | -1.506227 | 1.823607  |
| H  | -0.971634 | -2.972652 | 1.279091  |

|   |           |           |           |
|---|-----------|-----------|-----------|
| C | 0.410662  | -0.939794 | 4.377265  |
| H | 1.478847  | 0.226087  | 2.893840  |
| H | -0.267921 | 0.429098  | 2.844487  |
| C | 5.215421  | 0.283316  | -0.664750 |
| H | 4.424550  | 1.403606  | -2.353387 |
| H | 4.037762  | 2.101128  | -0.783909 |
| H | 5.546360  | -0.815149 | 1.185489  |
| H | 4.734821  | 0.733815  | 1.395222  |
| C | 0.506168  | -3.741511 | -3.406669 |
| H | -1.464571 | -2.911349 | -3.070046 |
| H | -0.617104 | -2.186419 | -4.433270 |
| H | -0.162491 | -4.675702 | -1.572375 |
| H | 1.507664  | -5.053174 | -1.986093 |
| C | -0.899250 | -1.723885 | 4.530741  |
| H | -1.993456 | -3.306190 | 3.515433  |
| H | -0.249148 | -3.541703 | 3.559205  |
| H | 0.478791  | -0.151156 | 5.137374  |
| H | 1.262503  | -1.614805 | 4.549277  |
| H | 5.390514  | -0.611292 | -1.281367 |
| H | 6.168991  | 0.824896  | -0.623031 |
| H | 0.126784  | -4.558358 | -4.033753 |
| H | 1.458670  | -3.420323 | -3.854296 |
| H | -1.747257 | -1.025997 | 4.470822  |
| H | -0.949212 | -2.195732 | 5.520294  |

## 19

|                                  |                     |
|----------------------------------|---------------------|
| Total SCF energy:                | -1847.74856255 a.u. |
| Enthalpy at 298K:                | -1847.008703 a.u.   |
| Gibbs free energy at 298K:       | -1847.116221 a.u.   |
| Free energy in solution at 298K: | -1847.105799 a.u.   |

## Cartesian coordinates

| ATOM | X         | Y         | Z         |
|------|-----------|-----------|-----------|
| C    | 1.358081  | -2.210643 | -0.650918 |
| C    | 3.073118  | -3.583913 | 0.430891  |
| C    | 3.291677  | -3.034459 | -1.905354 |
| C    | 2.087954  | -2.323354 | -1.848541 |
| H    | 3.836221  | -3.101295 | -2.845141 |
| C    | 3.791950  | -3.664650 | -0.762713 |
| H    | 4.726164  | -4.219083 | -0.805618 |
| H    | 1.710841  | -1.858972 | -2.758033 |
| C    | 1.871636  | -2.864749 | 0.483200  |
| O    | -2.195056 | -0.632913 | -0.739812 |
| C    | -3.264151 | -1.352249 | -0.633908 |
| O    | -3.281079 | -2.613512 | -0.526872 |
| H    | 1.334418  | -2.819382 | 1.428418  |
| H    | 3.445011  | -4.080403 | 1.325101  |
| Ni   | -0.365239 | -1.397449 | -0.672881 |
| N    | -4.470802 | -0.679276 | -0.623287 |
| C    | -5.722090 | -1.415130 | -0.622305 |



|   |           |           |           |
|---|-----------|-----------|-----------|
| H | -6.396105 | -1.016660 | 0.148287  |
| H | -6.232154 | -1.331784 | -1.594474 |
| H | -5.514651 | -2.463460 | -0.417267 |
| C | -4.570897 | 0.744944  | -0.864700 |
| H | -5.188855 | 1.224285  | -0.092385 |
| H | -3.576010 | 1.183639  | -0.852727 |
| H | -5.036492 | 0.950042  | -1.841566 |
| H | -0.517056 | -3.795435 | -1.169213 |
| H | -1.978081 | -3.054957 | -1.102596 |
| O | -1.023075 | -3.040299 | -1.508131 |
| P | 0.365205  | 0.529659  | 0.240795  |
| C | -0.392921 | 1.964442  | -0.705589 |
| C | 2.235344  | 0.757174  | 0.392637  |
| C | -0.259910 | 0.741578  | 2.007744  |
| C | -0.275199 | 1.810308  | -2.239115 |
| C | 0.021604  | 3.378815  | -0.250572 |
| H | -1.455921 | 1.829196  | -0.473659 |
| C | 2.905637  | 1.040818  | -0.970588 |
| C | 2.752375  | 1.752342  | 1.456470  |
| H | 2.560577  | -0.246104 | 0.697529  |
| C | 0.154799  | -0.474563 | 2.866878  |
| C | -1.782945 | 0.973144  | 2.112532  |
| H | 0.238783  | 1.634186  | 2.409941  |
| C | -1.088507 | 2.898731  | -2.961237 |
| H | 0.773759  | 1.882861  | -2.550442 |
| H | -0.632853 | 0.818290  | -2.534675 |
| C | -0.795219 | 4.457673  | -0.984867 |
| H | -0.105740 | 3.493175  | 0.833265  |
| H | 1.087216  | 3.537429  | -0.460305 |
| C | 4.437827  | 0.969078  | -0.860491 |
| H | 2.557739  | 0.325445  | -1.721601 |
| H | 2.623546  | 2.043272  | -1.318868 |
| C | 4.288744  | 1.691806  | 1.559689  |
| H | 2.447261  | 2.775729  | 1.202232  |
| H | 2.326759  | 1.532158  | 2.441123  |
| C | -0.293259 | -0.321861 | 4.330034  |
| H | -0.306206 | -1.375762 | 2.439151  |
| H | 1.239650  | -0.630506 | 2.825930  |
| C | -2.226922 | 1.120100  | 3.578808  |
| H | -2.072456 | 1.875855  | 1.562862  |
| H | -2.312612 | 0.138874  | 1.640755  |
| C | -0.684219 | 4.309794  | -2.509115 |
| H | -0.961514 | 2.794821  | -4.046320 |
| H | -2.157899 | 2.743846  | -2.756289 |
| H | -0.459570 | 5.454250  | -0.670103 |
| H | -1.851145 | 4.375033  | -0.687608 |
| C | 4.969744  | 1.935659  | 0.206305  |
| H | 4.729808  | -0.060330 | -0.609809 |
| H | 4.887147  | 1.193425  | -1.836483 |
| H | 4.580988  | 0.701394  | 1.938026  |
| H | 4.634627  | 2.423993  | 2.300852  |
| C | -1.805706 | -0.084597 | 4.430459  |

|   |           |           |           |
|---|-----------|-----------|-----------|
| H | -0.005561 | -1.215942 | 4.897728  |
| H | 0.240250  | 0.524601  | 4.787891  |
| H | -3.315565 | 1.253443  | 3.617382  |
| H | -1.785124 | 2.034582  | 4.002928  |
| H | 0.353903  | 4.506035  | -2.816499 |
| H | -1.305387 | 5.063556  | -3.009459 |
| H | 6.058045  | 1.836085  | 0.306416  |
| H | 4.778312  | 2.970798  | -0.114346 |
| H | -2.337158 | -0.981089 | 4.079268  |
| H | -2.100250 | 0.065843  | 5.476856  |

## 20

|                                  |                     |
|----------------------------------|---------------------|
| Total SCF energy:                | -1932.24103959 a.u. |
| Enthalpy at 298K:                | -1931.483413 a.u.   |
| Gibbs free energy at 298K:       | -1931.593053 a.u.   |
| Free energy in solution at 298K: | -1931.581707 a.u.   |

### Cartesian coordinates

| ATOM | X         | Y         | Z         |
|------|-----------|-----------|-----------|
| C    | -4.253637 | -0.017193 | -0.678303 |
| B    | -2.930670 | -0.002674 | -1.596523 |
| C    | -4.370914 | -0.771127 | 0.501902  |
| H    | -3.533878 | -1.390510 | 0.815152  |
| O    | -2.191640 | 1.346366  | -1.481098 |
| H    | -2.676445 | 2.017195  | -0.978021 |
| O    | -3.119656 | -0.334704 | -2.976375 |
| H    | -4.032801 | -0.603657 | -3.135597 |
| O    | -1.797258 | -0.900254 | -1.052731 |
| H    | -1.521029 | -1.433203 | -1.815489 |
| C    | -5.536255 | -0.754064 | 1.272567  |
| C    | -6.625488 | 0.026699  | 0.879293  |
| H    | -5.597585 | -1.352275 | 2.179407  |
| H    | -7.533546 | 0.042543  | 1.477264  |
| C    | -5.370026 | 0.756216  | -1.053863 |
| C    | -6.539874 | 0.784004  | -0.290919 |
| H    | -5.323838 | 1.347589  | -1.968333 |
| H    | -7.383228 | 1.393145  | -0.608682 |
| C    | 0.057785  | 2.371357  | -0.201503 |
| C    | 0.415232  | 3.201842  | -1.278251 |
| C    | 0.084858  | 2.925710  | 1.089107  |
| C    | 0.805409  | 4.529340  | -1.071683 |
| H    | 0.375729  | 2.816731  | -2.295235 |
| C    | 0.464386  | 4.257881  | 1.299223  |
| H    | -0.197950 | 2.323040  | 1.950078  |
| C    | 0.833403  | 5.062128  | 0.219852  |
| H    | 1.079984  | 5.150132  | -1.922168 |
| H    | 0.469300  | 4.665143  | 2.308417  |
| H    | 1.131684  | 6.095064  | 0.381354  |
| Ni   | -0.631674 | 0.650602  | -0.586505 |
| P    | 1.132995  | -0.495769 | 0.197182  |

|   |           |           |           |
|---|-----------|-----------|-----------|
| C | 2.654118  | 0.497230  | 0.701329  |
| C | 1.575014  | -1.781883 | -1.103452 |
| C | 0.684310  | -1.497800 | 1.729793  |
| C | 3.392610  | 1.101042  | -0.514616 |
| C | 3.658471  | -0.177805 | 1.660968  |
| H | 2.200324  | 1.341269  | 1.237578  |
| C | 1.669580  | -1.195802 | -2.531709 |
| C | 2.786575  | -2.687795 | -0.798892 |
| H | 0.679342  | -2.419776 | -1.093487 |
| C | -0.294119 | -2.657816 | 1.437784  |
| C | 0.104650  | -0.557682 | 2.811649  |
| H | 1.615185  | -1.936068 | 2.115175  |
| C | 4.471847  | 2.100205  | -0.064593 |
| H | 3.873896  | 0.298187  | -1.088928 |
| H | 2.680864  | 1.599718  | -1.179807 |
| C | 4.748242  | 0.818908  | 2.099958  |
| H | 3.151553  | -0.559265 | 2.553565  |
| H | 4.131550  | -1.039938 | 1.172566  |
| C | 1.800180  | -2.316844 | -3.576483 |
| H | 0.787543  | -0.579950 | -2.745967 |
| H | 2.537925  | -0.531269 | -2.609218 |
| C | 2.917658  | -3.803406 | -1.851601 |
| H | 3.704387  | -2.085477 | -0.799184 |
| H | 2.700847  | -3.129575 | 0.201514  |
| C | -0.679472 | -3.406393 | 2.726403  |
| H | -1.193355 | -2.266483 | 0.947417  |
| H | 0.159057  | -3.371654 | 0.739814  |
| C | -0.279023 | -1.319382 | 4.091049  |
| H | 0.819589  | 0.237984  | 3.054997  |
| H | -0.787530 | -0.062883 | 2.403439  |
| C | 5.470969  | 1.450880  | 0.902635  |
| H | 4.994111  | 2.496721  | -0.944528 |
| H | 3.985279  | 2.956327  | 0.423195  |
| H | 5.465549  | 0.310328  | 2.756903  |
| H | 4.282386  | 1.613422  | 2.700976  |
| C | 2.994534  | -3.235153 | -3.276384 |
| H | 0.876044  | -2.914028 | -3.586578 |
| H | 1.896640  | -1.878296 | -4.577336 |
| H | 2.049564  | -4.474656 | -1.774076 |
| H | 3.803601  | -4.413654 | -1.634428 |
| C | -1.257113 | -2.462373 | 3.788424  |
| H | -1.399681 | -4.198114 | 2.484514  |
| H | 0.210686  | -3.907877 | 3.135265  |
| H | -0.715456 | -0.620790 | 4.815984  |
| H | 0.628914  | -1.729359 | 4.558218  |
| H | 6.039241  | 0.673363  | 0.370068  |
| H | 6.203833  | 2.189985  | 1.250125  |
| H | 3.040619  | -4.051930 | -4.007465 |
| H | 3.927628  | -2.662906 | -3.387343 |
| H | -2.205034 | -2.040507 | 3.423971  |
| H | -1.491225 | -3.017530 | 4.705495  |

**TS21**

Total SCF energy: -1932.20428121 a.u.  
Enthalpy at 298K: -1931.448490 a.u.  
Gibbs free energy at 298K: -1931.555638 a.u.  
Free energy in solution at 298K: -1931.542459 a.u.  
Imaginary frequency: -236.1923 cm<sup>-1</sup>

## Cartesian coordinates

| ATOM | X         | Y         | Z         |
|------|-----------|-----------|-----------|
| C    | -3.002195 | -0.998940 | -0.167811 |
| B    | -2.261210 | -2.027182 | -1.766959 |
| C    | -3.134223 | -1.802695 | 0.989589  |
| C    | -4.329945 | -1.876453 | 1.708375  |
| H    | -2.284903 | -2.395720 | 1.329661  |
| O    | -2.213820 | -1.224074 | -2.918132 |
| H    | -3.000340 | -1.399638 | -3.454408 |
| O    | -3.124369 | -3.124134 | -1.845934 |
| H    | -3.189830 | -3.581823 | -0.997692 |
| O    | -0.917628 | -2.226717 | -1.181891 |
| H    | -0.278546 | -2.231211 | -1.913053 |
| C    | -5.440051 | -1.143645 | 1.280697  |
| H    | -4.399164 | -2.501335 | 2.596510  |
| H    | -6.375836 | -1.199637 | 1.831800  |
| C    | -5.344090 | -0.340876 | 0.139635  |
| C    | -4.140510 | -0.265474 | -0.559038 |
| H    | -6.207567 | 0.229442  | -0.195666 |
| H    | -4.077109 | 0.369742  | -1.439254 |
| Ni   | -1.058628 | -0.409470 | -0.345456 |
| C    | -1.557819 | 1.347095  | 0.164526  |
| C    | -1.660548 | 1.830971  | 1.478100  |
| C    | -1.894290 | 2.231504  | -0.878379 |
| C    | -2.054216 | 3.148775  | 1.741823  |
| H    | -1.451937 | 1.174271  | 2.319959  |
| C    | -2.290500 | 3.548271  | -0.621504 |
| H    | -1.861423 | 1.885812  | -1.910539 |
| C    | -2.364679 | 4.016555  | 0.693349  |
| H    | -2.125084 | 3.494262  | 2.771602  |
| H    | -2.544735 | 4.207688  | -1.449454 |
| H    | -2.671346 | 5.039512  | 0.897268  |
| P    | 1.188628  | 0.022510  | -0.059556 |
| C    | 2.228139  | -1.413953 | -0.748620 |
| C    | 1.553476  | 0.265583  | 1.768218  |
| C    | 1.957599  | 1.526262  | -0.896325 |
| C    | 2.033483  | -2.720030 | 0.055032  |
| C    | 3.732088  | -1.170298 | -1.009425 |
| H    | 1.768305  | -1.573213 | -1.738083 |
| C    | 0.810900  | -0.743735 | 2.673414  |
| C    | 3.034328  | 0.382757  | 2.184515  |
| H    | 1.077175  | 1.240241  | 1.946610  |
| C    | 1.626261  | 2.883164  | -0.235479 |

|   |           |           |           |
|---|-----------|-----------|-----------|
| C | 1.575430  | 1.536141  | -2.394561 |
| H | 3.045297  | 1.394201  | -0.824064 |
| C | 2.669753  | -3.922237 | -0.663134 |
| H | 2.509574  | -2.609133 | 1.037895  |
| H | 0.969572  | -2.907260 | 0.227879  |
| C | 4.375184  | -2.378948 | -1.716093 |
| H | 3.884319  | -0.281474 | -1.629925 |
| H | 4.251006  | -0.985363 | -0.060269 |
| C | 0.935229  | -0.344499 | 4.153687  |
| H | -0.243776 | -0.801356 | 2.381247  |
| H | 1.227728  | -1.749560 | 2.541290  |
| C | 3.157947  | 0.776923  | 3.667989  |
| H | 3.537993  | -0.581371 | 2.031324  |
| H | 3.560326  | 1.115999  | 1.561302  |
| C | 2.295331  | 4.042382  | -0.996398 |
| H | 0.543842  | 3.038491  | -0.216563 |
| H | 1.968883  | 2.894509  | 0.805549  |
| C | 2.229876  | 2.709288  | -3.143227 |
| H | 1.862983  | 0.591487  | -2.874215 |
| H | 0.484395  | 1.610464  | -2.480041 |
| C | 4.160075  | -3.686721 | -0.942820 |
| H | 2.531210  | -4.827418 | -0.058524 |
| H | 2.141877  | -4.099563 | -1.612170 |
| H | 5.446720  | -2.190291 | -1.860422 |
| H | 3.939109  | -2.477211 | -2.721425 |
| C | 2.404327  | -0.202979 | 4.579347  |
| H | 0.415756  | 0.611399  | 4.315222  |
| H | 0.426168  | -1.086706 | 4.781653  |
| H | 2.750627  | 1.789271  | 3.805891  |
| H | 4.217260  | 0.825068  | 3.951498  |
| C | 1.900861  | 4.053253  | -2.479725 |
| H | 2.021564  | 4.992838  | -0.521378 |
| H | 3.389475  | 3.953786  | -0.913247 |
| H | 1.900575  | 2.705848  | -4.190119 |
| H | 3.321335  | 2.568796  | -3.158106 |
| H | 4.703501  | -3.637702 | 0.012580  |
| H | 4.584266  | -4.531380 | -1.500174 |
| H | 2.469028  | 0.125009  | 5.624484  |
| H | 2.891304  | -1.188582 | 4.530254  |
| H | 0.821781  | 4.245200  | -2.564256 |
| H | 2.410066  | 4.871765  | -3.004440 |

## 22

|                                  |                     |
|----------------------------------|---------------------|
| Total SCF energy:                | -1932.23376920 a.u. |
| Enthalpy at 298K:                | -1931.475915 a.u.   |
| Gibbs free energy at 298K:       | -1931.587224 a.u.   |
| Free energy in solution at 298K: | -1931.572276 a.u.   |

Cartesian coordinates

| ATOM | X | Y | Z |
|------|---|---|---|
|------|---|---|---|

|    |           |           |           |
|----|-----------|-----------|-----------|
| Ni | -1.279582 | 0.064531  | 0.000764  |
| C  | -3.184040 | 0.227082  | -0.064135 |
| B  | -2.084838 | -2.968418 | -0.592543 |
| C  | -3.934785 | 0.498152  | -1.225128 |
| C  | -5.335870 | 0.438476  | -1.231010 |
| H  | -3.423792 | 0.783025  | -2.143038 |
| O  | -1.579557 | -4.243098 | -0.549065 |
| H  | -2.066638 | -4.824077 | -1.151389 |
| O  | -3.084374 | -2.619299 | -1.428875 |
| H  | -3.386387 | -1.697015 | -1.299455 |
| O  | -1.482156 | -2.043124 | 0.268650  |
| H  | -0.810702 | -2.472201 | 0.819647  |
| C  | -6.029587 | 0.131073  | -0.060492 |
| H  | -5.881705 | 0.644583  | -2.149668 |
| H  | -7.116120 | 0.093014  | -0.058255 |
| C  | -5.310521 | -0.121822 | 1.111196  |
| C  | -3.913439 | -0.080043 | 1.103454  |
| H  | -5.840304 | -0.356536 | 2.032701  |
| H  | -3.384033 | -0.295520 | 2.030715  |
| C  | -1.254366 | 1.934587  | -0.236568 |
| C  | -1.224641 | 2.818127  | 0.858112  |
| C  | -1.210484 | 2.507001  | -1.521162 |
| C  | -1.120363 | 4.202308  | 0.680237  |
| H  | -1.297387 | 2.429210  | 1.871596  |
| C  | -1.105078 | 3.890213  | -1.706222 |
| H  | -1.265532 | 1.869654  | -2.402499 |
| C  | -1.053874 | 4.747028  | -0.604259 |
| H  | -1.101283 | 4.857070  | 1.549675  |
| H  | -1.071406 | 4.298191  | -2.714843 |
| H  | -0.977862 | 5.822487  | -0.744502 |
| P  | 1.091189  | -0.177653 | 0.196571  |
| C  | 2.128172  | 1.320086  | -0.307649 |
| C  | 1.700178  | -1.714516 | -0.720589 |
| C  | 1.627216  | -0.488047 | 1.983662  |
| C  | 2.163266  | 1.525043  | -1.838725 |
| C  | 3.556174  | 1.441995  | 0.268198  |
| H  | 1.528788  | 2.144804  | 0.102744  |
| C  | 1.142251  | -1.796907 | -2.160883 |
| C  | 3.210861  | -2.023784 | -0.706867 |
| H  | 1.206161  | -2.527926 | -0.167085 |
| C  | 1.059347  | -1.796242 | 2.576996  |
| C  | 1.216255  | 0.698320  | 2.885237  |
| H  | 2.722964  | -0.570179 | 1.995773  |
| C  | 2.773491  | 2.890627  | -2.198808 |
| H  | 2.769475  | 0.733851  | -2.300312 |
| H  | 1.154231  | 1.449523  | -2.254494 |
| C  | 4.174605  | 2.806661  | -0.091119 |
| H  | 3.558539  | 1.330305  | 1.357338  |
| H  | 4.193571  | 0.642176  | -0.131131 |
| C  | 1.420712  | -3.177819 | -2.778411 |
| H  | 0.065759  | -1.590568 | -2.160338 |
| H  | 1.605034  | -1.024442 | -2.786307 |

|   |           |           |           |
|---|-----------|-----------|-----------|
| C | 3.496202  | -3.401544 | -1.334360 |
| H | 3.747605  | -1.252407 | -1.274130 |
| H | 3.607033  | -1.994525 | 0.315544  |
| C | 1.527954  | -2.010256 | 4.028079  |
| H | -0.040467 | -1.745386 | 2.573883  |
| H | 1.355271  | -2.664176 | 1.974611  |
| C | 1.685055  | 0.498156  | 4.336015  |
| H | 1.609206  | 1.643492  | 2.495546  |
| H | 0.122046  | 0.791314  | 2.864460  |
| C | 4.179886  | 3.053146  | -1.605923 |
| H | 2.805601  | 3.002744  | -3.290357 |
| H | 2.114081  | 3.683744  | -1.820561 |
| H | 5.194701  | 2.865504  | 0.310388  |
| H | 3.596487  | 3.600815  | 0.403348  |
| C | 2.919625  | -3.512880 | -2.753696 |
| H | 0.861185  | -3.939586 | -2.216472 |
| H | 1.042418  | -3.205702 | -3.808285 |
| H | 3.051838  | -4.182951 | -0.700112 |
| H | 4.578019  | -3.586952 | -1.345771 |
| C | 1.158443  | -0.818885 | 4.922599  |
| H | 1.092668  | -2.936755 | 4.423607  |
| H | 2.618876  | -2.149113 | 4.034280  |
| H | 1.357293  | 1.346548  | 4.949845  |
| H | 2.784859  | 0.497311  | 4.365951  |
| H | 4.861582  | 2.334995  | -2.086318 |
| H | 4.574787  | 4.053115  | -1.826099 |
| H | 3.092756  | -4.519985 | -3.153637 |
| H | 3.455845  | -2.817154 | -3.416159 |
| H | 0.063696  | -0.761492 | 5.013256  |
| H | 1.548736  | -0.970657 | 5.936733  |

### 23

|                                  |                     |
|----------------------------------|---------------------|
| Total SCF energy:                | -1679.74041839 a.u. |
| Enthalpy at 298K:                | -1679.039423 a.u.   |
| Gibbs free energy at 298K:       | -1679.141538 a.u.   |
| Free energy in solution at 298K: | -1679.129937 a.u.   |

### Cartesian coordinates

| ATOM | X         | Y         | Z         |
|------|-----------|-----------|-----------|
| Ni   | -1.305096 | 0.436096  | -0.072545 |
| C    | -2.096689 | -1.154744 | 0.488354  |
| C    | -2.676490 | -2.054585 | -0.421299 |
| C    | -3.086091 | -3.326923 | -0.008236 |
| H    | -2.815169 | -1.766133 | -1.460565 |
| C    | -2.948343 | -3.715974 | 1.326555  |
| H    | -3.525045 | -4.011405 | -0.731515 |
| H    | -3.274212 | -4.702004 | 1.647922  |
| C    | -2.404625 | -2.817493 | 2.246606  |
| C    | -1.989998 | -1.545937 | 1.833670  |
| H    | -2.306690 | -3.101717 | 3.292615  |

|   |           |           |           |
|---|-----------|-----------|-----------|
| H | -1.582050 | -0.860178 | 2.573542  |
| C | -3.001637 | 1.201577  | -0.028759 |
| C | -3.667321 | 1.434392  | -1.248174 |
| C | -3.524273 | 1.808025  | 1.129114  |
| C | -4.775527 | 2.284965  | -1.318190 |
| H | -3.321191 | 0.949142  | -2.159985 |
| C | -4.631500 | 2.658488  | 1.063668  |
| H | -3.065187 | 1.614043  | 2.096834  |
| C | -5.258429 | 2.901406  | -0.161618 |
| H | -5.267754 | 2.458539  | -2.273178 |
| H | -5.012561 | 3.124833  | 1.970117  |
| H | -6.125513 | 3.555698  | -0.212042 |
| P | 0.992879  | 0.041413  | -0.237175 |
| C | 1.713216  | -0.524012 | 1.408034  |
| C | 1.824407  | 1.634586  | -0.817791 |
| C | 1.568956  | -1.249147 | -1.480575 |
| C | 1.491209  | 0.525869  | 2.518944  |
| C | 3.165838  | -1.045221 | 1.440991  |
| H | 1.051863  | -1.371220 | 1.646177  |
| C | 1.130194  | 2.884988  | -0.228744 |
| C | 3.355756  | 1.748700  | -0.684658 |
| H | 1.589506  | 1.634308  | -1.892882 |
| C | 1.043307  | -0.925195 | -2.898037 |
| C | 1.114401  | -2.668248 | -1.066400 |
| H | 2.668787  | -1.229009 | -1.508466 |
| C | 1.835092  | -0.049828 | 3.903463  |
| H | 2.127016  | 1.402339  | 2.331592  |
| H | 0.452464  | 0.879012  | 2.502544  |
| C | 3.504076  | -1.626490 | 2.826650  |
| H | 3.325414  | -1.811202 | 0.673972  |
| H | 3.862841  | -0.228851 | 1.217726  |
| C | 1.655860  | 4.174193  | -0.882741 |
| H | 0.042148  | 2.817355  | -0.368462 |
| H | 1.300319  | 2.932790  | 0.854654  |
| C | 3.875422  | 3.037510  | -1.347432 |
| H | 3.629926  | 1.763805  | 0.378367  |
| H | 3.850631  | 0.875078  | -1.126381 |
| C | 1.476351  | -1.986049 | -3.924669 |
| H | -0.054389 | -0.873684 | -2.865727 |
| H | 1.393474  | 0.058583  | -3.231914 |
| C | 1.552993  | -3.726526 | -2.093627 |
| H | 1.513820  | -2.932808 | -0.080914 |
| H | 0.021407  | -2.681978 | -0.971852 |
| C | 3.267854  | -0.601511 | 3.945633  |
| H | 1.700876  | 0.723531  | 4.670557  |
| H | 1.126192  | -0.855594 | 4.142991  |
| H | 4.546138  | -1.971128 | 2.838842  |
| H | 2.879157  | -2.513314 | 3.007572  |
| C | 3.184064  | 4.283848  | -0.774767 |
| H | 1.365182  | 4.182231  | -1.943670 |
| H | 1.175870  | 5.046188  | -0.421273 |
| H | 3.693629  | 2.985332  | -2.431104 |



|   |           |           |           |
|---|-----------|-----------|-----------|
| H | 4.962804  | 3.109581  | -1.216648 |
| C | 1.042212  | -3.395425 | -3.502575 |
| H | 1.060942  | -1.734601 | -4.908880 |
| H | 2.571082  | -1.959237 | -4.031253 |
| H | 1.191048  | -4.713014 | -1.777712 |
| H | 2.651780  | -3.786666 | -2.110396 |
| H | 3.978955  | 0.229981  | 3.829086  |
| H | 3.473342  | -1.052833 | 4.924477  |
| H | 3.537654  | 5.185180  | -1.291020 |
| H | 3.465168  | 4.398867  | 0.282662  |
| H | -0.055803 | -3.455261 | -3.512602 |
| H | 1.403942  | -4.137883 | -4.225261 |

### TS24

|                                  |                            |
|----------------------------------|----------------------------|
| Total SCF energy:                | -1679.73338946 a.u.        |
| Enthalpy at 298K:                | -1679.033395 a.u.          |
| Gibbs free energy at 298K:       | -1679.133182 a.u.          |
| Free energy in solution at 298K: | -1679.125421 a.u.          |
| Imaginary frequency:             | -244.4653 cm <sup>-1</sup> |

### Cartesian coordinates

| ATOM | X         | Y         | Z         |
|------|-----------|-----------|-----------|
| C    | -2.652040 | -1.603029 | 0.149505  |
| C    | -2.986331 | -2.296102 | -1.032997 |
| C    | -2.975760 | -2.206385 | 1.382529  |
| C    | -3.571045 | -3.562690 | -0.982467 |
| H    | -2.788346 | -1.844301 | -2.001683 |
| C    | -3.561120 | -3.473115 | 1.430270  |
| H    | -2.769964 | -1.683702 | 2.313163  |
| C    | -3.859749 | -4.157565 | 0.248907  |
| H    | -3.807401 | -4.084586 | -1.907287 |
| H    | -3.790277 | -3.924964 | 2.392958  |
| C    | -2.754156 | 0.384774  | 0.078488  |
| C    | -3.213099 | 0.923372  | -1.142993 |
| C    | -3.163704 | 1.025855  | 1.267751  |
| C    | -3.987614 | 2.084467  | -1.175201 |
| H    | -2.957521 | 0.435737  | -2.080109 |
| C    | -3.937885 | 2.187213  | 1.232396  |
| H    | -2.869050 | 0.619810  | 2.231922  |
| C    | -4.350717 | 2.728184  | 0.011335  |
| H    | -4.313196 | 2.485354  | -2.132858 |
| H    | -4.223871 | 2.669294  | 2.164919  |
| H    | -4.325887 | -5.138687 | 0.287181  |
| H    | -4.962371 | 3.626098  | -0.014352 |
| Ni   | -1.109108 | -0.540889 | 0.092413  |
| P    | 1.022889  | 0.200853  | -0.019529 |
| C    | 1.898499  | -0.481139 | -1.546645 |
| C    | 2.013570  | -0.162609 | 1.548152  |
| C    | 1.164757  | 2.072557  | -0.209776 |
| C    | 1.646739  | -1.993922 | -1.736761 |

|   |           |           |           |
|---|-----------|-----------|-----------|
| C | 3.389063  | -0.152302 | -1.763397 |
| H | 1.334308  | 0.020629  | -2.347622 |
| C | 2.074186  | -1.674336 | 1.857731  |
| C | 3.406132  | 0.480064  | 1.709059  |
| H | 1.360357  | 0.282852  | 2.314404  |
| C | 0.573071  | 2.784855  | 1.028417  |
| C | 0.458028  | 2.561650  | -1.493746 |
| H | 2.231043  | 2.332509  | -0.284799 |
| C | 2.117449  | -2.460949 | -3.124381 |
| H | 2.184315  | -2.562817 | -0.966599 |
| H | 0.580414  | -2.214732 | -1.603615 |
| C | 3.857303  | -0.614168 | -3.155830 |
| H | 3.575716  | 0.922105  | -1.645377 |
| H | 3.993470  | -0.663715 | -1.002865 |
| C | 2.641352  | -1.930539 | 3.264650  |
| H | 1.075073  | -2.118218 | 1.763350  |
| H | 2.715600  | -2.177090 | 1.120992  |
| C | 3.971714  | 0.222983  | 3.118517  |
| H | 4.098216  | 0.063042  | 0.967807  |
| H | 3.361931  | 1.559455  | 1.524029  |
| C | 0.614192  | 4.316120  | 0.887042  |
| H | -0.467792 | 2.460007  | 1.160645  |
| H | 1.113800  | 2.491563  | 1.936155  |
| C | 0.501618  | 4.094076  | -1.624372 |
| H | 0.918948  | 2.113348  | -2.382050 |
| H | -0.588081 | 2.228788  | -1.473644 |
| C | 3.592652  | -2.112008 | -3.372681 |
| H | 1.959343  | -3.542173 | -3.226305 |
| H | 1.496226  | -1.980339 | -3.894807 |
| H | 4.925227  | -0.393133 | -3.281157 |
| H | 3.325983  | -0.034980 | -3.925498 |
| C | 4.018959  | -1.276812 | 3.446024  |
| H | 1.944177  | -1.524873 | 4.012610  |
| H | 2.703787  | -3.010599 | 3.449251  |
| H | 3.340923  | 0.736531  | 3.859289  |
| H | 4.973227  | 0.664409  | 3.202617  |
| C | -0.094679 | 4.784054  | -0.390448 |
| H | 0.155525  | 4.776754  | 1.771419  |
| H | 1.661750  | 4.652946  | 0.866233  |
| H | -0.037063 | 4.397911  | -2.531125 |
| H | 1.544397  | 4.420489  | -1.755839 |
| H | 4.222205  | -2.692332 | -2.681615 |
| H | 3.889385  | -2.407247 | -4.387168 |
| H | 4.382387  | -1.431342 | 4.469931  |
| H | 4.743027  | -1.769137 | 2.779658  |
| H | -1.164782 | 4.541358  | -0.321079 |
| H | -0.021766 | 5.874721  | -0.490170 |

26

Total SCF energy:

-2206.47138322 a.u.

S26

Enthalpy at 298K: -2205.759407 a.u.  
Gibbs free energy at 298K: -2205.866773 a.u.  
Free energy in solution at 298K: -2205.864654 a.u.

Cartesian coordinates

| ATOM | X         | Y         | Z         |
|------|-----------|-----------|-----------|
| C    | 2.317244  | 1.506834  | -0.802649 |
| C    | 1.779867  | 3.742867  | -0.005315 |
| C    | 0.656369  | 2.891187  | -1.979763 |
| C    | 1.332119  | 1.639079  | -1.849105 |
| H    | -0.009968 | 3.037095  | -2.827477 |
| C    | 0.859007  | 3.911656  | -1.074235 |
| H    | 0.331017  | 4.854947  | -1.184235 |
| H    | 1.380490  | 0.973590  | -2.709026 |
| C    | 2.524070  | 2.587560  | 0.112966  |
| O    | 3.479864  | 0.651539  | -1.078247 |
| O    | 2.342037  | -0.983931 | 0.473606  |
| H    | 3.282246  | 2.483250  | 0.883629  |
| H    | 1.927073  | 4.548593  | 0.709639  |
| Ni   | 0.795345  | 0.438903  | -0.292661 |
| P    | -1.270315 | -0.313476 | -0.026804 |
| C    | -2.575786 | 0.955119  | -0.539281 |
| C    | -1.608454 | -0.907062 | 1.737122  |
| C    | -1.699166 | -1.825501 | -1.075219 |
| C    | -2.519444 | 2.216054  | 0.349400  |
| C    | -4.036520 | 0.497791  | -0.737067 |
| H    | -2.191623 | 1.257802  | -1.525218 |
| C    | -1.003323 | 0.040847  | 2.797210  |
| C    | -3.050877 | -1.292527 | 2.119549  |
| H    | -1.003154 | -1.825182 | 1.774973  |
| C    | -0.795258 | -3.029284 | -0.727331 |
| C    | -1.566272 | -1.489335 | -2.578298 |
| H    | -2.742809 | -2.110551 | -0.875833 |
| C    | -3.378335 | 3.349922  | -0.235140 |
| H    | -2.891359 | 1.973423  | 1.354729  |
| H    | -1.480545 | 2.547390  | 0.459814  |
| C    | -4.891247 | 1.634755  | -1.328519 |
| H    | -4.088615 | -0.376696 | -1.395763 |
| H    | -4.469347 | 0.191758  | 0.223008  |
| C    | -1.059666 | -0.587421 | 4.200363  |
| H    | 0.032230  | 0.283773  | 2.529973  |
| H    | -1.553282 | 0.991028  | 2.808769  |
| C    | -3.104703 | -1.925681 | 3.522073  |
| H    | -3.681262 | -0.393690 | 2.114136  |
| H    | -3.480001 | -1.983325 | 1.383301  |
| C    | -1.086458 | -4.244995 | -1.624385 |
| H    | 0.256132  | -2.730366 | -0.838632 |
| H    | -0.925533 | -3.322041 | 0.320940  |
| C    | -1.863368 | -2.705466 | -3.471493 |
| H    | -2.232541 | -0.662887 | -2.852800 |
| H    | -0.541516 | -1.140127 | -2.768993 |
| C    | -4.829418 | 2.901825  | -0.463029 |

|   |           |           |           |
|---|-----------|-----------|-----------|
| H | -3.348503 | 4.221719  | 0.431476  |
| H | -2.940795 | 3.672390  | -1.191373 |
| H | -5.930569 | 1.299084  | -1.440532 |
| H | -4.527946 | 1.869352  | -2.340255 |
| C | -2.489343 | -1.000140 | 4.581980  |
| H | -0.408211 | -1.473925 | 4.224323  |
| H | -0.656509 | 0.116187  | 4.940433  |
| H | -2.555859 | -2.879151 | 3.508663  |
| H | -4.143373 | -2.167385 | 3.783089  |
| C | -0.966208 | -3.897814 | -3.114164 |
| H | -0.402324 | -5.063550 | -1.366315 |
| H | -2.103808 | -4.611145 | -1.419228 |
| H | -1.732336 | -2.429475 | -4.525916 |
| H | -2.918520 | -2.994757 | -3.353147 |
| H | -5.301249 | 2.697108  | 0.509837  |
| H | -5.410907 | 3.708711  | -0.927513 |
| H | -2.496303 | -1.489193 | 5.564625  |
| H | -3.112402 | -0.098153 | 4.677353  |
| H | 0.079448  | -3.645656 | -3.343760 |
| H | -1.222363 | -4.768438 | -3.731572 |
| S | 3.643888  | -0.655406 | -0.142495 |
| O | 4.341432  | -1.658773 | -0.938303 |
| N | 4.618113  | -0.037706 | 1.100648  |
| C | 4.631592  | -0.896263 | 2.298291  |
| H | 5.172762  | -1.840001 | 2.136543  |
| H | 5.129117  | -0.335262 | 3.094567  |
| H | 3.607026  | -1.108584 | 2.604045  |
| C | 5.965032  | 0.337265  | 0.636534  |
| H | 5.879980  | 1.003092  | -0.223931 |
| H | 6.452888  | 0.880032  | 1.451346  |
| H | 6.573811  | -0.535785 | 0.364846  |

### TS27

|                                  |                            |
|----------------------------------|----------------------------|
| Total SCF energy:                | -2206.46074180 a.u.        |
| Enthalpy at 298K:                | -2205.750160 a.u.          |
| Gibbs free energy at 298K:       | -2205.858977 a.u.          |
| Free energy in solution at 298K: | -2205.852475 a.u.          |
| Imaginary frequency:             | -242.0483 cm <sup>-1</sup> |

### Cartesian coordinates

| ATOM | X         | Y        | Z         |
|------|-----------|----------|-----------|
| C    | -2.103472 | 1.937207 | 0.220486  |
| C    | -1.790536 | 4.239685 | -0.408116 |
| C    | -1.217229 | 3.528931 | 1.839502  |
| C    | -1.624819 | 2.208456 | 1.529266  |
| H    | -0.883292 | 3.759352 | 2.848897  |
| C    | -1.286245 | 4.526614 | 0.880556  |
| H    | -0.975779 | 5.539186 | 1.122656  |
| H    | -1.732974 | 1.473542 | 2.323186  |
| C    | -2.234939 | 2.969854 | -0.739200 |

|    |           |           |           |
|----|-----------|-----------|-----------|
| O  | -3.662518 | 0.869558  | 0.156163  |
| O  | -1.987869 | -0.781904 | -0.645404 |
| H  | -2.654239 | 2.750207  | -1.715999 |
| H  | -1.837435 | 5.029992  | -1.153768 |
| Ni | -0.808562 | 0.668508  | 0.126633  |
| S  | -3.406283 | -0.289276 | -0.832657 |
| O  | -3.795104 | 0.021338  | -2.207564 |
| N  | -4.365687 | -1.579518 | -0.310527 |
| C  | -4.071210 | -2.045514 | 1.047808  |
| H  | -4.401214 | -1.333648 | 1.819456  |
| H  | -4.593936 | -2.996183 | 1.193239  |
| H  | -2.999013 | -2.219367 | 1.145232  |
| C  | -5.798899 | -1.389787 | -0.571455 |
| H  | -5.934459 | -1.046268 | -1.597231 |
| H  | -6.289277 | -2.361632 | -0.456666 |
| H  | -6.261771 | -0.670556 | 0.120998  |
| P  | 1.265041  | -0.289591 | 0.164194  |
| C  | 2.660177  | 0.976326  | 0.220704  |
| C  | 1.429613  | -1.410636 | -1.343902 |
| C  | 1.623759  | -1.431524 | 1.619304  |
| C  | 2.361311  | 2.211932  | -0.658478 |
| C  | 4.098350  | 0.473406  | -0.016219 |
| H  | 2.600447  | 1.327058  | 1.262328  |
| C  | 1.336037  | -0.612480 | -2.662871 |
| C  | 2.595714  | -2.419585 | -1.404381 |
| H  | 0.495574  | -1.987702 | -1.270717 |
| C  | 0.584204  | -2.574852 | 1.661717  |
| C  | 1.621207  | -0.668302 | 2.962267  |
| H  | 2.621076  | -1.873206 | 1.480070  |
| C  | 3.391725  | 3.326973  | -0.410866 |
| H  | 2.384825  | 1.931067  | -1.719440 |
| H  | 1.349319  | 2.580071  | -0.451945 |
| C  | 5.125401  | 1.592166  | 0.236813  |
| H  | 4.321899  | -0.390005 | 0.622842  |
| H  | 4.197834  | 0.131022  | -1.054607 |
| C  | 1.181162  | -1.553457 | -3.869413 |
| H  | 0.491237  | 0.085514  | -2.622304 |
| H  | 2.245967  | -0.010586 | -2.795349 |
| C  | 2.434624  | -3.363439 | -2.610996 |
| H  | 3.551132  | -1.887778 | -1.492651 |
| H  | 2.651508  | -3.012114 | -0.483710 |
| C  | 0.809519  | -3.515225 | 2.857666  |
| H  | -0.420695 | -2.133729 | 1.726336  |
| H  | 0.606010  | -3.153734 | 0.731844  |
| C  | 1.842896  | -1.610693 | 4.158607  |
| H  | 2.395026  | 0.107722  | 2.969575  |
| H  | 0.657512  | -0.151329 | 3.077369  |
| C  | 4.830711  | 2.831783  | -0.620586 |
| H  | 3.181819  | 4.178816  | -1.070125 |
| H  | 3.281169  | 3.695227  | 0.619982  |
| H  | 6.138322  | 1.220048  | 0.035529  |
| H  | 5.100448  | 1.871014  | 1.300787  |

|   |           |           |           |
|---|-----------|-----------|-----------|
| C | 2.316513  | -2.586215 | -3.930289 |
| H | 0.215345  | -2.072878 | -3.794775 |
| H | 1.149314  | -0.965982 | -4.795855 |
| H | 1.532301  | -3.976274 | -2.469187 |
| H | 3.282182  | -4.060007 | -2.652202 |
| C | 0.813734  | -2.748550 | 4.186770  |
| H | 0.035113  | -4.292887 | 2.865655  |
| H | 1.771854  | -4.034066 | 2.734970  |
| H | 1.803751  | -1.034818 | 5.092140  |
| H | 2.854612  | -2.038569 | 4.097944  |
| H | 4.975574  | 2.578762  | -1.681521 |
| H | 5.546561  | 3.631274  | -0.390603 |
| H | 2.157330  | -3.279527 | -4.765961 |
| H | 3.267076  | -2.068913 | -4.130210 |
| H | -0.186895 | -2.327866 | 4.366124  |
| H | 1.021388  | -3.429967 | 5.021497  |

## 28

|                                  |                     |
|----------------------------------|---------------------|
| Total SCF energy:                | -2206.52941939 a.u. |
| Enthalpy at 298K:                | -2205.815303 a.u.   |
| Gibbs free energy at 298K:       | -2205.920704 a.u.   |
| Free energy in solution at 298K: | -2205.912019 a.u.   |

## Cartesian coordinates

| ATOM | X         | Y         | Z         |
|------|-----------|-----------|-----------|
| C    | -0.086227 | 2.395842  | -0.035276 |
| C    | 0.547410  | 4.325576  | -1.389165 |
| C    | 0.818733  | 4.407474  | 1.005018  |
| C    | 0.310876  | 3.106752  | 1.107028  |
| H    | 1.113389  | 4.943127  | 1.905168  |
| C    | 0.942997  | 5.019624  | -0.243668 |
| H    | 1.338729  | 6.029045  | -0.323166 |
| H    | 0.214186  | 2.658150  | 2.092905  |
| C    | 0.039416  | 3.025535  | -1.284009 |
| O    | -2.302546 | -0.818115 | 0.055596  |
| O    | -2.835497 | 1.496423  | 0.177901  |
| H    | -0.269939 | 2.509335  | -2.191517 |
| H    | 0.631087  | 4.795275  | -2.367118 |
| Ni   | -0.973051 | 0.739744  | 0.054000  |
| S    | -3.488382 | 0.116689  | 0.274886  |
| O    | -4.300134 | -0.119232 | 1.462238  |
| N    | -4.497971 | -0.134585 | -1.052461 |
| C    | -5.840529 | 0.447279  | -0.915909 |
| H    | -5.840341 | 1.540598  | -1.042121 |
| H    | -6.475153 | 0.002603  | -1.688832 |
| H    | -6.245074 | 0.194199  | 0.063535  |
| C    | -3.873081 | 0.117391  | -2.354017 |
| H    | -2.922115 | -0.414355 | -2.406835 |
| H    | -4.536350 | -0.283300 | -3.126814 |
| H    | -3.706593 | 1.188323  | -2.542769 |

|   |           |           |           |
|---|-----------|-----------|-----------|
| P | 0.867713  | -0.499887 | 0.145332  |
| C | 2.533861  | 0.344042  | -0.096873 |
| C | 0.640282  | -1.942152 | -1.034828 |
| C | 0.974178  | -1.291393 | 1.852289  |
| C | 2.799002  | 0.729015  | -1.569274 |
| C | 3.773750  | -0.358602 | 0.499721  |
| H | 2.387167  | 1.284219  | 0.451888  |
| C | 0.279453  | -1.507208 | -2.472800 |
| C | 1.760475  | -3.003284 | -1.051874 |
| H | -0.266573 | -2.407323 | -0.624594 |
| C | -0.167013 | -2.292693 | 2.140533  |
| C | 1.014034  | -0.199011 | 2.945265  |
| H | 1.922129  | -1.846591 | 1.883423  |
| C | 4.036289  | 1.634990  | -1.686211 |
| H | 2.971214  | -0.179613 | -2.161918 |
| H | 1.927526  | 1.237413  | -1.992134 |
| C | 5.019669  | 0.539266  | 0.373747  |
| H | 3.619490  | -0.601333 | 1.556140  |
| H | 3.957369  | -1.308491 | -0.020041 |
| C | -0.136698 | -2.722920 | -3.318515 |
| H | -0.530489 | -0.769496 | -2.446196 |
| H | 1.137422  | -1.017852 | -2.948873 |
| C | 1.349942  | -4.217077 | -1.906415 |
| H | 2.676376  | -2.564185 | -1.469967 |
| H | 2.004964  | -3.333133 | -0.034858 |
| C | -0.035290 | -2.892044 | 3.552212  |
| H | -1.135433 | -1.790542 | 2.035706  |
| H | -0.159531 | -3.106524 | 1.406937  |
| C | 1.146962  | -0.805623 | 4.351793  |
| H | 1.834653  | 0.505802  | 2.765056  |
| H | 0.084110  | 0.383480  | 2.891140  |
| C | 5.277853  | 0.969688  | -1.076707 |
| H | 4.213767  | 1.879798  | -2.741226 |
| H | 3.832622  | 2.585513  | -1.173761 |
| H | 5.893024  | 0.012003  | 0.778568  |
| H | 4.877102  | 1.433802  | 0.997369  |
| C | 0.956482  | -3.802308 | -3.331752 |
| H | -1.064240 | -3.146913 | -2.907313 |
| H | -0.365161 | -2.401077 | -4.342626 |
| H | 0.499144  | -4.721760 | -1.425975 |
| H | 2.170825  | -4.945060 | -1.932878 |
| C | 0.019840  | -1.807307 | 4.636105  |
| H | -0.876048 | -3.572474 | 3.735661  |
| H | 0.879083  | -3.502612 | 3.604154  |
| H | 1.145256  | -0.001969 | 5.098916  |
| H | 2.119423  | -1.313082 | 4.439613  |
| H | 5.545104  | 0.085205  | -1.674442 |
| H | 6.138418  | 1.648908  | -1.122715 |
| H | 0.620299  | -4.677744 | -3.901340 |
| H | 1.843694  | -3.411890 | -3.852449 |
| H | -0.940792 | -1.273254 | 4.664078  |
| H | 0.155321  | -2.263414 | 5.624914  |

## 29

Total SCF energy: -2008.66370290 a.u.  
Enthalpy at 298K: -2007.878008 a.u.  
Gibbs free energy at 298K: -2007.990266 a.u.  
Free energy in solution at 298K: -2007.975541 a.u.

## Cartesian coordinates

| ATOM | X         | Y         | Z         |
|------|-----------|-----------|-----------|
| C    | -6.090153 | -0.251948 | 0.871213  |
| C    | -4.787497 | -0.753222 | 0.939695  |
| C    | -4.103916 | -1.206028 | -0.202499 |
| C    | -4.793455 | -1.122580 | -1.427895 |
| C    | -6.096379 | -0.624072 | -1.512471 |
| C    | -6.750446 | -0.187043 | -0.358306 |
| B    | -2.599574 | -1.816626 | -0.096600 |
| O    | -1.962496 | -1.686627 | 1.203886  |
| O    | -1.690505 | -1.055518 | -1.083801 |
| O    | -2.543993 | -3.249412 | -0.507902 |
| H    | -2.195748 | -2.457308 | 1.740293  |
| H    | -3.287217 | -3.450171 | -1.094497 |
| H    | -2.007726 | -0.150111 | -1.184703 |
| H    | -4.275921 | -0.798000 | 1.898810  |
| H    | -4.299275 | -1.451636 | -2.342873 |
| H    | -6.600491 | -0.574171 | -2.475351 |
| H    | -7.764387 | 0.201561  | -0.416786 |
| H    | -6.592201 | 0.086980  | 1.775141  |
| C    | 2.101688  | -1.858495 | -0.884939 |
| C    | 3.029739  | -1.388579 | -1.827080 |
| C    | 2.507173  | -2.914075 | -0.047693 |
| C    | 4.319477  | -1.930965 | -1.916654 |
| H    | 2.757849  | -0.595126 | -2.519219 |
| C    | 3.794609  | -3.451984 | -0.124617 |
| H    | 1.805226  | -3.338895 | 0.666063  |
| C    | 4.710388  | -2.957839 | -1.058565 |
| H    | 5.015284  | -1.547379 | -2.660380 |
| H    | 4.080159  | -4.265867 | 0.538859  |
| H    | 5.711550  | -3.376958 | -1.121684 |
| Ni   | 0.269804  | -1.343320 | -0.848931 |
| H    | -1.105957 | -3.340597 | -1.190130 |
| H    | -0.157461 | -3.159283 | -2.459536 |
| O    | -0.142947 | -3.203025 | -1.489707 |
| P    | 0.766748  | 0.631896  | 0.140897  |
| C    | -0.839065 | 1.526685  | 0.625689  |
| C    | 1.855295  | 1.768520  | -0.887521 |
| C    | 1.682606  | 0.467720  | 1.779514  |
| C    | -1.498546 | 2.275495  | -0.557323 |
| C    | -0.795178 | 2.463135  | 1.855339  |
| H    | -1.481045 | 0.679123  | 0.896875  |
| C    | 1.399619  | 1.916995  | -2.357351 |



|   |           |           |           |
|---|-----------|-----------|-----------|
| C | 2.162485  | 3.153089  | -0.277439 |
| H | 2.796332  | 1.202034  | -0.914732 |
| C | 3.206356  | 0.233812  | 1.679553  |
| C | 1.021056  | -0.623947 | 2.651490  |
| H | 1.546822  | 1.434292  | 2.282271  |
| C | -2.917795 | 2.753480  | -0.203795 |
| H | -0.891484 | 3.152829  | -0.816351 |
| H | -1.523891 | 1.659665  | -1.466014 |
| C | -2.208030 | 2.965760  | 2.212008  |
| H | -0.387920 | 1.942006  | 2.726395  |
| H | -0.139380 | 3.323025  | 1.660139  |
| C | 2.472605  | 2.642970  | -3.187214 |
| H | 1.182615  | 0.933405  | -2.790230 |
| H | 0.468143  | 2.491823  | -2.409327 |
| C | 3.228435  | 3.890117  | -1.109622 |
| H | 1.246776  | 3.758415  | -0.250429 |
| H | 2.505127  | 3.058065  | 0.759306  |
| C | 3.836341  | 0.176645  | 3.083552  |
| H | 3.408832  | -0.702485 | 1.152162  |
| H | 3.686840  | 1.034211  | 1.105427  |
| C | 1.662253  | -0.688420 | 4.047231  |
| H | -0.059063 | -0.463401 | 2.733855  |
| H | 1.140613  | -1.590347 | 2.147694  |
| C | -2.895469 | 3.663231  | 1.031362  |
| H | -3.349972 | 3.283744  | -1.062038 |
| H | -3.561527 | 1.884924  | -0.011229 |
| H | -2.145426 | 3.642953  | 3.073683  |
| H | -2.817871 | 2.108122  | 2.528754  |
| C | 2.816518  | 4.013548  | -2.583972 |
| H | 3.380444  | 2.023182  | -3.228563 |
| H | 2.125538  | 2.758820  | -4.221872 |
| H | 4.178188  | 3.339427  | -1.042690 |
| H | 3.412270  | 4.883310  | -0.680328 |
| C | 3.180587  | -0.898241 | 3.961876  |
| H | 4.913548  | -0.011299 | 2.990276  |
| H | 3.731260  | 1.157751  | 3.571709  |
| H | 1.196057  | -1.494114 | 4.628636  |
| H | 1.454545  | 0.246888  | 4.589367  |
| H | -2.354848 | 4.591112  | 0.790487  |
| H | -3.916039 | 3.957266  | 1.306090  |
| H | 3.616155  | 4.493997  | -3.161655 |
| H | 1.937870  | 4.671452  | -2.659827 |
| H | 3.385568  | -1.888919 | 3.531142  |
| H | 3.625088  | -0.892600 | 4.965443  |

### TS30

|                                  |                     |
|----------------------------------|---------------------|
| Total SCF energy:                | -1771.23474880 a.u. |
| Enthalpy at 298K:                | -1770.525172 a.u.   |
| Gibbs free energy at 298K:       | -1770.630553 a.u.   |
| Free energy in solution at 298K: | -1770.624593 a.u.   |

Imaginary frequency:

-227.7525 cm<sup>-1</sup>

Cartesian coordinates

| ATOM | X         | Y         | Z         |
|------|-----------|-----------|-----------|
| Ni   | 1.019937  | -0.245649 | -0.294801 |
| P    | -1.139553 | -0.152411 | -0.101314 |
| O    | 2.955840  | -0.302109 | -0.518703 |
| O    | 3.243628  | -1.149348 | 1.591116  |
| C    | 2.400289  | 1.151567  | -0.210549 |
| C    | 2.592891  | 1.747020  | 1.058661  |
| C    | 2.651251  | 3.137942  | 1.146274  |
| C    | 2.573475  | 3.947057  | 0.007455  |
| C    | 2.451870  | 3.341769  | -1.251255 |
| C    | 2.399234  | 1.957667  | -1.376044 |
| C    | 3.663032  | -0.978011 | 0.457508  |
| C    | -1.869433 | 1.533887  | -0.539073 |
| C    | -1.784362 | -0.508322 | 1.647094  |
| C    | -2.041005 | -1.355445 | -1.241231 |
| C    | -3.405803 | 1.664447  | -0.514346 |
| C    | -1.223108 | 2.658937  | 0.298136  |
| C    | -0.772375 | -1.351658 | 2.456516  |
| C    | -3.199930 | -1.113122 | 1.773459  |
| C    | -1.866272 | -0.960127 | -2.723945 |
| C    | -1.525312 | -2.795205 | -1.021541 |
| C    | -3.854503 | 3.049261  | -1.016021 |
| C    | -1.674195 | 4.045879  | -0.191127 |
| C    | -1.195612 | -1.473885 | 3.929627  |
| C    | -3.624174 | -1.230386 | 3.249482  |
| C    | -2.542426 | -1.967912 | -3.670230 |
| C    | -2.210655 | -3.801803 | -1.960427 |
| C    | -3.203886 | 4.179815  | -0.205644 |
| C    | -2.613941 | -2.046039 | 4.069091  |
| C    | -2.044889 | -3.400129 | -3.432264 |
| H    | 2.659073  | 1.125022  | 1.941992  |
| H    | 2.410141  | 3.955839  | -2.148162 |
| H    | 2.329111  | 1.485176  | -2.350780 |
| H    | 2.625854  | 5.028184  | 0.095086  |
| H    | 2.759055  | 3.594619  | 2.127731  |
| H    | -1.533118 | 1.681824  | -1.575828 |
| H    | -1.809372 | 0.490035  | 2.109711  |
| H    | -3.113260 | -1.329216 | -1.000937 |
| H    | -3.877638 | 0.880852  | -1.119696 |
| H    | -3.767091 | 1.529484  | 0.514337  |
| H    | -0.132752 | 2.583435  | 0.256857  |
| H    | -1.510278 | 2.545289  | 1.354105  |
| H    | -0.701118 | -2.357622 | 2.018409  |
| H    | 0.229949  | -0.916467 | 2.378539  |
| H    | -3.936806 | -0.515492 | 1.226490  |
| H    | -3.213842 | -2.114723 | 1.323074  |
| H    | -2.276036 | 0.039316  | -2.910700 |
| H    | -0.791142 | -0.906159 | -2.949517 |
| H    | -0.439963 | -2.808012 | -1.198894 |

|   |           |           |           |
|---|-----------|-----------|-----------|
| H | -1.669809 | -3.104853 | 0.019729  |
| H | -3.578708 | 3.154993  | -2.075737 |
| H | -4.948803 | 3.125440  | -0.969384 |
| H | -1.228224 | 4.823225  | 0.442128  |
| H | -1.283300 | 4.210329  | -1.205972 |
| H | -1.158512 | -0.479079 | 4.398759  |
| H | -0.475686 | -2.100275 | 4.471587  |
| H | -3.710575 | -0.221389 | 3.679738  |
| H | -4.622662 | -1.682728 | 3.312916  |
| H | -3.631317 | -1.932846 | -3.515970 |
| H | -2.366317 | -1.669850 | -4.712009 |
| H | -3.282222 | -3.857690 | -1.716519 |
| H | -1.799652 | -4.805225 | -1.789344 |
| H | -3.499307 | 5.156375  | -0.610629 |
| H | -3.580009 | 4.143453  | 0.827858  |
| H | -2.620224 | -3.087895 | 3.715255  |
| H | -2.914879 | -2.073144 | 5.124386  |
| H | -0.981462 | -3.464709 | -3.706416 |
| H | -2.579828 | -4.102799 | -4.084078 |
| N | 4.865112  | -1.426832 | -0.007007 |
| C | 5.359312  | -1.224110 | -1.360654 |
| H | 4.708711  | -0.537565 | -1.896346 |
| H | 6.373487  | -0.806228 | -1.325525 |
| H | 5.401184  | -2.178523 | -1.904506 |
| C | 5.683542  | -2.261443 | 0.859554  |
| H | 6.680591  | -1.818808 | 0.980084  |
| H | 5.201092  | -2.338462 | 1.832508  |
| H | 5.801109  | -3.265214 | 0.428495  |

### TS31

|                                  |                           |
|----------------------------------|---------------------------|
| Total SCF energy:                | -1771.24090475 a.u.       |
| Enthalpy at 298K:                | -1770.530749 a.u.         |
| Gibbs free energy at 298K:       | -1770.635113 a.u.         |
| Free energy in solution at 298K: | -1770.630157 a.u.         |
| Imaginary frequency:             | -58.5416 cm <sup>-1</sup> |

### Cartesian coordinates

| ATOM | X         | Y         | Z         |
|------|-----------|-----------|-----------|
| C    | -2.292708 | -1.462048 | 0.742870  |
| Ni   | -0.919673 | -0.344190 | -0.541511 |
| O    | -2.809494 | -0.900396 | -0.519585 |
| C    | -3.839949 | 0.043942  | -0.470077 |
| C    | -3.781378 | 1.107715  | -1.370512 |
| C    | -4.932202 | -0.122106 | 0.381841  |
| C    | -4.836975 | 2.019265  | -1.419642 |
| H    | -2.916113 | 1.204252  | -2.019374 |
| C    | -5.975383 | 0.802922  | 0.327178  |
| H    | -4.955150 | -0.946708 | 1.084333  |
| C    | -5.935706 | 1.872563  | -0.570368 |
| H    | -4.795159 | 2.846505  | -2.123030 |

|   |           |           |           |
|---|-----------|-----------|-----------|
| H | -6.825381 | 0.682490  | 0.993381  |
| H | -6.753819 | 2.586301  | -0.606144 |
| O | -2.427230 | -0.875868 | 1.809162  |
| N | -2.127786 | -2.832864 | 0.606138  |
| C | -1.898782 | -3.468488 | -0.684265 |
| C | -1.541159 | -3.513365 | 1.752129  |
| H | -2.508874 | -2.991532 | -1.449612 |
| H | -0.842886 | -3.415899 | -0.990279 |
| H | -2.189051 | -4.521913 | -0.605301 |
| H | -0.439635 | -3.503742 | 1.717338  |
| H | -1.870170 | -3.019260 | 2.665702  |
| H | -1.877261 | -4.555696 | 1.758108  |
| P | 1.122305  | 0.160133  | -0.210896 |
| C | 1.803996  | -0.584581 | 1.393380  |
| C | 1.369815  | 2.036505  | -0.208793 |
| C | 2.354956  | -0.430179 | -1.517971 |
| C | 1.054041  | -0.063132 | 2.639116  |
| C | 3.329189  | -0.564946 | 1.633872  |
| H | 1.511980  | -1.639636 | 1.275536  |
| C | 0.247010  | 2.773449  | 0.555737  |
| C | 2.750531  | 2.592711  | 0.192838  |
| H | 1.217795  | 2.276717  | -1.272224 |
| C | 2.024227  | 0.148241  | -2.911464 |
| C | 2.371239  | -1.973517 | -1.585261 |
| H | 3.360017  | -0.083811 | -1.235114 |
| C | 1.428544  | -0.874482 | 3.891248  |
| H | 1.318721  | 0.989674  | 2.810819  |
| H | -0.028398 | -0.102037 | 2.475973  |
| C | 3.697618  | -1.385065 | 2.884585  |
| H | 3.870948  | -0.962390 | 0.768162  |
| H | 3.675801  | 0.466066  | 1.773207  |
| C | 0.323926  | 4.291996  | 0.324634  |
| H | -0.729467 | 2.386331  | 0.241344  |
| H | 0.328107  | 2.568277  | 1.630805  |
| C | 2.826515  | 4.111820  | -0.047832 |
| H | 2.926948  | 2.398063  | 1.258971  |
| H | 3.553727  | 2.087501  | -0.357656 |
| C | 2.981095  | -0.376447 | -3.996203 |
| H | 0.990000  | -0.123116 | -3.169329 |
| H | 2.066031  | 1.243564  | -2.896607 |
| C | 3.328281  | -2.498779 | -2.668692 |
| H | 2.649734  | -2.402522 | -0.615588 |
| H | 1.349711  | -2.320734 | -1.798405 |
| C | 2.945518  | -0.891749 | 4.128962  |
| H | 0.908994  | -0.464421 | 4.766703  |
| H | 1.067073  | -1.906721 | 3.771155  |
| H | 4.782158  | -1.341631 | 3.050205  |
| H | 3.451380  | -2.442793 | 2.706761  |
| C | 1.704841  | 4.855886  | 0.692030  |
| H | 0.116041  | 4.506698  | -0.734611 |
| H | -0.459908 | 4.796180  | 0.904283  |
| H | 2.745919  | 4.310722  | -1.126936 |

|   |          |           |           |
|---|----------|-----------|-----------|
| H | 3.808082 | 4.490275  | 0.266497  |
| C | 2.999368 | -1.910050 | -4.046607 |
| H | 2.692412 | 0.034834  | -4.972202 |
| H | 3.997743 | -0.008670 | -3.791220 |
| H | 3.284274 | -3.595316 | -2.700332 |
| H | 4.362175 | -2.236128 | -2.398436 |
| H | 3.284600 | 0.126040  | 4.374119  |
| H | 3.191229 | -1.519162 | 4.995584  |
| H | 1.751102 | 5.930062  | 0.471014  |
| H | 1.859702 | 4.752951  | 1.776526  |
| H | 2.012355 | -2.273277 | -4.369351 |
| H | 3.722248 | -2.259390 | -4.795022 |

### TS32

|                                  |                            |
|----------------------------------|----------------------------|
| Total SCF energy:                | -2206.44676048 a.u.        |
| Enthalpy at 298K:                | -2205.735507 a.u.          |
| Gibbs free energy at 298K:       | -2205.841991 a.u.          |
| Free energy in solution at 298K: | -2205.831473 a.u.          |
| Imaginary frequency:             | -293.1055 cm <sup>-1</sup> |

### Cartesian coordinates

| ATOM | X         | Y         | Z         |
|------|-----------|-----------|-----------|
| C    | 2.265011  | 1.184035  | -0.030910 |
| C    | 2.526332  | 2.890644  | 1.657593  |
| H    | 2.605006  | 3.168048  | 2.706085  |
| C    | 2.472238  | 3.504878  | -0.678151 |
| C    | 2.363270  | 2.165908  | -1.041635 |
| H    | 2.515580  | 4.262446  | -1.457334 |
| C    | 2.546581  | 3.881306  | 0.669918  |
| H    | 2.645272  | 4.927544  | 0.943059  |
| H    | 2.333598  | 1.866531  | -2.084163 |
| C    | 2.418000  | 1.540346  | 1.326998  |
| H    | 2.422271  | 0.776415  | 2.096014  |
| Ni   | 0.846488  | -0.181300 | -0.309409 |
| O    | 2.753343  | -0.253531 | -0.544279 |
| S    | 3.795233  | -1.203943 | 0.347734  |
| O    | 5.054897  | -0.483756 | 0.442662  |
| O    | 3.098624  | -1.679063 | 1.538488  |
| N    | 3.999612  | -2.493615 | -0.689041 |
| C    | 4.720131  | -2.203955 | -1.934988 |
| H    | 5.091056  | -3.153154 | -2.333327 |
| H    | 4.072910  | -1.726513 | -2.684345 |
| H    | 5.570316  | -1.556800 | -1.719453 |
| C    | 2.856996  | -3.402883 | -0.831757 |
| H    | 3.232191  | -4.342220 | -1.249701 |
| H    | 2.425970  | -3.599904 | 0.149483  |
| H    | 2.082844  | -2.993571 | -1.497094 |
| P    | -1.303536 | 0.039789  | -0.084678 |
| C    | -1.859712 | -0.269203 | 1.693308  |
| C    | -2.259106 | -1.081813 | -1.278291 |

|   |           |           |           |
|---|-----------|-----------|-----------|
| C | -1.982103 | 1.755664  | -0.476597 |
| C | -1.152861 | -1.486320 | 2.332323  |
| C | -3.374280 | -0.308501 | 1.977567  |
| H | -1.452338 | 0.616780  | 2.203021  |
| C | -2.005254 | -2.577972 | -0.996261 |
| C | -3.765945 | -0.824429 | -1.496852 |
| H | -1.752159 | -0.854942 | -2.228655 |
| C | -1.624453 | 2.149042  | -1.927492 |
| C | -1.463844 | 2.825046  | 0.510443  |
| H | -3.077464 | 1.715421  | -0.388351 |
| C | -1.436172 | -1.557707 | 3.842921  |
| H | -1.502503 | -2.413362 | 1.858833  |
| H | -0.073047 | -1.428517 | 2.150468  |
| C | -3.651164 | -0.373005 | 3.490839  |
| H | -3.877424 | 0.564085  | 1.542761  |
| H | -3.813026 | -1.195989 | 1.502424  |
| C | -2.552632 | -3.461588 | -2.129715 |
| H | -0.931214 | -2.756361 | -0.858740 |
| H | -2.496750 | -2.863625 | -0.056254 |
| C | -4.312759 | -1.708319 | -2.633884 |
| H | -4.323017 | -1.040443 | -0.577290 |
| H | -3.952770 | 0.228314  | -1.736202 |
| C | -2.131800 | 3.556694  | -2.284806 |
| H | -0.532071 | 2.116089  | -2.038271 |
| H | -2.034840 | 1.421737  | -2.638741 |
| C | -1.972991 | 4.230801  | 0.145223  |
| H | -1.778413 | 2.588331  | 1.533501  |
| H | -0.366665 | 2.822653  | 0.507941  |
| C | -2.942645 | -1.569781 | 4.142344  |
| H | -0.955104 | -2.447509 | 4.268501  |
| H | -0.975544 | -0.688789 | 4.335901  |
| H | -4.733073 | -0.425224 | 3.669481  |
| H | -3.300903 | 0.557746  | 3.961057  |
| C | -4.045125 | -3.198675 | -2.378331 |
| H | -1.987715 | -3.256257 | -3.051190 |
| H | -2.386639 | -4.519950 | -1.890279 |
| H | -3.835775 | -1.411861 | -3.579935 |
| H | -5.388654 | -1.529420 | -2.757867 |
| C | -1.611699 | 4.609412  | -1.296838 |
| H | -1.827607 | 3.807935  | -3.309250 |
| H | -3.232296 | 3.561333  | -2.275987 |
| H | -1.556514 | 4.963177  | 0.848409  |
| H | -3.066258 | 4.266028  | 0.267080  |
| H | -3.381732 | -2.502036 | 3.756194  |
| H | -3.116158 | -1.569697 | 5.226029  |
| H | -4.402909 | -3.799653 | -3.224075 |
| H | -4.620554 | -3.523908 | -1.498689 |
| H | -0.518399 | 4.680909  | -1.385734 |
| H | -2.016115 | 5.599203  | -1.544949 |

**TS33**

Total SCF energy: -2206.45276698 a.u.  
Enthalpy at 298K: -2205.741732 a.u.  
Gibbs free energy at 298K: -2205.852213 a.u.  
Free energy in solution at 298K: -2205.843384 a.u.  
Imaginary frequency: -170.5468 cm<sup>-1</sup>

## Cartesian coordinates

| ATOM | X         | Y         | Z         |
|------|-----------|-----------|-----------|
| Ni   | -0.429972 | -1.141335 | 0.356184  |
| O    | -2.530205 | 0.045617  | -0.843842 |
| C    | -3.394425 | 0.952612  | -0.415278 |
| C    | -2.975033 | 2.071264  | 0.347452  |
| C    | -4.769591 | 0.852425  | -0.746449 |
| C    | -3.879685 | 3.060826  | 0.719871  |
| H    | -1.928468 | 2.135469  | 0.633876  |
| C    | -5.664583 | 1.845884  | -0.368545 |
| H    | -5.094935 | -0.017385 | -1.309084 |
| C    | -5.228602 | 2.958091  | 0.362976  |
| H    | -3.536016 | 3.915391  | 1.298588  |
| H    | -6.713816 | 1.756099  | -0.640569 |
| H    | -5.933979 | 3.729459  | 0.659857  |
| O    | -1.268629 | -2.719663 | 0.958303  |
| S    | -2.453511 | -1.807208 | 0.422200  |
| O    | -3.503788 | -1.537868 | 1.415441  |
| N    | -3.172863 | -2.697476 | -0.851864 |
| C    | -2.328007 | -2.771598 | -2.046013 |
| C    | -3.671826 | -4.001378 | -0.389026 |
| H    | -2.027820 | -1.760060 | -2.323116 |
| H    | -1.441294 | -3.409448 | -1.904607 |
| H    | -2.936593 | -3.190965 | -2.854026 |
| H    | -2.864241 | -4.719913 | -0.186367 |
| H    | -4.266716 | -3.853861 | 0.514459  |
| H    | -4.321745 | -4.400700 | -1.174224 |
| P    | 1.502077  | 0.099691  | 0.137979  |
| C    | 1.210137  | 1.808186  | -0.594792 |
| C    | 2.809188  | -0.877436 | -0.805059 |
| C    | 2.280079  | 0.416406  | 1.821401  |
| C    | 0.403651  | 1.761973  | -1.912791 |
| C    | 2.425852  | 2.748770  | -0.722553 |
| H    | 0.535756  | 2.245082  | 0.157279  |
| C    | 2.343173  | -1.276955 | -2.221607 |
| C    | 4.245798  | -0.316535 | -0.842960 |
| H    | 2.836695  | -1.807710 | -0.216934 |
| C    | 2.615715  | -0.921196 | 2.520282  |
| C    | 1.343616  | 1.265132  | 2.711106  |
| H    | 3.215273  | 0.974954  | 1.672835  |
| C    | -0.030292 | 3.177559  | -2.332607 |
| H    | 1.020524  | 1.325691  | -2.709703 |
| H    | -0.479144 | 1.124059  | -1.792339 |
| C    | 1.976413  | 4.163642  | -1.130230 |
| H    | 2.992751  | 2.792832  | 0.215744  |

|   |           |           |           |
|---|-----------|-----------|-----------|
| H | 3.110991  | 2.362221  | -1.488091 |
| C | 3.310911  | -2.292970 | -2.851993 |
| H | 1.328963  | -1.692932 | -2.180908 |
| H | 2.294803  | -0.386364 | -2.861696 |
| C | 5.213411  | -1.334285 | -1.475498 |
| H | 4.266998  | 0.608436  | -1.432123 |
| H | 4.591674  | -0.055926 | 0.164280  |
| C | 3.188923  | -0.706703 | 3.931492  |
| H | 1.700015  | -1.526585 | 2.587533  |
| H | 3.331172  | -1.500145 | 1.924662  |
| C | 1.922688  | 1.470587  | 4.121577  |
| H | 1.157464  | 2.243178  | 2.252618  |
| H | 0.368831  | 0.761687  | 2.786582  |
| C | 1.161939  | 4.141335  | -2.431959 |
| H | -0.561151 | 3.128071  | -3.291421 |
| H | -0.754368 | 3.558825  | -1.598654 |
| H | 2.854303  | 4.813578  | -1.238240 |
| H | 1.365507  | 4.594713  | -0.323459 |
| C | 4.751832  | -1.761718 | -2.876479 |
| H | 3.276775  | -3.228390 | -2.274325 |
| H | 2.977975  | -2.540319 | -3.867882 |
| H | 5.278695  | -2.220481 | -0.826980 |
| H | 6.222741  | -0.905711 | -1.519850 |
| C | 2.248170  | 0.135165  | 4.802908  |
| H | 3.376858  | -1.681109 | 4.399560  |
| H | 4.164207  | -0.202894 | 3.855563  |
| H | 1.211541  | 2.047093  | 4.726194  |
| H | 2.838308  | 2.076782  | 4.052134  |
| H | 1.816145  | 3.825942  | -3.258812 |
| H | 0.814642  | 5.152657  | -2.678277 |
| H | 5.430507  | -2.521472 | -3.283906 |
| H | 4.807334  | -0.897245 | -3.554785 |
| H | 1.315616  | -0.421817 | 4.973760  |
| H | 2.695769  | 0.309710  | 5.789296  |

**Ni (PCy<sub>3</sub>)<sub>2</sub>**

|                                  |                     |
|----------------------------------|---------------------|
| Total SCF energy:                | -2263.65154064 a.u. |
| Enthalpy at 298K:                | -2262.633849 a.u.   |
| Gibbs free energy at 298K:       | -2262.757735 a.u.   |
| Free energy in solution at 298K: | -2262.742771 a.u.   |

Cartesian coordinates

| ATOM | X         | Y         | Z         |
|------|-----------|-----------|-----------|
| P    | 0.000000  | 5.341592  | -4.490750 |
| C    | -1.753386 | -2.456973 | -4.477159 |
| C    | -2.555467 | -0.723279 | -4.437513 |
| C    | -4.050171 | -2.180222 | -1.590145 |
| C    | -4.274309 | -2.591308 | -3.126233 |
| C    | -3.458759 | 4.705246  | 0.589300  |
| C    | -1.961799 | 4.385397  | 0.415664  |



|    |           |           |           |
|----|-----------|-----------|-----------|
| C  | 0.980203  | 2.945847  | -1.361898 |
| C  | 0.757654  | 2.188187  | -2.689928 |
| C  | 1.754488  | 2.647061  | -3.767522 |
| C  | 1.701263  | 4.167343  | -3.982143 |
| C  | 1.898836  | 4.926233  | -2.660863 |
| C  | 0.890326  | 4.467493  | -1.591178 |
| C  | 0.799687  | 2.949730  | 1.588782  |
| C  | 2.274662  | 2.512599  | 1.729515  |
| C  | 2.925449  | 3.069669  | 3.007268  |
| C  | 2.134267  | 2.681165  | 4.263435  |
| C  | 0.667249  | 3.113191  | 4.140346  |
| C  | 0.017759  | 2.556886  | 2.862149  |
| H  | -2.190622 | 2.319105  | 0.930165  |
| H  | -2.168656 | 3.037341  | -2.034029 |
| H  | -2.412956 | 1.423985  | -1.365294 |
| H  | -4.593958 | 2.555106  | -1.913467 |
| H  | -4.466231 | 2.185901  | -0.195564 |
| H  | -3.971578 | 4.917993  | -1.500582 |
| H  | -5.341592 | 4.490750  | -0.479783 |
| H  | -3.589862 | 5.776151  | 0.793524  |
| H  | -3.842161 | 4.170325  | 1.471124  |
| H  | -1.419996 | 4.673764  | 1.324061  |
| H  | -1.560848 | 5.003846  | -0.395939 |
| H  | 2.014940  | 2.724732  | -1.058196 |
| H  | 0.847839  | 1.109655  | -2.512366 |
| H  | -0.265643 | 2.361179  | -3.050992 |
| H  | 2.771903  | 2.360330  | -3.461414 |
| H  | 1.553888  | 2.122799  | -4.711165 |
| H  | 2.456973  | 4.477159  | -4.715621 |
| H  | 0.723279  | 4.437513  | -4.408142 |
| H  | 2.920906  | 4.754547  | -2.291529 |
| H  | 1.804086  | 6.007833  | -2.824961 |
| H  | -0.120697 | 4.727344  | -1.932104 |
| H  | 1.059437  | 5.017718  | -0.657191 |
| H  | 0.772967  | 4.044715  | 1.486945  |
| H  | 2.312483  | 1.413681  | 1.741725  |
| H  | 2.859494  | 2.834409  | 0.859849  |
| H  | 3.960619  | 2.711209  | 3.080999  |
| H  | 2.979435  | 4.166691  | 2.938416  |
| H  | 2.180222  | 1.590145  | 4.397076  |
| H  | 2.591308  | 3.126233  | 5.156843  |
| H  | 0.096152  | 2.784380  | 5.018584  |
| H  | 0.612915  | 4.212298  | 4.126822  |
| H  | -1.020411 | 2.903589  | 2.802354  |
| H  | -0.023564 | 1.459325  | 2.916420  |
| Ni | 0.000000  | 0.000000  | 0.036938  |
| P  | 0.000000  | -2.167724 | 0.061824  |
| C  | 1.753386  | -2.889863 | 0.096344  |
| C  | -0.980203 | -2.945847 | -1.361898 |
| C  | -0.799687 | -2.949730 | 1.588782  |
| C  | 2.555467  | -2.492518 | -1.161146 |
| C  | 1.961799  | -4.385397 | 0.415664  |

|   |           |           |           |
|---|-----------|-----------|-----------|
| H | 2.190622  | -2.319105 | 0.930165  |
| C | -0.757654 | -2.188187 | -2.689928 |
| C | -0.890326 | -4.467493 | -1.591178 |
| H | -2.014940 | -2.724732 | -1.058196 |
| C | -2.274662 | -2.512599 | 1.729515  |
| C | -0.017759 | -2.556886 | 2.862149  |
| H | -0.772967 | -4.044715 | 1.486945  |
| C | 4.050171  | -2.815838 | -0.995926 |
| H | 2.168656  | -3.037341 | -2.034029 |
| H | 2.412956  | -1.423985 | -1.365294 |
| C | 3.458759  | -4.705246 | 0.589300  |
| H | 1.419996  | -4.673764 | 1.324061  |
| H | 1.560848  | -5.003846 | -0.395939 |
| C | -1.754488 | -2.647061 | -3.767522 |
| H | -0.847839 | -1.109655 | -2.512366 |
| H | 0.265643  | -2.361179 | -3.050992 |
| C | -1.898836 | -4.926233 | -2.660863 |
| H | 0.120697  | -4.727344 | -1.932104 |
| H | -1.059437 | -5.017718 | -0.657191 |
| C | -2.925449 | -3.069669 | 3.007268  |
| H | -2.312483 | -1.413681 | 1.741725  |
| H | -2.859494 | -2.834409 | 0.859849  |
| C | -0.667249 | -3.113191 | 4.140346  |
| H | 1.020411  | -2.903589 | 2.802354  |
| H | 0.023564  | -1.459325 | 2.916420  |
| C | 4.274309  | -4.294676 | -0.645709 |
| H | 4.593958  | -2.555106 | -1.913467 |
| H | 4.466231  | -2.185901 | -0.195564 |
| H | 3.589862  | -5.776151 | 0.793524  |
| H | 3.842161  | -4.170325 | 1.471124  |
| C | -1.701263 | -4.167343 | -3.982143 |
| H | -2.771903 | -2.360330 | -3.461414 |
| H | -1.553888 | -2.122799 | -4.711165 |
| H | -2.920906 | -4.754547 | -2.291529 |
| H | -1.804086 | -6.007833 | -2.824961 |
| C | -2.134267 | -2.681165 | 4.263435  |
| H | -3.960619 | -2.711209 | 3.080999  |
| H | -2.979435 | -4.166691 | 2.938416  |
| H | -0.096152 | -2.784380 | 5.018584  |
| H | -0.612915 | -4.212298 | 4.126822  |
| H | 3.971578  | -4.917993 | -1.500582 |
| H | 5.341592  | -4.490750 | 6.685700  |
| H | -2.456973 | -4.477159 | 9.432000  |
| H | -0.723279 | -4.437513 | 18.867300 |
| H | -2.180222 | -1.590145 | 4.397076  |
| H | -2.591308 | -3.126233 | 5.156843  |

**PCy<sub>3</sub>**

|                   |                     |
|-------------------|---------------------|
| Total SCF energy: | -1047.15889434 a.u. |
| Enthalpy at 298K: | -1046.652794 a.u.   |

Gibbs free energy at 298K:

-1046.720986 a.u.

Cartesian coordinates

| ATOM | X         | Y         | Z         |
|------|-----------|-----------|-----------|
| P    | 0.023253  | -0.126660 | -1.044031 |
| C    | -0.201009 | 1.611219  | -0.291846 |
| C    | 0.289175  | 1.859620  | 1.150578  |
| C    | -0.030695 | 3.291463  | 1.619100  |
| C    | 0.552580  | 4.343638  | 0.665323  |
| C    | 0.080274  | 4.105762  | -0.776259 |
| C    | 0.388661  | 2.674979  | -1.247358 |
| C    | 1.425404  | -0.903615 | -0.035769 |
| C    | 1.465341  | -2.435913 | -0.225324 |
| C    | 2.661782  | -3.077065 | 0.499963  |
| C    | 3.994704  | -2.448458 | 0.072133  |
| C    | 3.968411  | -0.925363 | 0.259328  |
| C    | 2.775196  | -0.289847 | -0.474006 |
| C    | -1.512802 | -1.054008 | -0.433016 |
| C    | -2.754781 | -0.603509 | -1.234488 |
| C    | -3.985345 | -1.467842 | -0.908365 |
| C    | -4.281736 | -1.491647 | 0.598610  |
| C    | -3.048907 | -1.931169 | 1.401520  |
| C    | -1.823042 | -1.057604 | 1.076580  |
| H    | -1.293010 | 1.754282  | -0.295505 |
| H    | 1.376396  | 1.710240  | 1.202573  |
| H    | -0.156236 | 1.137619  | 1.843616  |
| H    | 0.352977  | 3.444287  | 2.636631  |
| H    | -1.122318 | 3.418375  | 1.675384  |
| H    | 1.651220  | 4.291878  | 0.699872  |
| H    | 0.277345  | 5.353327  | 0.996677  |
| H    | 0.544790  | 4.832710  | -1.455382 |
| H    | -1.005548 | 4.276048  | -0.832859 |
| H    | 0.002037  | 2.518534  | -2.261442 |
| H    | 1.478880  | 2.543639  | -1.313139 |
| H    | 1.283957  | -0.697825 | 1.034572  |
| H    | 1.525798  | -2.666600 | -1.299593 |
| H    | 0.539126  | -2.893697 | 0.140393  |
| H    | 2.671597  | -4.158825 | 0.312468  |
| H    | 2.534157  | -2.950186 | 1.585421  |
| H    | 4.180077  | -2.678878 | -0.987551 |
| H    | 4.824597  | -2.890381 | 0.638586  |
| H    | 4.905509  | -0.479972 | -0.099635 |
| H    | 3.902597  | -0.691678 | 1.332517  |
| H    | 2.776812  | 0.794290  | -0.308999 |
| H    | 2.896204  | -0.435909 | -1.557217 |
| H    | -1.310412 | -2.093111 | -0.734905 |
| H    | -2.540141 | -0.640917 | -2.309572 |
| H    | -2.986910 | 0.446015  | -0.999419 |
| H    | -3.804055 | -2.495168 | -1.257788 |
| H    | -4.858717 | -1.099902 | -1.462611 |
| H    | -5.130861 | -2.154559 | 0.809359  |
| H    | -4.583592 | -0.484588 | 0.923752  |

|   |           |           |          |
|---|-----------|-----------|----------|
| H | -2.817060 | -2.980529 | 1.165526 |
| H | -3.261288 | -1.893540 | 2.478167 |
| H | -2.025285 | -0.030085 | 1.409410 |
| H | -0.956711 | -1.408833 | 1.650922 |

**PhOCONMe<sub>2</sub>**

|                                  |                    |
|----------------------------------|--------------------|
| Total SCF energy:                | -554.78391262 a.u. |
| Enthalpy at 298K:                | -554.582605 a.u.   |
| Gibbs free energy at 298K:       | -554.634898 a.u.   |
| Free energy in solution at 298K: | -554.637193 a.u.   |

Cartesian coordinates

| ATOM | X         | Y         | Z         |
|------|-----------|-----------|-----------|
| C    | -1.784087 | 1.246185  | -0.418686 |
| C    | -3.164118 | 1.050747  | -0.482400 |
| C    | -0.971907 | 0.241588  | 0.106145  |
| C    | -3.725264 | -0.144564 | -0.028963 |
| C    | -2.897870 | -1.141158 | 0.493760  |
| C    | -1.516560 | -0.956553 | 0.570319  |
| H    | -4.799300 | -0.298800 | -0.081667 |
| H    | -3.327700 | -2.073875 | 0.848880  |
| H    | -0.871706 | -1.730171 | 0.966758  |
| O    | 0.381462  | 0.549993  | 0.218465  |
| C    | 1.333045  | -0.372246 | -0.161279 |
| O    | 1.074348  | -1.464880 | -0.629101 |
| H    | -1.326259 | 2.166928  | -0.766668 |
| H    | -3.797790 | 1.833940  | -0.889536 |
| N    | 2.590103  | 0.113225  | 0.064484  |
| C    | 3.728506  | -0.699848 | -0.333297 |
| H    | 4.291468  | -0.210710 | -1.140166 |
| H    | 4.404994  | -0.846976 | 0.518473  |
| H    | 3.366634  | -1.665938 | -0.681797 |
| C    | 2.890253  | 1.441890  | 0.575640  |
| H    | 3.588555  | 1.364517  | 1.418921  |
| H    | 3.361858  | 2.060681  | -0.201012 |
| H    | 1.980063  | 1.930667  | 0.914080  |

**PhOSO<sub>2</sub>NMe<sub>2</sub>**

|                                  |                    |
|----------------------------------|--------------------|
| Total SCF energy:                | -989.99311599 a.u. |
| Enthalpy at 298K:                | -989.790516 a.u.   |
| Gibbs free energy at 298K:       | -989.845611 a.u.   |
| Free energy in solution at 298K: | -989.848304 a.u.   |

Cartesian coordinates

| ATOM | X         | Y         | Z         |
|------|-----------|-----------|-----------|
| C    | -1.896937 | -1.191843 | -0.333541 |
| C    | -3.280200 | -1.193425 | -0.147545 |
| C    | -1.231503 | 0.030138  | -0.416515 |

|   |           |           |           |
|---|-----------|-----------|-----------|
| C | -3.979686 | 0.011834  | -0.047679 |
| C | -3.294391 | 1.226516  | -0.130063 |
| C | -1.910894 | 1.242359  | -0.312965 |
| H | -5.056543 | 0.004495  | 0.095361  |
| H | -3.835413 | 2.165157  | -0.049688 |
| H | -1.355544 | 2.172023  | -0.374652 |
| H | -1.332202 | -2.114446 | -0.410275 |
| H | -3.810541 | -2.139216 | -0.080910 |
| O | 0.148631  | 0.047439  | -0.674819 |
| S | 1.175284  | -0.072937 | 0.646404  |
| O | 0.990617  | 1.115368  | 1.465502  |
| O | 1.034014  | -1.410320 | 1.202919  |
| N | 2.630226  | 0.031446  | -0.142424 |
| C | 3.002677  | -1.123400 | -0.969593 |
| H | 2.492326  | -1.115740 | -1.942675 |
| H | 4.084037  | -1.082170 | -1.130394 |
| H | 2.761629  | -2.042606 | -0.435962 |
| C | 2.965838  | 1.342384  | -0.712315 |
| H | 4.047372  | 1.366591  | -0.875406 |
| H | 2.452797  | 1.521243  | -1.667533 |
| H | 2.700448  | 2.124278  | -0.000890 |

**NMe<sub>2</sub>COO<sup>-</sup>**

|                            |                            |
|----------------------------|----------------------------|
| Total SCF energy:          | -323.16571772 a.u.         |
| Enthalpy at 298K:          | -323.065279 a.u.           |
| Gibbs free energy at 298K: | -323.101604 a.u.           |
| Imaginary frequency:       | -112.3402 cm <sup>-1</sup> |

Cartesian coordinates

| ATOM | X         | Y         | Z         |
|------|-----------|-----------|-----------|
| O    | 1.438517  | 1.139047  | 0.000045  |
| C    | 0.911499  | -0.000005 | -0.000105 |
| O    | 1.438754  | -1.138965 | 0.000048  |
| N    | -0.561953 | -0.000035 | -0.000135 |
| C    | -1.299193 | -1.224676 | 0.000031  |
| H    | -1.958425 | -1.331461 | 0.888306  |
| H    | -1.958700 | -1.331515 | -0.888029 |
| H    | -0.564691 | -2.033080 | -0.000055 |
| C    | -1.299148 | 1.224629  | 0.000032  |
| H    | -1.958366 | 1.331452  | 0.888311  |
| H    | -0.564605 | 2.033008  | -0.000058 |
| H    | -1.958654 | 1.331500  | -0.888022 |

**NMe<sub>2</sub>SO<sub>3</sub><sup>-</sup>**

|                                  |                    |
|----------------------------------|--------------------|
| Total SCF energy:                | -758.42206327 a.u. |
| Enthalpy at 298K:                | -758.317761 a.u.   |
| Gibbs free energy at 298K:       | -758.358095 a.u.   |
| Free energy in solution at 298K: | -758.408963 a.u.   |

Cartesian coordinates

| ATOM | X         | Y         | Z         |
|------|-----------|-----------|-----------|
| O    | 1.244809  | -1.253371 | -0.591691 |
| O    | 1.244634  | 1.254110  | -0.590451 |
| S    | 0.736841  | 0.000029  | 0.016377  |
| O    | 0.729299  | -0.000789 | 1.506072  |
| N    | -0.967624 | 0.000041  | -0.462848 |
| C    | -1.649065 | -1.205763 | -0.013579 |
| H    | -1.766596 | -1.253787 | 1.085191  |
| H    | -2.649356 | -1.248339 | -0.470562 |
| H    | -1.071994 | -2.073456 | -0.340185 |
| C    | -1.649194 | 1.205738  | -0.013533 |
| H    | -1.072326 | 2.073529  | -0.340203 |
| H    | -2.649561 | 1.248087  | -0.470376 |
| H    | -1.766641 | 1.253767  | 1.085259  |

**PhB(OH)<sub>3</sub><sup>-</sup>**

|                            |                    |
|----------------------------|--------------------|
| Total SCF energy:          | -484.10770360 a.u. |
| Enthalpy at 298K:          | -483.960566 a.u.   |
| Gibbs free energy at 298K: | -484.006920 a.u.   |

Cartesian coordinates

| ATOM | X         | Y         | Z         |
|------|-----------|-----------|-----------|
| O    | -2.073258 | -0.090709 | 1.406553  |
| B    | -1.586619 | -0.021694 | 0.009576  |
| O    | -2.037690 | 1.227586  | -0.668761 |
| H    | -2.983583 | 1.261507  | -0.456463 |
| O    | -2.127270 | -1.230381 | -0.648448 |
| H    | -2.007414 | -1.061096 | -1.593487 |
| H    | -1.634855 | 0.638490  | 1.867448  |
| C    | 0.070548  | 0.005144  | -0.035036 |
| C    | 0.814134  | -1.190608 | -0.003301 |
| C    | 0.821609  | 1.196014  | -0.052210 |
| C    | 2.211366  | -1.205993 | 0.022154  |
| H    | 0.260296  | -2.128196 | -0.012409 |
| C    | 2.220891  | 1.202255  | -0.027585 |
| H    | 0.281427  | 2.140435  | -0.101537 |
| C    | 2.926739  | -0.003509 | 0.012996  |
| H    | 2.749308  | -2.155069 | 0.046277  |
| H    | 2.765348  | 2.147857  | -0.045641 |
| H    | 4.016593  | -0.007236 | 0.031070  |

**B(OH)<sub>3</sub>**

|                                  |                    |
|----------------------------------|--------------------|
| Total SCF energy:                | -252.47085225 a.u. |
| Enthalpy at 298K:                | -252.416847 a.u.   |
| Gibbs free energy at 298K:       | -252.448568 a.u.   |
| Free energy in solution at 298K: | -252.450178 a.u.   |

Cartesian coordinates

| ATOM | X         | Y         | Z         |
|------|-----------|-----------|-----------|
| B    | -0.000149 | -0.000118 | 0.000267  |
| O    | -1.308782 | -0.412095 | -0.000129 |
| H    | -1.908661 | 0.347147  | -0.000152 |
| O    | 0.297516  | 1.339425  | 0.000149  |
| H    | 1.254986  | 1.478927  | -0.000905 |
| O    | 1.011309  | -0.927205 | -0.000198 |
| H    | 0.654077  | -1.826493 | 0.001147  |

**H<sub>2</sub>O**

|                                  |                   |
|----------------------------------|-------------------|
| Total SCF energy:                | -76.40702351 a.u. |
| Enthalpy at 298K:                | -76.382105 a.u.   |
| Gibbs free energy at 298K:       | -76.403550 a.u.   |
| Free energy in solution at 298K: | -76.406020 a.u.   |

Cartesian coordinates

| ATOM | X        | Y         | Z         |
|------|----------|-----------|-----------|
| O    | 0.000000 | 0.000000  | 0.119426  |
| H    | 0.000000 | 0.762617  | -0.477705 |
| H    | 0.000000 | -0.762617 | -0.477705 |

**Ph-Ph**

|                            |                    |
|----------------------------|--------------------|
| Total SCF energy:          | -463.29643148 a.u. |
| Enthalpy at 298K:          | -463.104558 a.u.   |
| Gibbs free energy at 298K: | -463.147605 a.u.   |

Cartesian coordinates

| ATOM | X         | Y         | Z         |
|------|-----------|-----------|-----------|
| C    | -0.397370 | 1.138624  | 2.860624  |
| C    | -0.397704 | 1.137978  | 1.466146  |
| C    | 0.000000  | 0.000000  | 0.743286  |
| C    | 0.397704  | -1.137978 | 1.466146  |
| C    | 0.397370  | -1.138624 | 2.860624  |
| C    | 0.000000  | 0.000000  | 3.564548  |
| H    | -0.716937 | 2.027787  | 3.398212  |
| H    | -0.734276 | 2.020311  | 0.928639  |
| H    | 0.734276  | -2.020311 | 0.928639  |
| H    | 0.716937  | -2.027787 | 3.398212  |
| H    | 0.000000  | 0.000000  | 4.651345  |
| C    | 0.000000  | 0.000000  | -0.743286 |
| C    | -0.397704 | -1.137978 | -1.466146 |
| C    | 0.397704  | 1.137978  | -1.466146 |
| C    | -0.397370 | -1.138624 | -2.860624 |
| H    | -0.734276 | -2.020311 | -0.928639 |
| C    | 0.397370  | 1.138624  | -2.860624 |
| H    | 0.734276  | 2.020311  | -0.928639 |

|   |           |           |           |
|---|-----------|-----------|-----------|
| C | 0.000000  | 0.000000  | -3.564548 |
| H | -0.716937 | -2.027787 | -3.398212 |
| H | 0.716937  | 2.027787  | -3.398212 |
| H | 0.000000  | 0.000000  | -4.651345 |
